# Supplementary material for: An LKB1–SIK Axis Suppresses Lung Tumor Growth and Controls Differentiation
Source: Oxford University Press journal article supplement (doi:10.1158/2159-8290.cd-18-1237), 2019-07-26
Supplement: 21598290cd181237-sup-210808_2_supp_5623929_pz1fjk.xlsx [file 21598290cd181237-sup-210808_2_supp_5623929_pz1fjk.xlsx]

## Sheet: sgRNA_Design_invitro.Efficiency
Supplementary Table S1. Summary of sgRNA characteristics and cloning strategies.
sgRNA	sgRNA Sequence (5' G appended for U6 expression where indicated)	Doench et al. 2016 Activity Score	Hsu et al. 2013 Off-target Score	Cutting Efficiency (%) (% indels/%YFP+ cells)
sgAmpk1	GCAAGGCTCCGAATCTTCTGC	0.6128	0.9237	0.27
sgAmpk2	GCCAATTGACAGGCCATAAAG	0.5465	0.8965	0.28
sgNuak1	GAAGTCAAGAGAGCCACCGAG	0.7262	0.8736	0.41
sgNuak2	GGATCTGCTGCACATACGGA	0.7023	0.9451	0.33
sgSik11st	GATCATGTCGGAGTTCAGTG	0.744	0.9279	0.49
sgSik12nd	GTCTGGAGAAGATCTACCGGG	0.7899	0.9182	0.38
sgSik2	GTGATACAGTTTAATGATGTG	0.6904	0.8519	0.18
sgSik31st	GTGGCAGAGAAGGAAGCTCGA	0.6661	0.5522	0.4
sgSik32nd	GTTCAAACAGATCGTCACAG	0.8013	0.9118	0.35
sgMark2	GAGTAAGTCCAACATGCTGCG	0.7295	0.9243	0.43
sgMark3	GACACATCCTCACAGGCCGAG	0.7045	0.9227	0.49
sgMark4	GGACTCAACCACCCCAACAT	0.7205	0.9591	0.17
sgSnrk	GAGCATGGCAGGGTTCAAGCG	0.7205	0.9591	Not Tested
sgLkb11st	GTGGTGGGCCGCAGTCACAA	0.651	0.8361	Ref. 67
sgLkb12nd	GAAGCTGCGCAGGATCCCCAA	0.6281	0.9525	Not Tested

## Sheet: Indel_Analysis_Primers
Primer sequences for amplifying/sequencing of CRISPR/Cas9- targeted loci
Target Locus	Forward Primer	Reverse Primer
Ampk1	CGTTGACAGTCCACAGGCT	AGAGTGGGGTTCTAGTGCAC
Ampk2	TGACATCCTGTGGTGCTGAA	CACTCACCACCTGCCTAGTG
Nuak1	GACCTGCCCTCTCCAACTC	TGAAGGTGTGTCTTTGGGGA
Nuak2	GCTTTGACTGCACTGGACTC	CAGGCATCACTATTGGGCAC
Sik1	GGGTTCGGGATAGAGGAGTG	TCTCTCTCTCTCGGAAGGGG
Sik2	CCTACAGGTGCCATCTCAGA	TCAAGTAGCTTCCCAGTTTCAT
Sik3	CAGCTCTGTTCAGGCTTTGT	GGGTGTAGCTCAGTGAGAAAAG
Mark2	CTAATCGTGGTTGGTGGTGC	CTCCTTTACATGCTTGGCCC
Mark3	TCAGCTCTTAGAACACCGGA	ACATGCAGTTCAAGACAGTTTT
Mark4	GGCTCACATGTTTCTCTCCAC	ACCCTTGACCTCACATCACA
Sik12nd	AGAAGTGAGCAGCTCCTTGT	AGAGCCCAGTGAAGGTCAAC
Sik32nd	CAGCTCTGTTCAGGCTTTGT	GGGTGTAGCTCAGTGAGAAAAG

## Sheet: Lenti-sgRNA.Cre_Cloning
Cloning strategies employed to assemble non-barcoded dual/triple Lenti-sgRNA/Cre vectors.
Multi-sgRNA Vector	5’ U6-sgRNA (Sbf1/PmeI)	Original (parental) U6 sg-RNA vector	3’ U6-sgRNA (Pac1/NotI)
sgAmpk1/2	sgAmpk1	sgAmpk2	--
sgNuak1/2	sgNuak1	sgNuak2	--
sgSik1/2	sgSik1	sgSik2	--
sgSik1/3, sgSik1/2/3	sgSik1	sgSik3	sgSik2 (triple guide only)
sgMark2/3, sgMark2/3/4	sgMark3	sgMark2	sgMark4 (triple guide only)
sgMark3/4	--	sgMark3	sgMark4
sgMark2/4	--	sgMark2	sgMark4
sgControl	sgNT1	sgNeo2	--
sgLkb1/Neo2	sgLkb1	sgNeo2	--
sgSik1/32nd	sgSik12nd	sgSik32nd	--

## Sheet: Tuba-seq_Cloning
Summary of oligo sequences employed for assembling arrays of u6-sgRNA cassettes within the Lenti-Cre backbone for Tuba-seq.
Oligo	Sequence
pMJ117 Site-Directed Mutagenesis Forward	sgRNA+GTTTCAGAGCTAAGCACAAGAGT
pMJ117 Site-Directed Mutagenesis Universal Reverse	CATGTTTCTGGCTTTCCACAAG
pMJ179 Site-Directed Mutagenesis Forward	sgRNA+GTTTGAGAGCTAAGCAGAAAGCT
pMJ179 Site-Directed Mutagenesis Universal Reverse	CAACAAGGTGGTTCTCCAAGG
pMJ114 Site-Directed Mutagenesis Forward	sgRNA+GTTTAAGAGCTAAGCTGGAAACAG
pMJ114 Site-Directed Mutagenesis Universal Reverse	CATAAACATGGCCTCTCAAGAACT
pLL3 Linearization Forward	GTTTGGCGCGCCTATGGCTTAA
pLL3 Linearization Reverse	ACAGTTTAAACAGTTCCTGCAGGGC
hU6-sgRNA Gibson Amplification Forward	ATAGGCGCGCCAAACAAAAAAAGCACCCGACTCGG
hU6-sgRNA Gibson Amplification Reverse	GCTCGAATCTACACTCAGCTATG
mU6-sgRNA Gibson Amplification Forward (Dual)	AACTGTTTAAACTGTGATCCGACGCGCCATCTCTA
mU6-sgRNA Gibson Amplification Forward (Triple)	CCAGTCTGACTATCACGATTGA
mU6-sgRNA Gibson Amplification Reverse	GCTGAGTGTAGATTCGAGCAAA
bU6-sgRNA Gibson Amplification Forward	AACTGTTTAAACTGTCGTGACCGAGCTTGTCTG
bU6-sgRNA Gibson Amplification Reverse	AATCGTGATAGTCAGACTGGAAAAA
* Emboldened sequences correspond to regions encoding homology regions used for Gibson assembly
