# Supplementary material for: An LKB1–SIK Axis Suppresses Lung Tumor Growth and Controls Differentiation
Source: Oxford University Press journal article supplement (doi:10.1158/2159-8290.cd-18-1237), 2019-07-26
Supplement: 21598290cd181237-sup-210808_2_supp_5623930_p11fjk.xlsx [file 21598290cd181237-sup-210808_2_supp_5623930_p11fjk.xlsx]

## Sheet: Boland et al. 2018
Supplementary Table S2. Summary of published human lung adenocarcinoma datasets for which genotype and histological subtype annotations are available.
Boland et al. 2018 Human Pathology
Mutated Genes	Number of IMA Cases	Number of Mixed IMA/NMA Cases
KRAS only	23	9
KRAS + LKB1	6	3
KRAS + GNAS	1	1
KRAS + TP53	0	2
KRAS + CDKN2A	0	2
KRAS + PIK3CA	1	0
KRAS + CDKN2A + PIK3CA	1	0
Other	10	8
Total	42	25
IMA : Invasive Mucinous Adenocarcinoma
NMA : Non-mucinous Adenocarcinoma
ICA : Invasive Colloid Adenocarcinoma

## Sheet: Hwang et al. 2016
Hwang et al. 2016 Journal of Thoracic Oncology
Genetic profiling of 21 IMA, Mixed IMA/NMA, and adenocarcinomas with mucinous features have LKB1 mutations
Mutated Genes	Number of Cases
KRAS Only	5
KRAS + NKX2-1	4
KRAS + LKB1	5
KRAS + TP53	2
KRAS + SETD2	2
LKB1 Only	1
Other	2
Total	21
IMA : Invasive Mucinous Adenocarcinoma
NMA : Non-mucinous Adenocarcinoma

## Sheet: Nakagomi et al. 2018
Nakagomi et al. 2018 Cancers (Basel)
Genetic profiling of 20 IMAs
Mutated Genes	Number of Cases
LKB1 Only	2
KRAS + LKB1	1
KRAS + CDKN2A	1
Other	17
Total	20
IMA : Invasive Mucinous Adenocarcinoma

## Sheet: Sonzogni et al. 2017
Sonzogni et al. 2017 The Journal of Pathology: Clinical Research
Genetic profiling of 15 ICAs and 12 IMAs
Mutated Genes	Number of IMA cases	Number of ICA cases
LKB1 Only	1	1
KRAS + LKB1	1	1
KRAS + CDKN2A	2	0
Other	8	13
Total	12	15
IMA : Invasive Mucinous Adenocarcinoma
ICA : Invasive Colloid Adenocarcinoma

## Sheet: Osoegawa et al. 2009
Osoegawa et al. 2011 Japanese Journal of Clinical Oncology
Analysis of 10 mucinous broncheoalveolar carcinomas derived from 2 Peutz-Jeghers (PJS) cases and 7 sporadic cases
Mutated Genes	PJS Tumors	Sporadic Tumors
KRAS Only	2	2
LKB1 Only	1	1
p53 Only	0	0
EGFR Only	0	0
KRAS + LKB1	0	0
EGFR + LKB1	0	2
LKB1 + p53	0	1
Other	0	1
Total	3	7

## Sheet: Imielinski et al. 2012
Imielinski et al. 2012 Cell	Analysis of 182 lung adenocarcinomas spanning multiple histological subtypes
	Mutated Genes
Histological Subtype	KRAS Only	LKB1 Only	KRAS + LKB1	Other	Total
Lung adenocarcinoma, acinar predominant	11	3	4	28	46
Lung adenocarcinoma, adenocarcinoma in situ	0	0	0	1	1
Lung adenocarcinoma, colloid adenocarcinoma	0	0	0	1	1
Lung adenocarcinoma, invasive mucinous	1	0	1	3	5
Lung adenocarcinoma, lepidic predominant	1	1	1	10	13
Lung adenocarcinoma, mucinous invasive adenocarcinoma	0	0	0	1	1
Lung adenocarcinoma, micropapillary predominant	5	1	1	10	17
Lung adenocarcinoma, mixed histology	1	0	0	0	1
Lung adenocarcinoma, not otherwise specified	7	1	0	9	17
Lung adenocarcinoma, papillary predominant	2	3	0	14	19
Lung adenocarcinoma, solid predominant	10	4	4	28	46
NSCLC, favor adenocarcinoma	0	0	1	0	1
NSCLC, not otherwise specific	2	1	1	9	13
NSCLC, not otherwise specified versus mixed adenocarcinoma/LCNEC	1	0	0	0	1
Total	41	14	13	114	182

## Sheet: TCGA LUAD Pan Cancer Atlas
TCGA LUAD Pan Cancer Atlas	Analysis of 507 lung adenocarcinomas spanning multiple histological subtypes
	Mutated Genes
Histological Subtype	KRAS Only	LKB1 Only	KRAS + LKB1	Other	Total
Lung Acinar Adenocarcinoma	3	1	3	11	18
Lung Adenocarcinoma, Not otherwise specified	78	20	21	196	315
Lung Adenocarcinoma, Mixed Subtype	27	13	6	61	107
Lung Bronchioloalveolar Carcinoma, Mucinous	1	0	0	4	5
Lung Bronchioloalveolar Carcinoma, Non-Mucinous	6	0	2	10	18
Lung Clear Cell Adenocarcinoma	1	0	0	1	2
Lung Micropapillary Adenocarcinoma	1	0	0	2	3
Lung Mucinous Adenocarcinoma	1	0	0	1	2
Lung Papillary Adenocarcinoma	8	1	3	10	22
Lung Signet Ring Adenocarcinoma	0	0	0	1	1
Lung Solid Pattern Predominant Adenocarcinoma	2	0	0	3	5
Mucinous (Colloid) Carcinoma	4	0	2	3	9
Total	132	35	37	303	507
