# Supplementary material for: An LKB1–SIK Axis Suppresses Lung Tumor Growth and Controls Differentiation
Source: Oxford University Press journal article supplement (doi:10.1158/2159-8290.cd-18-1237), 2019-07-26
Supplement: 21598290cd181237-sup-210808_2_supp_5623931_pj1fjk.xlsx [file 21598290cd181237-sup-210808_2_supp_5623931_pj1fjk.xlsx]

## Sheet: GSEA_Summary
Supplementary Table S3. Summaries of GSEA and ssGSEA analyses of human lung adenocarcinoma data sets using previously published signatures of mucinous adenocarcinoma.
Data Set	Genotype Comparison	Gene Set	Gene Set Size	NES	FDR	Core Enrichment Size	Core Enrichment
Wilkerson et al., 2012	KRAS Mutant; LKB1 Mutant/Wild-type	MAEDA_2012_MOUSE_HUMAN_IMA	12	-0.8584	0.7309	6	SPATS2, GOLM1, EHF, MAPK13, KRT18, GPRC5C
Wilkerson et al., 2012	KRAS Mutant; LKB1 Mutant/Wild-type	SNYDER_2013_MOUSE_HUMAN_IMA	106	-1.7663	0.0024	30	PLEKHA6, PLS1, ZDHHC13, GRTP1, CLCN2, GALE, TMEM117, FBLIM1, SORD, NQO1, DSP, KCNN4, CDC25A, EPS8, ARHGEF16, SLC39A4, IER3, SERINC2, TM4SF4, TMPRSS4, KRT8, FA2H, TMEM54, F2RL1, SLC2A1, GCNT3, GAL3ST1, RHBDL2, SPP1, B3GNT3
Wilkerson et al., 2012	KRAS Mutant; LKB1 Mutant/Wild-type	GUO_2017_MUCINOUS_LUNG_TUMOR_SIGNATURE	143	-2.0546	0	45	ST14, TNFRSF11B, KRT18, AGR2, GPRC5C, ADAM8, EGLN3, PLEKHA6, PLS1, ZDHHC13, GRTP1, CLCN2, GALE, TMEM117, FBLIM1, SORD, NQO1, DSP, KCNN4, CDC25A, EPS8, ARHGEF16, SLC39A4, IER3, SERINC2, TM4SF4, TMPRSS4, KRT8, TNS4, PLEK2, FA2H, TMEM54, BCAS1, F2RL1, SLC2A1, LAD1, GCNT3, GAL3ST1, CP, ELF3, RHBDL2, KRT19, VTCN1, SPP1, B3GNT3
Wilkerson et al., 2012	LKB1 Mutant/Wild-type	MAEDA_2012_MOUSE_HUMAN_IMA	12	-1.6387	0.0091	4	MAPK13, CREB3L1, EHF, LCN2
Wilkerson et al., 2012	LKB1 Mutant/Wild-type	SNYDER_2013_MOUSE_HUMAN_IMA	106	-1.1416	0.2127	18	F2RL1, GALE, GALNT7, TSPAN6, FAM83E, PAK1, FBLIM1, FUT8, IKBKE, SIDT1, SERINC2, RHBDL2, KCNN4, FHL2, B3GNT3, GCNT3, IER3, ANKRD22
Wilkerson et al., 2012	LKB1 Mutant/Wild-type	GUO_2017_MUCINOUS_LUNG_TUMOR_SIGNATURE	143	-1.5111	0.0246	29	SLC28A3, F2RL1, GALE, GALNT7, TSPAN6, FAM83E, PAK1, MAPK13, FBLIM1, CREB3L1, FUT8, ADAM8, EHF, CP, IKBKE, SIDT1, SERINC2, ELF3, RHBDL2, ADAM28, LCN2, AGR2, KCNN4, FHL2, B3GNT3, VTCN1, GCNT3, IER3, ANKRD22
Selamat et al., 2012	KRAS Mutant; LKB1 Mutant/Wild-type	MAEDA_2012_MOUSE_HUMAN_IMA	12	1.4286	0.024	5	GPRC5C, SPATS2, EPCAM, LRG1, LCN2
Selamat et al., 2012	KRAS Mutant; LKB1 Mutant/Wild-type	SNYDER_2013_MOUSE_HUMAN_IMA	106	-1.0987	0.3981	36	LYPD6, GLB1L2, PLS1, IKBKE, SLC39A11, FHL2, ACOT11, METTL7B, SIDT1, KRT8, TMEM30B, RHPN2, PFKP, F2RL1, CBLC, PAK1, TOX3, FA2H, FAM83E, ERN2, MMP12, CAPN5, TMEM54, GCNT3, LYPD6B, DNAJC22, TM4SF4, ST14, TMPRSS4, ANKRD22, CEACAM1, CANT1, KCNN4, PDZK1IP1, SPP1, MMP7
Selamat et al., 2012	KRAS Mutant; LKB1 Mutant/Wild-type	GUO_2017_MUCINOUS_LUNG_TUMOR_SIGNATURE	143	-1.079	0.3404	43	LYPD6, GLB1L2, PLS1, IKBKE, SLC39A11, FUT2, FHL2, VTCN1, ACOT11, METTL7B, SIDT1, KRT8, TMEM30B, RHPN2, PFKP, F2RL1, CBLC, PAK1, TOX3, FA2H, FAM83E, FERMT1, ERN2, MMP12, CAPN5, ADAMDEC1, TMEM54, GCNT3, LYPD6B, DNAJC22, TM4SF4, ST14, TMPRSS4, ANKRD22, CEACAM1, CANT1, KCNN4, KRT19, ADAM8, PDZK1IP1, ATP10B, SPP1, MMP7
Selamat et al., 2012	LKB1 Mutant/Wild-type	MAEDA_2012_MOUSE_HUMAN_IMA	12	0.8262	0.8495	4	GPRC5C, SPATS2, EPCAM, CREB3L1
Selamat et al., 2012	LKB1 Mutant/Wild-type	SNYDER_2013_MOUSE_HUMAN_IMA	106	-1.5725	0.0224	38	KRT8, FA2H, TOX3, TSPAN6, FAM83E, MMP12, PLEKHA6, SLC39A11, METTL7B, FOXA3, ERN2, ARHGEF16, IKBKE, TFF1, SIDT1, PAK1, LYPD6B, GLB1L2, TMEM30B, SLC2A1, RHPN2, CAPN5, TMEM54, SLC22A18, ST14, CANT1, DNAJC22, KCNN4, PDZK1IP1, F2RL1, CAPN8, SPP1, TMPRSS4, ANKRD22, GCNT3, CEACAM1, TM4SF4, MMP7
Selamat et al., 2012	LKB1 Mutant/Wild-type	GUO_2017_MUCINOUS_LUNG_TUMOR_SIGNATURE	143	-1.572	0.015	45	KRT8, FA2H, PLEK2, TOX3, TSPAN6, FAM83E, MMP12, PLEKHA6, SLC39A11, METTL7B, FOXA3, ERN2, LCN2, ARHGEF16, IKBKE, TFF1, SIDT1, PAK1, GOLM1, LYPD6B, GLB1L2, TMEM30B, SLC2A1, RHPN2, CAPN5, TMEM54, SLC22A18, ST14, CANT1, LRG1, DNAJC22, KRT19, ADAM8, KCNN4, PDZK1IP1, F2RL1, ATP10B, CAPN8, SPP1, TMPRSS4, ANKRD22, GCNT3, CEACAM1, TM4SF4, MMP7
Skoulidis et al., 2015	KRAS Mutant; LKB1 Mutant/Wild-type	MAEDA_2012_MOUSE_HUMAN_IMA	12	1.6927	0.0268	7	ESRP1, GPRC5C, EPCAM, SPATS2, CREB3L1, LRG1, KRT18
Skoulidis et al., 2015	KRAS Mutant; LKB1 Mutant/Wild-type	SNYDER_2013_MOUSE_HUMAN_IMA	106	1.2765	0.1373	30	TFF1, SLC7A11, TESC, BACE2, DSP, SORD, CREB3L4, TOX3, GMDS, GSTA1, SPDEF, GOLPH3L, NQO1, UAP1, PLEKHA6, PLS1, TNFRSF11B, GCNT3, ATP8B1, IRF6, TM4SF4, KRT8, LYPD6B, AACS, OCIAD2, DNAJC22, HN1, SMPDL3B, ERN2, PMM2
Skoulidis et al., 2015	KRAS Mutant; LKB1 Mutant/Wild-type	GUO_2017_MUCINOUS_LUNG_TUMOR_SIGNATURE	143	1.4699	0.0609	30	TFF1, SLC7A11, TESC, BACE2, AGR2, MUC5B, ESRP1, DSP, GPRC5C, SORD, CREB3L4, TOX3, GMDS, GSTA1, SPDEF, GOLPH3L, TNS4, EPCAM, NQO1, BCAS1, UAP1, FUT2, PLEKHA6, PLS1, TNFRSF11B, GCNT3, PAX9, ATP8B1, IRF6, SPATS2
Schabath et al., 2016	KRAS Mutant; LKB1 Mutant/Wild-type	MAEDA_2012_MOUSE_HUMAN_IMA	12	1.5245	0.0473	4	ABP1, GPRC5C, LCN2, SPATS2
Schabath et al., 2016	KRAS Mutant; LKB1 Mutant/Wild-type	SNYDER_2013_MOUSE_HUMAN_IMA	106	1.5769	0.0586	26	TFF1, TESC, GSTA1, SLC7A11, IYD, FOXA3, NQO1, SMPDL3B, CREB3L4, GCNT3, FOXA1, SPDEF, ATP8B1, FA2H, UGDH, BACE2, SORD, OVOL2, LYPD6B, TTC39A, GMDS, CAPN5, PLEKHA6, AACS, TOX3, TM4SF4
Schabath et al., 2016	KRAS Mutant; LKB1 Mutant/Wild-type	GUO_2017_MUCINOUS_LUNG_TUMOR_SIGNATURE	143	1.6508	0.0697	37	TFF1, TESC, GSTA1, SLC7A11, BCAS1, MUC5B, IYD, FOXA3, ABP1, NQO1, SMPDL3B, CREB3L4, GCNT3, AGR2, FOXA1, SPDEF, GPRC5C, ATP8B1, FA2H, CLDN2, UGDH, BACE2, SORD, OVOL2, LYPD6B, TTC39A, GMDS, MUC5AC, CAPN5, PLEKHA6, AACS, LCN2, TOX3, TM4SF4, CP, SPATS2, BDH1
Schabath et al., 2016	LKB1 Mutant/Wild-type	MAEDA_2012_MOUSE_HUMAN_IMA	12	1.7636	0.0063	8	ABP1, GPRC5C, LCN2, SPATS2, ESRP1, EPCAM, CREB3L1, GOLM1
Schabath et al., 2016	LKB1 Mutant/Wild-type	SNYDER_2013_MOUSE_HUMAN_IMA	106	1.9264	0	33	TFF1, TESC, SLC7A11, GSTA1, NQO1, IYD, FOXA3, SMPDL3B, ATP8B1, CREB3L4, UGDH, SORD, SPDEF, OVOL2, LYPD6B, BACE2, FA2H, FOXA1, SLC39A4, BDH1, IRF6, ERN2, CAPN5, GPR39, GMDS, GALNT7, TMED3, AACS, FAM83E, PLEKHA6, MFSD9, TM4SF4, GCNT3
Schabath et al., 2016	LKB1 Mutant/Wild-type	GUO_2017_MUCINOUS_LUNG_TUMOR_SIGNATURE	143	1.9901	0	45	TFF1, TESC, SLC7A11, BCAS1, GSTA1, ABP1, AGR2, NQO1, MUC5B, IYD, FOXA3, SMPDL3B, ATP8B1, CREB3L4, UGDH, SORD, SPDEF, OVOL2, GPRC5C, LYPD6B, BACE2, FA2H, LCN2, MUC5AC, FUT2, FOXA1, SLC39A4, SLC44A4, BDH1, IRF6, ERN2, CAPN5, GPR39, GMDS, GALNT7, TMED3, AACS, FAM83E, CP, PLEKHA6, MFSD9, SPATS2, TM4SF4, GCNT3, CLDN2
TCGA LUAD Provisional	KRAS Mutant; LKB1 Mutant/Wild-type	MAEDA_2012_MOUSE_HUMAN_IMA	12	1.7444	0.0091	6	ABP1, GPRC5C, CREB3L1, GOLM1, KRT18, LCN2
TCGA LUAD Provisional	KRAS Mutant; LKB1 Mutant/Wild-type	SNYDER_2013_MOUSE_HUMAN_IMA	106	1.8884	0	43	TFF1, TESC, TM4SF4, ERN2, SLC7A11, IYD, SPDEF, ENTPD8, FOXA3, GSTA1, BACE2, LYPD6B, SMPDL3B, FAM83E, NQO1, FA2H, CREB3L4, CBLC, GAL3ST1, GPR39, PLEKHA6, CAPN5, FOXA1, SLC39A4, ATP8B1, CAPN8, GALNT7, UGDH, LENG9, GCNT3, DSP, GMDS, MFSD9, TOX3, SORD, GRTP1, OVOL2, HSD17B7, TMEM117, SLC12A8, TMED3, PFKP, IER3
TCGA LUAD Provisional	KRAS Mutant; LKB1 Mutant/Wild-type	GUO_2017_MUCINOUS_LUNG_TUMOR_SIGNATURE	143	1.9719	0	59	TFF1, MUC5B, TESC, TM4SF4, ERN2, BCAS1, SLC7A11, IYD, ABP1, SPDEF, ENTPD8, FOXA3, GSTA1, AGR2, BACE2, LYPD6B, GPRC5C, SMPDL3B, FAM83E, NQO1, SLC44A4, HNF4A, FA2H, CREB3L4, CBLC, GAL3ST1, CREB3L1, GPR39, PLEKHA6, GOLM1, CAPN5, FOXA1, SLC39A4, ATP8B1, CAPN8, GALNT7, CLDN2, FUT2, UGDH, LENG9, GCNT3, DSP, EGLN3, PAX9, TNS4, GMDS, KRT18, MFSD9, TOX3, SORD, LCN2, GRTP1, OVOL2, HSD17B7, TMEM117, SLC12A8…
TCGA LUAD Provisional	LKB1 Mutant/Wild-type	MAEDA_2012_MOUSE_HUMAN_IMA	12	1.7661	0.01	9	ABP1, GPRC5C, CREB3L1, LCN2, GOLM1, KRT18, ESRP1, SPATS2, EPCAM
TCGA LUAD Provisional	LKB1 Mutant/Wild-type	SNYDER_2013_MOUSE_HUMAN_IMA	106	1.8045	0.0136	40	TFF1, TESC, ERN2, ENTPD8, IYD, SLC7A11, GSTA1, SPDEF, LYPD6B, FOXA3, SMPDL3B, NQO1, BACE2, FAM83E, GAL3ST1, CREB3L4, TM4SF4, GPR39, SLC39A4, OVOL2, UGDH, CAPN5, ATP8B1, CBLC, FA2H, DSP, TMED3, SORD, FOXA1, GMDS, PLEKHA6, GRTP1, SLC12A8, ARHGEF16, PPIF, PFKP, MFSD9, TTC39A, LENG9, BDH1
TCGA LUAD Provisional	LKB1 Mutant/Wild-type	GUO_2017_MUCINOUS_LUNG_TUMOR_SIGNATURE	143	1.852	0.0184	51	TFF1, TESC, MUC5B, ERN2, BCAS1, ABP1, ENTPD8, IYD, SLC7A11, GSTA1, AGR2, SPDEF, LYPD6B, FOXA3, SMPDL3B, NQO1, GPRC5C, BACE2, CLDN2, FAM83E, GAL3ST1, CREB3L4, TM4SF4, GPR39, CREB3L1, SLC39A4, HNF4A, OVOL2, UGDH, CAPN5, ATP8B1, LCN2, CBLC, GOLM1, SLC44A4, FA2H, DSP, TMED3, SORD, KRT18, FOXA1, GMDS, PLEKHA6, GRTP1, SLC12A8, ARHGEF16, PPIF, ESRP1, PFKP, MFSD9, TTC39A

## Sheet: TCGA_Provisional_ssGSEA_Summary
Data Set	Mucinous Signature	Patient Subset	ssGSEA Score Statistic	Value
TCGA LUAD Provisional	MAEDA_2012_MOUSE_HUMAN_IMA	LKB1Mutant	Mean	0.705875
TCGA LUAD Provisional	MAEDA_2012_MOUSE_HUMAN_IMA	LKB1 Wild-type	Mean	0.667373
TCGA LUAD Provisional	MAEDA_2012_MOUSE_HUMAN_IMA	LKB1Mutant	Median	0.717708
TCGA LUAD Provisional	MAEDA_2012_MOUSE_HUMAN_IMA	LKB1 Wild-type	Median	0.665681
TCGA LUAD Provisional	MAEDA_2012_MOUSE_HUMAN_IMA	LKB1Mutant	Standard Deviation	0.119859
TCGA LUAD Provisional	MAEDA_2012_MOUSE_HUMAN_IMA	LKB1 Wild-type	Standard Deviation	0.138571
TCGA LUAD Provisional	MAEDA_2012_MOUSE_HUMAN_IMA	LKB1Mutant	Minimum	0.376348
TCGA LUAD Provisional	MAEDA_2012_MOUSE_HUMAN_IMA	LKB1 Wild-type	Minimum	0.125586
TCGA LUAD Provisional	MAEDA_2012_MOUSE_HUMAN_IMA	LKB1Mutant	Maximum	0.96177
TCGA LUAD Provisional	MAEDA_2012_MOUSE_HUMAN_IMA	LKB1 Wild-type	Maximum	1.12559
TCGA LUAD Provisional	MAEDA_2012_MOUSE_HUMAN_IMA	Comparison	K-S P-Value	0.007962
TCGA LUAD Provisional	SNYDER_2013_MOUSE_HUMAN_IMA	LKB1Mutant	Mean	0.945585
TCGA LUAD Provisional	SNYDER_2013_MOUSE_HUMAN_IMA	LKB1 Wild-type	Mean	0.878053
TCGA LUAD Provisional	SNYDER_2013_MOUSE_HUMAN_IMA	LKB1Mutant	Median	0.97449
TCGA LUAD Provisional	SNYDER_2013_MOUSE_HUMAN_IMA	LKB1 Wild-type	Median	0.887436
TCGA LUAD Provisional	SNYDER_2013_MOUSE_HUMAN_IMA	LKB1Mutant	Standard Deviation	0.133151
TCGA LUAD Provisional	SNYDER_2013_MOUSE_HUMAN_IMA	LKB1 Wild-type	Standard Deviation	0.133269
TCGA LUAD Provisional	SNYDER_2013_MOUSE_HUMAN_IMA	LKB1Mutant	Minimum	0.457184
TCGA LUAD Provisional	SNYDER_2013_MOUSE_HUMAN_IMA	LKB1 Wild-type	Minimum	0.139111
TCGA LUAD Provisional	SNYDER_2013_MOUSE_HUMAN_IMA	LKB1Mutant	Maximum	1.13608
TCGA LUAD Provisional	SNYDER_2013_MOUSE_HUMAN_IMA	LKB1 Wild-type	Maximum	1.13911
TCGA LUAD Provisional	SNYDER_2013_MOUSE_HUMAN_IMA	Comparison	K-S P-Value	2.159e-05
TCGA LUAD Provisional	GUO_2017_MUCINOUS_LUNG_TUMOR_SIGNATURE	LKB1Mutant	Mean	0.658731
TCGA LUAD Provisional	GUO_2017_MUCINOUS_LUNG_TUMOR_SIGNATURE	LKB1 Wild-type	Mean	0.620603
TCGA LUAD Provisional	GUO_2017_MUCINOUS_LUNG_TUMOR_SIGNATURE	LKB1Mutant	Median	0.667251
TCGA LUAD Provisional	GUO_2017_MUCINOUS_LUNG_TUMOR_SIGNATURE	LKB1 Wild-type	Median	0.618455
TCGA LUAD Provisional	GUO_2017_MUCINOUS_LUNG_TUMOR_SIGNATURE	LKB1Mutant	Standard Deviation	0.116958
TCGA LUAD Provisional	GUO_2017_MUCINOUS_LUNG_TUMOR_SIGNATURE	LKB1 Wild-type	Standard Deviation	0.132495
TCGA LUAD Provisional	GUO_2017_MUCINOUS_LUNG_TUMOR_SIGNATURE	LKB1Mutant	Minimum	0.373821
TCGA LUAD Provisional	GUO_2017_MUCINOUS_LUNG_TUMOR_SIGNATURE	LKB1 Wild-type	Minimum	0.0839544
TCGA LUAD Provisional	GUO_2017_MUCINOUS_LUNG_TUMOR_SIGNATURE	LKB1Mutant	Maximum	0.918494
TCGA LUAD Provisional	GUO_2017_MUCINOUS_LUNG_TUMOR_SIGNATURE	LKB1 Wild-type	Maximum	1.08395
TCGA LUAD Provisional	GUO_2017_MUCINOUS_LUNG_TUMOR_SIGNATURE	Comparison	K-S P-Value	0.01335
