# Supplementary material for: An LKB1–SIK Axis Suppresses Lung Tumor Growth and Controls Differentiation
Source: Oxford University Press journal article supplement (doi:10.1158/2159-8290.cd-18-1237), 2019-07-26
Supplement: 21598290cd181237-sup-210808_2_supp_5623933_p61fjl.xlsx [file 21598290cd181237-sup-210808_2_supp_5623933_p61fjl.xlsx]

## Sheet: KTC_sgSik.KT
Supplementary Table S5. Summary of GSEA analysis on Sik-targeted tumors using gene sets from previous publications centered on transcriptional profiling of the Lkb1-deficient state.
Gene Set	Gene Set Size	NES	FDR	Core Enrichment Size	Core Enrichment
KAUFMAN_129DOWN	52	1.91	0.01	16	MUC5AC, MFGE8, PITPNC1, DUSP4, PCF11, PIR, GABARAPL1, PDE4D, NMB, G6PD, POLR3B, NOTCH2, AVPI1, ME1, FDX1, PADI2
KAUFMAN_200FOX/CREB	200	1.85	0.016	59	TFF1, MSLN, LPAR1, NR4A2, F3, NR4A1, PDE10A, MUC5B, MUC5AC, TOB1, RHOBTB2, CPE, SIK1, DUSP4, BCAS1, CRLF1, ZFP36, SMPDL3B, AQP3, FURIN, DUSP1, HYAL2, AHCYL2, KLF5, ATP2C2, FOS, ERN2, FBLN5, IRS2, ID1, CREB3L1, TNFRSF10B, GALNT4, FAT1, PDE8A, GALNT2, CD55, ETS2, PDE4D, IGF1R, SIK2, NAAA, FAM83E, AVPI1, PGC, BMP2, TNS1, RPL13A, SFTPB, CHMP1B, TSC22D1, PRKAB1, PER1, CHL1, MTUS1, KCNQ1, COL14A1, ALG9…
JI_METASTASIS_REPRESSED_BY_STK11	27	1.82	0.016	8	NPTX1, AREG, GDF15, TNS4, CD24, F2RL1, ITGB5, DUSP4
KAUFMAN_FOX/CREB	16	1.72	0.041	6	MUC5AC, SIK1, DUSP4, IRS2, PDE4D, AVPI1
KAUFMAN_200MITO	200	1.65	0.065	51	GLRX3, CPSF6, HCCS, MSH2, MRPS30, VPS26A, MRPL13, NUDT21, CCDC59, COX5A, DTYMK, MRPL15, NUP205, NDUFB8, SNRPA1, ATP5J2, LRRC42, DRAP1, FAM149B1, PHB, RSL24D1, MRPS17, NDUFS1, C12orf10, NDUFAB1, COPS3, PPP1CC, PSMD9, MTIF2, WDR12, NCAPG, MRPL12, ZWILCH, FASTKD2, SPC25, DBF4, MRPL22, MRPS12, GEMIN6, MRPS11, EXOSC4, MRPS33, TIMM17B, COX5B, MRPS34, MRPL46, COMMD4, FAM35A, NAE1, NUP37, BUB1
SKOULIDIS_CHAPERONE.ANTIOXIDANT	12	1.63	0.058	7	HSP90AA1, HSPA5, ATF4, PDIA3, PDIA4, PDIA5, HSP90B1
KITAJIMA_KL.KP_MERGED_UP	59	1.57	0.025	20	TFF1, CLU, KIF1A, NR4A2, GPX2, SIK1, ALDH3A1, GSR, UGDH, KRT83, OSGIN1, PDE4D, IER3IP1, PGD, CHMP1B, PTGR1, CXXC1, SLC7A11, ENO3, RFK
KITAJIMA_KL.KP_CCLE_UP	159	1.51	0.021	43	TFF1, DMBT1, CLU, KIF1A, NR4A2, RBM24, GPX2, NR4A1, GCNT3, MUC5AC, SIK1, ALDH3A1, PAQR5, AQP3, GSR, ID3, UGDH, SLC7A7, PMP22, KRT81, KRT83, OSGIN1, PDE4D, IER3IP1, ABHD4, KLF13, CTGF, TXNRD1, PGD, ASS1, CHMP1B, CEBPB, PTGR1, EDN1, SLC30A1, CXXC1, EID3, KIF21B, SLC7A11, ENO3, YRDC, RFK, BMP7
KOYAMA_IMMUNE_UP	8	1.48	0.084	4	IL33, CXCL5, PPBP, LGALS9
CHEN_LKB1SIG	122	1.41	0.209	24	NR4A2, NR4A3, NR4A1, TFF1, MUC5B, NQO1, PDE4B, SIK1, PTGES, CDKN1C, SLIT2, ZFP36L1, MFGE8, ADRB2, MAN1A1, EPHB2, MBOAT2, DUSP4, GLS, ZCCHC24, IGF2BP2, IFI44, CFI, PDE4D
KITAJIMA_KL.KP_CCLE_DOWN	168	1.4	0.032	32	FOSL1, SOX9, MBOAT2, CCDC85B, ALPP, CDH3, FBLN2, KCNN4, SLC17A9, QSOX1, FBP1, PPARG, SLC39A4, LYPD6B, LIMK1, CLDN6, SOD3, ITGA6, GALNT12, DUSP10, CLDN9, SDC4, PLAU, RALGPS2, ZFP36L1, ANO1, ALDH1A3, GCNT1, GNA12, PLEKHA7, SH3RF2, CXCL17, PTGR1, EDN1, SLC30A1, CXXC1, EID3, KIF21B, SLC7A11, ENO3, YRDC, RFK, BMP7
KITAJIMA_KL.KP_MERGED_DOWN	82	1.39	0.026	18	FOSL1, MBOAT2, CCDC85B, CDH3, KCNN4, PPARG, LIMK1, ITGA6, DUSP10, CLDN9, SDC4, PLAU, ZFP36L1, ANO1, ALDH1A3, GNA12, SH3RF2
REACTOME_UNFOLDED_PROTEIN_RESPONSE	80	1.27	0.387	15	ATF3, LMNA, HSPA5, CALR, DNAJB9, ATF4, SHC1, CCL2, HYOU1, PDIA5, DDIT3, TATDN2, HSP90B1, SYVN1, KHSRP
PID_HIF1A_PATHWAY	19	1.22	0.452	2	HSP90AA1, TP53
REACTOME_ACTIVATION_OF_CHAPERONE_GENES_BY_XBP1S	46	1.18	0.472	18	LMNA, DNAJB9, SHC1, HYOU1, PDIA5, TATDN2, SYVN1, PPP2R5B, XBP1, DNAJB11, CXXC1, EDEM1, WFS1, SEC31A, ZBTB17, GSK3A, ACADVL, CUL7
SINGH_NFE2L2_TARGETS	15	1.18	0.43	8	NQO1, GSR, GCLC, HMOX1, G6PD, TXNRD1, GSTM4, ME1
IGARASHI_ATF4_TARGETS_DN	90	1.16	0.427	18	KLF4, SGMS2, GPX2, ATF4, CCL2, G3BP1, LIPA, KCNS3, SEC24D, SLC3A2, LEPR, CDS1, GALNT4, FZD6, AKT3, PSAT1, CBX1, SLC22A18
SKOULIDIS_NEUROENDOCRINE	4	1.13	0.457	1	KIF1A
SKOULIDIS_DEVELOPMENT	6	1.1	0.474	1	THPO
KAUFMAN_MITO	24	1.04	0.553	7	COX5A, NDUFS1, NDUFAB1, NDUFV2, MRPS11, MRPS33, MRPL46
JI_CARCINOGENESIS_BY_KRAS_AND_STK11_UP	12	0.97	0.663	5	TP63, TIAM1, KRT6A, KRT5, ADAM8
SKOULIDIS_CAMP	4	0.96	0.651	2	PDE4D, ODC1
REACTOME_TCA_CYCLE_AND_RESPIRATORY_ELECTRON_TRANSPORT	141	0.9	0.719	49	SUCLA2, NDUFB10, UQCRH, UQCRHL, ATP5F1, DLAT, SLC16A3, NDUFB5, NDUFB4, ATP5H, NDUFB6, NDUFS4, NDUFB3, CYC1, ETFA, NDUFA5, L2HGDH, ATP5L, COX6B1, NDUFS6, NDUFS3, NDUFA2, IDH3A, D2HGDH, COX5A, COX6C, IDH1, NDUFB8, ATP5J2, COX4I1, PDHX, NDUFS1, IDH2, ATP5E, NDUFAB1, ETFB, NDUFA7, NDUFA6, NDUFB2, NDUFV2, NDUFA13, NDUFB7, COX5B, UQCR11, LDHB, NDUFS7, NDUFA11, NDUFA3, ADHFE1
KAUFMAN_NRF2	8	0.89	0.701	5	SLC7A11, PIR, CBR1, G6PD, ME1
REACTOME_FATTY_ACID_TRIACYLGLYCEROL_AND_KETONE_BODY_METABOLISM	168	0.82	0.793	36	NR1D1, AGT, PPARGC1A, ANGPTL4, PPARG, GPAM, RXRA, PRKAB2, NPAS2, ARNTL, GPD2, CREBBP, TNFRSF21, TBL1X, MED15, ACSL3, BDH1, MED13L, PRKAG2, APOA1, TXNRD1, TBL1XR1, CPT1A, SLC27A1, ACSL1, CD36, MED12, ME1, GPD1, TECR, AGPAT4, MED29, GLIPR1, ACSL5, MED1, ACLY
WONG_MITOCHONDRIA_GENE_MODULE	217	0.6	0.958	92	SEC61G, MRPL49, MRPL11, NDUFB5, NDUFB4, AK2, ATP6V1C1, ECHS1, SLC25A19, ATP5H, MRPL45, NDUFB6, TSFM, NDUFS4, MCAT, NDUFB3, CYC1, MTX2, ATP6V1D, TOMM7, PCCB, NDUFA5, WARS2, ATP5L, MRPL18, COX6B1, DIABLO, NDUFS6, NDUFS3, ALDH6A1, OXCT1, HCCS, NT5M, MRPS30, SLC25A32, MRPS36, MRPL13, GCAT, COX5A, COX6C, TRIM45, VDAC3, HMGCS2, COX7A2, NDUFB8, ATP5J2, SURF1, ATP8A1, COX4I1, PDHX, SCP2, MRPS17, ECI1, ID…
KEGG_OXIDATIVE_PHOSPHORYLATION	135	-0.6	0.971	49	NDUFB5, NDUFB4, ATP6V1C1, ATP5H, NDUFB6, NDUFS4, NDUFB3, CYC1, ATP6V1D, NDUFA5, ATP5L, COX6B1, NDUFS6, NDUFS3, NDUFA2, ATP6V1C2, COX5A, COX6C, COX7A2, NDUFB8, ATP5J2, COX4I1, NDUFS1, ATP6V1H, COX11, ATP6V1F, ATP5E, NDUFAB1, ATP6V0B, ATP6V0E2, UQCR10, NDUFA7, NDUFA6, NDUFB2, NDUFV2, ATP6V1B2, NDUFB7, ATP4A, COX5B, LHPP, UQCR11, NDUFS7, ATP6V1G2, ATP6V1G1, COX6B2, NDUFA11, NDUFA3, COX6A2, ATP6V0D2
SKOULIDIS_NRF2	8	-0.72	1	2	GPX2, G6PD
IGARASHI_ATF4_TARGETS_UP	6	-0.72	1	1	EGR1
KAUFMAN_129UP	77	-0.84	1	15	TFF1, SLC5A3, SIK1, RIPK4, PPARGC1A, IRS2, ZFP36L1, SLC7A11, RFK, GAS7, SALL2, TBL1X, BAHD1, ACSL3, CBR1
REACTOME_METABOLISM_OF_AMINO_ACIDS_AND_DERIVATIVES	200	-0.93	1	30	NQO1, AZIN1, SLC5A5, SMOX, CKB, OTC, GCLC, GLS, IYD, ETHE1, TPH2, ASS1, GATM, AANAT, PSMD3, CKMT1A, CKMT1B, AHCY, PSAT1, ODC1, PSMD2, PSMA4, DAO, PSMB5, SRM, PAOX, PSMC3, PSMD7, MAT2A, PSMD1
KITAJIMA_KL.KP_TCGA_UP	1618	-0.93	0.685	246	WDFY4, ITPR1, NRXN3, HTR2C, TTC8, CPS1, MDM4, RORC, FGG, CAMKK1, KLHL32, NHEJ1, RPH3AL, SLC26A9, KIAA0319, DUOXA1, MYOM1, AR, EXTL1, ZNF444, OAT, BACE2, WNT4, SETD4, MCTP2, ANKRD45, PAIP2B, TRIM71, ATP8A1, ADCK1, PCSK1, KLHL8, SLC16A12, RET, ALPL, ABLIM2, HEPACAM2, CPT1B, GRIPAP1, MTUS2, SLC46A3, GPRC5C, TBC1D19, ASXL3, MEGF9, PNPLA7, TSPYL2, ZC3H7A, DISC1, IGFBP5, KLK14, ANKRD16, PHPT1, PHKA1, H…
KAUFMAN_DOWN	26	-0.97	1	4	ZFP36L1, MFGE8, GAS7, PCF11
KAUFMAN_200NRF2	200	-0.99	1	31	MEGF9, CEACAM1, CEACAM6, PSG3, CD63, HEXB, PHKB, TKT, NUPR1, ADCY7, SLC38A6, DAPK2, ADH1C, BLVRB, CYP4F11, CYP4F2, ACE2, TMOD1, GULP1, SLC46A3, TBXAS1, CLDN8, SLC39A8, NEIL3, DNAI2, SYBU, SULT1A1, SULT1A2, SULT1A3, KYNU, SLC7A8
KOYAMA_IMMUNE_DOWN	2	-1.18	0.257	2	CCL5, CXCL12
KITAJIMA_KL.KP_TCGA_DOWN	1843	-1.44	0.024	426	DDX58, USP18, HSPB1, SLC26A10, KLHL7, TGM4, LPXN, CDH4, IFT57, RGL1, LOXL3, GNG11, GPC4, DOCK8, CD109, SLFN5, BAMBI, SLC31A2, PIK3CA, ZNF100, ZNF257, ZNF43, ZNF430, ZNF431, ZNF486, ZNF492, ZNF493, ZNF626, ZNF676, ZNF682, ZNF714, ZNF718, ZNF727, ZNF732, ZNF737, ZNF85, ZNF93, ZNF98, FBXO17, KIF7, MRC2, GPR68, PEX5L, ABHD5, PTPN5, TGFB2, IL12RB1, CD101, MED12L, PON1, GAS1, TNIK, ASTN1, FSTL1, STARD3…
KAUFMAN_200DOWN	200	-1.77	0.002	39	PDLIM2, NEK1, VGLL3, CTGF, DAB2, IGFBP4, FBLN1, LYST, MYO1B, TACC1, ELN, PLSCR4, MYH11, AEBP1, PRKG1, LOXL1, RECK, ABCA6, ARHGDIB, TCF21, SGCD, TNFSF13, COL10A1, PLA2G15, MFAP4, HNMT, GAS6, SFRP4, COL6A2, TBX2, ZFPM2, ADARB1, FILIP1L, TLR2, EVC, NOX4, SSPN, A2M, HEPH
JI_CARCINOGENESIS_BY_KRAS_AND_STK11_DN	17	-1.87	0.001	4	LOXL1, C2, THBS2, TIMP1
					WDFY4	WDFY4
					ITPR1	WDFY4, ITPR1
					NRXN3	WDFY4, ITPR1, NRXN3
					HTR2C	WDFY4, ITPR1, NRXN3, HTR2C
					TTC8	WDFY4, ITPR1, NRXN3, HTR2C, TTC8
					CPS1	WDFY4, ITPR1, NRXN3, HTR2C, TTC8, CPS1
					MDM4	WDFY4, ITPR1, NRXN3, HTR2C, TTC8, CPS1, MDM4
					RORC	WDFY4, ITPR1, NRXN3, HTR2C, TTC8, CPS1, MDM4, RORC
					FGG	WDFY4, ITPR1, NRXN3, HTR2C, TTC8, CPS1, MDM4, RORC, FGG
					CAMKK1	WDFY4, ITPR1, NRXN3, HTR2C, TTC8, CPS1, MDM4, RORC, FGG, CAMKK1
					KLHL32	WDFY4, ITPR1, NRXN3, HTR2C, TTC8, CPS1, MDM4, RORC, FGG, CAMKK1, KLHL32
					NHEJ1	WDFY4, ITPR1, NRXN3, HTR2C, TTC8, CPS1, MDM4, RORC, FGG, CAMKK1, KLHL32, NHEJ1
					RPH3AL	WDFY4, ITPR1, NRXN3, HTR2C, TTC8, CPS1, MDM4, RORC, FGG, CAMKK1, KLHL32, NHEJ1, RPH3AL
					SLC26A9	WDFY4, ITPR1, NRXN3, HTR2C, TTC8, CPS1, MDM4, RORC, FGG, CAMKK1, KLHL32, NHEJ1, RPH3AL, SLC26A9
					KIAA0319	WDFY4, ITPR1, NRXN3, HTR2C, TTC8, CPS1, MDM4, RORC, FGG, CAMKK1, KLHL32, NHEJ1, RPH3AL, SLC26A9, KIAA0319
					DUOXA1	WDFY4, ITPR1, NRXN3, HTR2C, TTC8, CPS1, MDM4, RORC, FGG, CAMKK1, KLHL32, NHEJ1, RPH3AL, SLC26A9, KIAA0319, DUOXA1
					MYOM1	WDFY4, ITPR1, NRXN3, HTR2C, TTC8, CPS1, MDM4, RORC, FGG, CAMKK1, KLHL32, NHEJ1, RPH3AL, SLC26A9, KIAA0319, DUOXA1, MYOM1
					AR	WDFY4, ITPR1, NRXN3, HTR2C, TTC8, CPS1, MDM4, RORC, FGG, CAMKK1, KLHL32, NHEJ1, RPH3AL, SLC26A9, KIAA0319, DUOXA1, MYOM1, AR
					EXTL1	WDFY4, ITPR1, NRXN3, HTR2C, TTC8, CPS1, MDM4, RORC, FGG, CAMKK1, KLHL32, NHEJ1, RPH3AL, SLC26A9, KIAA0319, DUOXA1, MYOM1, AR, EXTL1
					ZNF444	WDFY4, ITPR1, NRXN3, HTR2C, TTC8, CPS1, MDM4, RORC, FGG, CAMKK1, KLHL32, NHEJ1, RPH3AL, SLC26A9, KIAA0319, DUOXA1, MYOM1, AR, EXTL1, ZNF444
					OAT	WDFY4, ITPR1, NRXN3, HTR2C, TTC8, CPS1, MDM4, RORC, FGG, CAMKK1, KLHL32, NHEJ1, RPH3AL, SLC26A9, KIAA0319, DUOXA1, MYOM1, AR, EXTL1, ZNF444, OAT
					BACE2	WDFY4, ITPR1, NRXN3, HTR2C, TTC8, CPS1, MDM4, RORC, FGG, CAMKK1, KLHL32, NHEJ1, RPH3AL, SLC26A9, KIAA0319, DUOXA1, MYOM1, AR, EXTL1, ZNF444, OAT, BACE2
					WNT4	WDFY4, ITPR1, NRXN3, HTR2C, TTC8, CPS1, MDM4, RORC, FGG, CAMKK1, KLHL32, NHEJ1, RPH3AL, SLC26A9, KIAA0319, DUOXA1, MYOM1, AR, EXTL1, ZNF444, OAT, BACE2, WNT4
					SETD4	WDFY4, ITPR1, NRXN3, HTR2C, TTC8, CPS1, MDM4, RORC, FGG, CAMKK1, KLHL32, NHEJ1, RPH3AL, SLC26A9, KIAA0319, DUOXA1, MYOM1, AR, EXTL1, ZNF444, OAT, BACE2, WNT4, SETD4
					MCTP2	WDFY4, ITPR1, NRXN3, HTR2C, TTC8, CPS1, MDM4, RORC, FGG, CAMKK1, KLHL32, NHEJ1, RPH3AL, SLC26A9, KIAA0319, DUOXA1, MYOM1, AR, EXTL1, ZNF444, OAT, BACE2, WNT4, SETD4, MCTP2
					ANKRD45	WDFY4, ITPR1, NRXN3, HTR2C, TTC8, CPS1, MDM4, RORC, FGG, CAMKK1, KLHL32, NHEJ1, RPH3AL, SLC26A9, KIAA0319, DUOXA1, MYOM1, AR, EXTL1, ZNF444, OAT, BACE2, WNT4, SETD4, MCTP2, ANKRD45
					PAIP2B	WDFY4, ITPR1, NRXN3, HTR2C, TTC8, CPS1, MDM4, RORC, FGG, CAMKK1, KLHL32, NHEJ1, RPH3AL, SLC26A9, KIAA0319, DUOXA1, MYOM1, AR, EXTL1, ZNF444, OAT, BACE2, WNT4, SETD4, MCTP2, ANKRD45, PAIP2B
					TRIM71	WDFY4, ITPR1, NRXN3, HTR2C, TTC8, CPS1, MDM4, RORC, FGG, CAMKK1, KLHL32, NHEJ1, RPH3AL, SLC26A9, KIAA0319, DUOXA1, MYOM1, AR, EXTL1, ZNF444, OAT, BACE2, WNT4, SETD4, MCTP2, ANKRD45, PAIP2B, TRIM71
					ATP8A1	WDFY4, ITPR1, NRXN3, HTR2C, TTC8, CPS1, MDM4, RORC, FGG, CAMKK1, KLHL32, NHEJ1, RPH3AL, SLC26A9, KIAA0319, DUOXA1, MYOM1, AR, EXTL1, ZNF444, OAT, BACE2, WNT4, SETD4, MCTP2, ANKRD45, PAIP2B, TRIM71, ATP8A1
					ADCK1	WDFY4, ITPR1, NRXN3, HTR2C, TTC8, CPS1, MDM4, RORC, FGG, CAMKK1, KLHL32, NHEJ1, RPH3AL, SLC26A9, KIAA0319, DUOXA1, MYOM1, AR, EXTL1, ZNF444, OAT, BACE2, WNT4, SETD4, MCTP2, ANKRD45, PAIP2B, TRIM71, ATP8A1, ADCK1
					PCSK1	WDFY4, ITPR1, NRXN3, HTR2C, TTC8, CPS1, MDM4, RORC, FGG, CAMKK1, KLHL32, NHEJ1, RPH3AL, SLC26A9, KIAA0319, DUOXA1, MYOM1, AR, EXTL1, ZNF444, OAT, BACE2, WNT4, SETD4, MCTP2, ANKRD45, PAIP2B, TRIM71, ATP8A1, ADCK1, PCSK1
					KLHL8	WDFY4, ITPR1, NRXN3, HTR2C, TTC8, CPS1, MDM4, RORC, FGG, CAMKK1, KLHL32, NHEJ1, RPH3AL, SLC26A9, KIAA0319, DUOXA1, MYOM1, AR, EXTL1, ZNF444, OAT, BACE2, WNT4, SETD4, MCTP2, ANKRD45, PAIP2B, TRIM71, ATP8A1, ADCK1, PCSK1, KLHL8
					SLC16A12	WDFY4, ITPR1, NRXN3, HTR2C, TTC8, CPS1, MDM4, RORC, FGG, CAMKK1, KLHL32, NHEJ1, RPH3AL, SLC26A9, KIAA0319, DUOXA1, MYOM1, AR, EXTL1, ZNF444, OAT, BACE2, WNT4, SETD4, MCTP2, ANKRD45, PAIP2B, TRIM71, ATP8A1, ADCK1, PCSK1, KLHL8, SLC16A12
					RET	WDFY4, ITPR1, NRXN3, HTR2C, TTC8, CPS1, MDM4, RORC, FGG, CAMKK1, KLHL32, NHEJ1, RPH3AL, SLC26A9, KIAA0319, DUOXA1, MYOM1, AR, EXTL1, ZNF444, OAT, BACE2, WNT4, SETD4, MCTP2, ANKRD45, PAIP2B, TRIM71, ATP8A1, ADCK1, PCSK1, KLHL8, SLC16A12, RET
					ALPL	WDFY4, ITPR1, NRXN3, HTR2C, TTC8, CPS1, MDM4, RORC, FGG, CAMKK1, KLHL32, NHEJ1, RPH3AL, SLC26A9, KIAA0319, DUOXA1, MYOM1, AR, EXTL1, ZNF444, OAT, BACE2, WNT4, SETD4, MCTP2, ANKRD45, PAIP2B, TRIM71, ATP8A1, ADCK1, PCSK1, KLHL8, SLC16A12, RET, ALPL
					ABLIM2	WDFY4, ITPR1, NRXN3, HTR2C, TTC8, CPS1, MDM4, RORC, FGG, CAMKK1, KLHL32, NHEJ1, RPH3AL, SLC26A9, KIAA0319, DUOXA1, MYOM1, AR, EXTL1, ZNF444, OAT, BACE2, WNT4, SETD4, MCTP2, ANKRD45, PAIP2B, TRIM71, ATP8A1, ADCK1, PCSK1, KLHL8, SLC16A12, RET, ALPL, ABLIM2
					HEPACAM2	WDFY4, ITPR1, NRXN3, HTR2C, TTC8, CPS1, MDM4, RORC, FGG, CAMKK1, KLHL32, NHEJ1, RPH3AL, SLC26A9, KIAA0319, DUOXA1, MYOM1, AR, EXTL1, ZNF444, OAT, BACE2, WNT4, SETD4, MCTP2, ANKRD45, PAIP2B, TRIM71, ATP8A1, ADCK1, PCSK1, KLHL8, SLC16A12, RET, ALPL, ABLIM2, HEPACAM2
					CPT1B	WDFY4, ITPR1, NRXN3, HTR2C, TTC8, CPS1, MDM4, RORC, FGG, CAMKK1, KLHL32, NHEJ1, RPH3AL, SLC26A9, KIAA0319, DUOXA1, MYOM1, AR, EXTL1, ZNF444, OAT, BACE2, WNT4, SETD4, MCTP2, ANKRD45, PAIP2B, TRIM71, ATP8A1, ADCK1, PCSK1, KLHL8, SLC16A12, RET, ALPL, ABLIM2, HEPACAM2, CPT1B
					GRIPAP1	WDFY4, ITPR1, NRXN3, HTR2C, TTC8, CPS1, MDM4, RORC, FGG, CAMKK1, KLHL32, NHEJ1, RPH3AL, SLC26A9, KIAA0319, DUOXA1, MYOM1, AR, EXTL1, ZNF444, OAT, BACE2, WNT4, SETD4, MCTP2, ANKRD45, PAIP2B, TRIM71, ATP8A1, ADCK1, PCSK1, KLHL8, SLC16A12, RET, ALPL, ABLIM2, HEPACAM2, CPT1B, GRIPAP1
					MTUS2	WDFY4, ITPR1, NRXN3, HTR2C, TTC8, CPS1, MDM4, RORC, FGG, CAMKK1, KLHL32, NHEJ1, RPH3AL, SLC26A9, KIAA0319, DUOXA1, MYOM1, AR, EXTL1, ZNF444, OAT, BACE2, WNT4, SETD4, MCTP2, ANKRD45, PAIP2B, TRIM71, ATP8A1, ADCK1, PCSK1, KLHL8, SLC16A12, RET, ALPL, ABLIM2, HEPACAM2, CPT1B, GRIPAP1, MTUS2
					SLC46A3	WDFY4, ITPR1, NRXN3, HTR2C, TTC8, CPS1, MDM4, RORC, FGG, CAMKK1, KLHL32, NHEJ1, RPH3AL, SLC26A9, KIAA0319, DUOXA1, MYOM1, AR, EXTL1, ZNF444, OAT, BACE2, WNT4, SETD4, MCTP2, ANKRD45, PAIP2B, TRIM71, ATP8A1, ADCK1, PCSK1, KLHL8, SLC16A12, RET, ALPL, ABLIM2, HEPACAM2, CPT1B, GRIPAP1, MTUS2, SLC46A3
					GPRC5C	WDFY4, ITPR1, NRXN3, HTR2C, TTC8, CPS1, MDM4, RORC, FGG, CAMKK1, KLHL32, NHEJ1, RPH3AL, SLC26A9, KIAA0319, DUOXA1, MYOM1, AR, EXTL1, ZNF444, OAT, BACE2, WNT4, SETD4, MCTP2, ANKRD45, PAIP2B, TRIM71, ATP8A1, ADCK1, PCSK1, KLHL8, SLC16A12, RET, ALPL, ABLIM2, HEPACAM2, CPT1B, GRIPAP1, MTUS2, SLC46A3, GPRC5C
					TBC1D19	WDFY4, ITPR1, NRXN3, HTR2C, TTC8, CPS1, MDM4, RORC, FGG, CAMKK1, KLHL32, NHEJ1, RPH3AL, SLC26A9, KIAA0319, DUOXA1, MYOM1, AR, EXTL1, ZNF444, OAT, BACE2, WNT4, SETD4, MCTP2, ANKRD45, PAIP2B, TRIM71, ATP8A1, ADCK1, PCSK1, KLHL8, SLC16A12, RET, ALPL, ABLIM2, HEPACAM2, CPT1B, GRIPAP1, MTUS2, SLC46A3, GPRC5C, TBC1D19
					ASXL3	WDFY4, ITPR1, NRXN3, HTR2C, TTC8, CPS1, MDM4, RORC, FGG, CAMKK1, KLHL32, NHEJ1, RPH3AL, SLC26A9, KIAA0319, DUOXA1, MYOM1, AR, EXTL1, ZNF444, OAT, BACE2, WNT4, SETD4, MCTP2, ANKRD45, PAIP2B, TRIM71, ATP8A1, ADCK1, PCSK1, KLHL8, SLC16A12, RET, ALPL, ABLIM2, HEPACAM2, CPT1B, GRIPAP1, MTUS2, SLC46A3, GPRC5C, TBC1D19, ASXL3
					MEGF9	WDFY4, ITPR1, NRXN3, HTR2C, TTC8, CPS1, MDM4, RORC, FGG, CAMKK1, KLHL32, NHEJ1, RPH3AL, SLC26A9, KIAA0319, DUOXA1, MYOM1, AR, EXTL1, ZNF444, OAT, BACE2, WNT4, SETD4, MCTP2, ANKRD45, PAIP2B, TRIM71, ATP8A1, ADCK1, PCSK1, KLHL8, SLC16A12, RET, ALPL, ABLIM2, HEPACAM2, CPT1B, GRIPAP1, MTUS2, SLC46A3, GPRC5C, TBC1D19, ASXL3, MEGF9
					PNPLA7	WDFY4, ITPR1, NRXN3, HTR2C, TTC8, CPS1, MDM4, RORC, FGG, CAMKK1, KLHL32, NHEJ1, RPH3AL, SLC26A9, KIAA0319, DUOXA1, MYOM1, AR, EXTL1, ZNF444, OAT, BACE2, WNT4, SETD4, MCTP2, ANKRD45, PAIP2B, TRIM71, ATP8A1, ADCK1, PCSK1, KLHL8, SLC16A12, RET, ALPL, ABLIM2, HEPACAM2, CPT1B, GRIPAP1, MTUS2, SLC46A3, GPRC5C, TBC1D19, ASXL3, MEGF9, PNPLA7
					TSPYL2	WDFY4, ITPR1, NRXN3, HTR2C, TTC8, CPS1, MDM4, RORC, FGG, CAMKK1, KLHL32, NHEJ1, RPH3AL, SLC26A9, KIAA0319, DUOXA1, MYOM1, AR, EXTL1, ZNF444, OAT, BACE2, WNT4, SETD4, MCTP2, ANKRD45, PAIP2B, TRIM71, ATP8A1, ADCK1, PCSK1, KLHL8, SLC16A12, RET, ALPL, ABLIM2, HEPACAM2, CPT1B, GRIPAP1, MTUS2, SLC46A3, GPRC5C, TBC1D19, ASXL3, MEGF9, PNPLA7, TSPYL2
					ZC3H7A	WDFY4, ITPR1, NRXN3, HTR2C, TTC8, CPS1, MDM4, RORC, FGG, CAMKK1, KLHL32, NHEJ1, RPH3AL, SLC26A9, KIAA0319, DUOXA1, MYOM1, AR, EXTL1, ZNF444, OAT, BACE2, WNT4, SETD4, MCTP2, ANKRD45, PAIP2B, TRIM71, ATP8A1, ADCK1, PCSK1, KLHL8, SLC16A12, RET, ALPL, ABLIM2, HEPACAM2, CPT1B, GRIPAP1, MTUS2, SLC46A3, GPRC5C, TBC1D19, ASXL3, MEGF9, PNPLA7, TSPYL2, ZC3H7A
					DISC1	WDFY4, ITPR1, NRXN3, HTR2C, TTC8, CPS1, MDM4, RORC, FGG, CAMKK1, KLHL32, NHEJ1, RPH3AL, SLC26A9, KIAA0319, DUOXA1, MYOM1, AR, EXTL1, ZNF444, OAT, BACE2, WNT4, SETD4, MCTP2, ANKRD45, PAIP2B, TRIM71, ATP8A1, ADCK1, PCSK1, KLHL8, SLC16A12, RET, ALPL, ABLIM2, HEPACAM2, CPT1B, GRIPAP1, MTUS2, SLC46A3, GPRC5C, TBC1D19, ASXL3, MEGF9, PNPLA7, TSPYL2, ZC3H7A, DISC1
					IGFBP5	WDFY4, ITPR1, NRXN3, HTR2C, TTC8, CPS1, MDM4, RORC, FGG, CAMKK1, KLHL32, NHEJ1, RPH3AL, SLC26A9, KIAA0319, DUOXA1, MYOM1, AR, EXTL1, ZNF444, OAT, BACE2, WNT4, SETD4, MCTP2, ANKRD45, PAIP2B, TRIM71, ATP8A1, ADCK1, PCSK1, KLHL8, SLC16A12, RET, ALPL, ABLIM2, HEPACAM2, CPT1B, GRIPAP1, MTUS2, SLC46A3, GPRC5C, TBC1D19, ASXL3, MEGF9, PNPLA7, TSPYL2, ZC3H7A, DISC1, IGFBP5
					KLK14	WDFY4, ITPR1, NRXN3, HTR2C, TTC8, CPS1, MDM4, RORC, FGG, CAMKK1, KLHL32, NHEJ1, RPH3AL, SLC26A9, KIAA0319, DUOXA1, MYOM1, AR, EXTL1, ZNF444, OAT, BACE2, WNT4, SETD4, MCTP2, ANKRD45, PAIP2B, TRIM71, ATP8A1, ADCK1, PCSK1, KLHL8, SLC16A12, RET, ALPL, ABLIM2, HEPACAM2, CPT1B, GRIPAP1, MTUS2, SLC46A3, GPRC5C, TBC1D19, ASXL3, MEGF9, PNPLA7, TSPYL2, ZC3H7A, DISC1, IGFBP5, KLK14
					ANKRD16	WDFY4, ITPR1, NRXN3, HTR2C, TTC8, CPS1, MDM4, RORC, FGG, CAMKK1, KLHL32, NHEJ1, RPH3AL, SLC26A9, KIAA0319, DUOXA1, MYOM1, AR, EXTL1, ZNF444, OAT, BACE2, WNT4, SETD4, MCTP2, ANKRD45, PAIP2B, TRIM71, ATP8A1, ADCK1, PCSK1, KLHL8, SLC16A12, RET, ALPL, ABLIM2, HEPACAM2, CPT1B, GRIPAP1, MTUS2, SLC46A3, GPRC5C, TBC1D19, ASXL3, MEGF9, PNPLA7, TSPYL2, ZC3H7A, DISC1, IGFBP5, KLK14, ANKRD16
					PHPT1	WDFY4, ITPR1, NRXN3, HTR2C, TTC8, CPS1, MDM4, RORC, FGG, CAMKK1, KLHL32, NHEJ1, RPH3AL, SLC26A9, KIAA0319, DUOXA1, MYOM1, AR, EXTL1, ZNF444, OAT, BACE2, WNT4, SETD4, MCTP2, ANKRD45, PAIP2B, TRIM71, ATP8A1, ADCK1, PCSK1, KLHL8, SLC16A12, RET, ALPL, ABLIM2, HEPACAM2, CPT1B, GRIPAP1, MTUS2, SLC46A3, GPRC5C, TBC1D19, ASXL3, MEGF9, PNPLA7, TSPYL2, ZC3H7A, DISC1, IGFBP5, KLK14, ANKRD16, PHPT1
					PHKA1	WDFY4, ITPR1, NRXN3, HTR2C, TTC8, CPS1, MDM4, RORC, FGG, CAMKK1, KLHL32, NHEJ1, RPH3AL, SLC26A9, KIAA0319, DUOXA1, MYOM1, AR, EXTL1, ZNF444, OAT, BACE2, WNT4, SETD4, MCTP2, ANKRD45, PAIP2B, TRIM71, ATP8A1, ADCK1, PCSK1, KLHL8, SLC16A12, RET, ALPL, ABLIM2, HEPACAM2, CPT1B, GRIPAP1, MTUS2, SLC46A3, GPRC5C, TBC1D19, ASXL3, MEGF9, PNPLA7, TSPYL2, ZC3H7A, DISC1, IGFBP5, KLK14, ANKRD16, PHPT1, PHKA1
					HSD11B2	WDFY4, ITPR1, NRXN3, HTR2C, TTC8, CPS1, MDM4, RORC, FGG, CAMKK1, KLHL32, NHEJ1, RPH3AL, SLC26A9, KIAA0319, DUOXA1, MYOM1, AR, EXTL1, ZNF444, OAT, BACE2, WNT4, SETD4, MCTP2, ANKRD45, PAIP2B, TRIM71, ATP8A1, ADCK1, PCSK1, KLHL8, SLC16A12, RET, ALPL, ABLIM2, HEPACAM2, CPT1B, GRIPAP1, MTUS2, SLC46A3, GPRC5C, TBC1D19, ASXL3, MEGF9, PNPLA7, TSPYL2, ZC3H7A, DISC1, IGFBP5, KLK14, ANKRD16, PHPT1, PHKA1, H…
					ADAMTS19	WDFY4, ITPR1, NRXN3, HTR2C, TTC8, CPS1, MDM4, RORC, FGG, CAMKK1, KLHL32, NHEJ1, RPH3AL, SLC26A9, KIAA0319, DUOXA1, MYOM1, AR, EXTL1, ZNF444, OAT, BACE2, WNT4, SETD4, MCTP2, ANKRD45, PAIP2B, TRIM71, ATP8A1, ADCK1, PCSK1, KLHL8, SLC16A12, RET, ALPL, ABLIM2, HEPACAM2, CPT1B, GRIPAP1, MTUS2, SLC46A3, GPRC5C, TBC1D19, ASXL3, MEGF9, PNPLA7, TSPYL2, ZC3H7A, DISC1, IGFBP5, KLK14, ANKRD16, PHPT1, PHKA1, H…
					RGS7	WDFY4, ITPR1, NRXN3, HTR2C, TTC8, CPS1, MDM4, RORC, FGG, CAMKK1, KLHL32, NHEJ1, RPH3AL, SLC26A9, KIAA0319, DUOXA1, MYOM1, AR, EXTL1, ZNF444, OAT, BACE2, WNT4, SETD4, MCTP2, ANKRD45, PAIP2B, TRIM71, ATP8A1, ADCK1, PCSK1, KLHL8, SLC16A12, RET, ALPL, ABLIM2, HEPACAM2, CPT1B, GRIPAP1, MTUS2, SLC46A3, GPRC5C, TBC1D19, ASXL3, MEGF9, PNPLA7, TSPYL2, ZC3H7A, DISC1, IGFBP5, KLK14, ANKRD16, PHPT1, PHKA1, H…
					KCNJ8	WDFY4, ITPR1, NRXN3, HTR2C, TTC8, CPS1, MDM4, RORC, FGG, CAMKK1, KLHL32, NHEJ1, RPH3AL, SLC26A9, KIAA0319, DUOXA1, MYOM1, AR, EXTL1, ZNF444, OAT, BACE2, WNT4, SETD4, MCTP2, ANKRD45, PAIP2B, TRIM71, ATP8A1, ADCK1, PCSK1, KLHL8, SLC16A12, RET, ALPL, ABLIM2, HEPACAM2, CPT1B, GRIPAP1, MTUS2, SLC46A3, GPRC5C, TBC1D19, ASXL3, MEGF9, PNPLA7, TSPYL2, ZC3H7A, DISC1, IGFBP5, KLK14, ANKRD16, PHPT1, PHKA1, H…
					DOC2B	WDFY4, ITPR1, NRXN3, HTR2C, TTC8, CPS1, MDM4, RORC, FGG, CAMKK1, KLHL32, NHEJ1, RPH3AL, SLC26A9, KIAA0319, DUOXA1, MYOM1, AR, EXTL1, ZNF444, OAT, BACE2, WNT4, SETD4, MCTP2, ANKRD45, PAIP2B, TRIM71, ATP8A1, ADCK1, PCSK1, KLHL8, SLC16A12, RET, ALPL, ABLIM2, HEPACAM2, CPT1B, GRIPAP1, MTUS2, SLC46A3, GPRC5C, TBC1D19, ASXL3, MEGF9, PNPLA7, TSPYL2, ZC3H7A, DISC1, IGFBP5, KLK14, ANKRD16, PHPT1, PHKA1, H…
					NOS1	WDFY4, ITPR1, NRXN3, HTR2C, TTC8, CPS1, MDM4, RORC, FGG, CAMKK1, KLHL32, NHEJ1, RPH3AL, SLC26A9, KIAA0319, DUOXA1, MYOM1, AR, EXTL1, ZNF444, OAT, BACE2, WNT4, SETD4, MCTP2, ANKRD45, PAIP2B, TRIM71, ATP8A1, ADCK1, PCSK1, KLHL8, SLC16A12, RET, ALPL, ABLIM2, HEPACAM2, CPT1B, GRIPAP1, MTUS2, SLC46A3, GPRC5C, TBC1D19, ASXL3, MEGF9, PNPLA7, TSPYL2, ZC3H7A, DISC1, IGFBP5, KLK14, ANKRD16, PHPT1, PHKA1, H…
					CLEC3B	WDFY4, ITPR1, NRXN3, HTR2C, TTC8, CPS1, MDM4, RORC, FGG, CAMKK1, KLHL32, NHEJ1, RPH3AL, SLC26A9, KIAA0319, DUOXA1, MYOM1, AR, EXTL1, ZNF444, OAT, BACE2, WNT4, SETD4, MCTP2, ANKRD45, PAIP2B, TRIM71, ATP8A1, ADCK1, PCSK1, KLHL8, SLC16A12, RET, ALPL, ABLIM2, HEPACAM2, CPT1B, GRIPAP1, MTUS2, SLC46A3, GPRC5C, TBC1D19, ASXL3, MEGF9, PNPLA7, TSPYL2, ZC3H7A, DISC1, IGFBP5, KLK14, ANKRD16, PHPT1, PHKA1, H…
					RNF180	WDFY4, ITPR1, NRXN3, HTR2C, TTC8, CPS1, MDM4, RORC, FGG, CAMKK1, KLHL32, NHEJ1, RPH3AL, SLC26A9, KIAA0319, DUOXA1, MYOM1, AR, EXTL1, ZNF444, OAT, BACE2, WNT4, SETD4, MCTP2, ANKRD45, PAIP2B, TRIM71, ATP8A1, ADCK1, PCSK1, KLHL8, SLC16A12, RET, ALPL, ABLIM2, HEPACAM2, CPT1B, GRIPAP1, MTUS2, SLC46A3, GPRC5C, TBC1D19, ASXL3, MEGF9, PNPLA7, TSPYL2, ZC3H7A, DISC1, IGFBP5, KLK14, ANKRD16, PHPT1, PHKA1, H…
					KCNK10	WDFY4, ITPR1, NRXN3, HTR2C, TTC8, CPS1, MDM4, RORC, FGG, CAMKK1, KLHL32, NHEJ1, RPH3AL, SLC26A9, KIAA0319, DUOXA1, MYOM1, AR, EXTL1, ZNF444, OAT, BACE2, WNT4, SETD4, MCTP2, ANKRD45, PAIP2B, TRIM71, ATP8A1, ADCK1, PCSK1, KLHL8, SLC16A12, RET, ALPL, ABLIM2, HEPACAM2, CPT1B, GRIPAP1, MTUS2, SLC46A3, GPRC5C, TBC1D19, ASXL3, MEGF9, PNPLA7, TSPYL2, ZC3H7A, DISC1, IGFBP5, KLK14, ANKRD16, PHPT1, PHKA1, H…
					DCXR	WDFY4, ITPR1, NRXN3, HTR2C, TTC8, CPS1, MDM4, RORC, FGG, CAMKK1, KLHL32, NHEJ1, RPH3AL, SLC26A9, KIAA0319, DUOXA1, MYOM1, AR, EXTL1, ZNF444, OAT, BACE2, WNT4, SETD4, MCTP2, ANKRD45, PAIP2B, TRIM71, ATP8A1, ADCK1, PCSK1, KLHL8, SLC16A12, RET, ALPL, ABLIM2, HEPACAM2, CPT1B, GRIPAP1, MTUS2, SLC46A3, GPRC5C, TBC1D19, ASXL3, MEGF9, PNPLA7, TSPYL2, ZC3H7A, DISC1, IGFBP5, KLK14, ANKRD16, PHPT1, PHKA1, H…
					NUDT13	WDFY4, ITPR1, NRXN3, HTR2C, TTC8, CPS1, MDM4, RORC, FGG, CAMKK1, KLHL32, NHEJ1, RPH3AL, SLC26A9, KIAA0319, DUOXA1, MYOM1, AR, EXTL1, ZNF444, OAT, BACE2, WNT4, SETD4, MCTP2, ANKRD45, PAIP2B, TRIM71, ATP8A1, ADCK1, PCSK1, KLHL8, SLC16A12, RET, ALPL, ABLIM2, HEPACAM2, CPT1B, GRIPAP1, MTUS2, SLC46A3, GPRC5C, TBC1D19, ASXL3, MEGF9, PNPLA7, TSPYL2, ZC3H7A, DISC1, IGFBP5, KLK14, ANKRD16, PHPT1, PHKA1, H…
					TTC12	WDFY4, ITPR1, NRXN3, HTR2C, TTC8, CPS1, MDM4, RORC, FGG, CAMKK1, KLHL32, NHEJ1, RPH3AL, SLC26A9, KIAA0319, DUOXA1, MYOM1, AR, EXTL1, ZNF444, OAT, BACE2, WNT4, SETD4, MCTP2, ANKRD45, PAIP2B, TRIM71, ATP8A1, ADCK1, PCSK1, KLHL8, SLC16A12, RET, ALPL, ABLIM2, HEPACAM2, CPT1B, GRIPAP1, MTUS2, SLC46A3, GPRC5C, TBC1D19, ASXL3, MEGF9, PNPLA7, TSPYL2, ZC3H7A, DISC1, IGFBP5, KLK14, ANKRD16, PHPT1, PHKA1, H…
					C2	WDFY4, ITPR1, NRXN3, HTR2C, TTC8, CPS1, MDM4, RORC, FGG, CAMKK1, KLHL32, NHEJ1, RPH3AL, SLC26A9, KIAA0319, DUOXA1, MYOM1, AR, EXTL1, ZNF444, OAT, BACE2, WNT4, SETD4, MCTP2, ANKRD45, PAIP2B, TRIM71, ATP8A1, ADCK1, PCSK1, KLHL8, SLC16A12, RET, ALPL, ABLIM2, HEPACAM2, CPT1B, GRIPAP1, MTUS2, SLC46A3, GPRC5C, TBC1D19, ASXL3, MEGF9, PNPLA7, TSPYL2, ZC3H7A, DISC1, IGFBP5, KLK14, ANKRD16, PHPT1, PHKA1, H…
					MYLK3	WDFY4, ITPR1, NRXN3, HTR2C, TTC8, CPS1, MDM4, RORC, FGG, CAMKK1, KLHL32, NHEJ1, RPH3AL, SLC26A9, KIAA0319, DUOXA1, MYOM1, AR, EXTL1, ZNF444, OAT, BACE2, WNT4, SETD4, MCTP2, ANKRD45, PAIP2B, TRIM71, ATP8A1, ADCK1, PCSK1, KLHL8, SLC16A12, RET, ALPL, ABLIM2, HEPACAM2, CPT1B, GRIPAP1, MTUS2, SLC46A3, GPRC5C, TBC1D19, ASXL3, MEGF9, PNPLA7, TSPYL2, ZC3H7A, DISC1, IGFBP5, KLK14, ANKRD16, PHPT1, PHKA1, H…
					ABCC2	WDFY4, ITPR1, NRXN3, HTR2C, TTC8, CPS1, MDM4, RORC, FGG, CAMKK1, KLHL32, NHEJ1, RPH3AL, SLC26A9, KIAA0319, DUOXA1, MYOM1, AR, EXTL1, ZNF444, OAT, BACE2, WNT4, SETD4, MCTP2, ANKRD45, PAIP2B, TRIM71, ATP8A1, ADCK1, PCSK1, KLHL8, SLC16A12, RET, ALPL, ABLIM2, HEPACAM2, CPT1B, GRIPAP1, MTUS2, SLC46A3, GPRC5C, TBC1D19, ASXL3, MEGF9, PNPLA7, TSPYL2, ZC3H7A, DISC1, IGFBP5, KLK14, ANKRD16, PHPT1, PHKA1, H…
					DCAF11	WDFY4, ITPR1, NRXN3, HTR2C, TTC8, CPS1, MDM4, RORC, FGG, CAMKK1, KLHL32, NHEJ1, RPH3AL, SLC26A9, KIAA0319, DUOXA1, MYOM1, AR, EXTL1, ZNF444, OAT, BACE2, WNT4, SETD4, MCTP2, ANKRD45, PAIP2B, TRIM71, ATP8A1, ADCK1, PCSK1, KLHL8, SLC16A12, RET, ALPL, ABLIM2, HEPACAM2, CPT1B, GRIPAP1, MTUS2, SLC46A3, GPRC5C, TBC1D19, ASXL3, MEGF9, PNPLA7, TSPYL2, ZC3H7A, DISC1, IGFBP5, KLK14, ANKRD16, PHPT1, PHKA1, H…
					L3MBTL4	WDFY4, ITPR1, NRXN3, HTR2C, TTC8, CPS1, MDM4, RORC, FGG, CAMKK1, KLHL32, NHEJ1, RPH3AL, SLC26A9, KIAA0319, DUOXA1, MYOM1, AR, EXTL1, ZNF444, OAT, BACE2, WNT4, SETD4, MCTP2, ANKRD45, PAIP2B, TRIM71, ATP8A1, ADCK1, PCSK1, KLHL8, SLC16A12, RET, ALPL, ABLIM2, HEPACAM2, CPT1B, GRIPAP1, MTUS2, SLC46A3, GPRC5C, TBC1D19, ASXL3, MEGF9, PNPLA7, TSPYL2, ZC3H7A, DISC1, IGFBP5, KLK14, ANKRD16, PHPT1, PHKA1, H…
					ABCB4	WDFY4, ITPR1, NRXN3, HTR2C, TTC8, CPS1, MDM4, RORC, FGG, CAMKK1, KLHL32, NHEJ1, RPH3AL, SLC26A9, KIAA0319, DUOXA1, MYOM1, AR, EXTL1, ZNF444, OAT, BACE2, WNT4, SETD4, MCTP2, ANKRD45, PAIP2B, TRIM71, ATP8A1, ADCK1, PCSK1, KLHL8, SLC16A12, RET, ALPL, ABLIM2, HEPACAM2, CPT1B, GRIPAP1, MTUS2, SLC46A3, GPRC5C, TBC1D19, ASXL3, MEGF9, PNPLA7, TSPYL2, ZC3H7A, DISC1, IGFBP5, KLK14, ANKRD16, PHPT1, PHKA1, H…
					DSG4	WDFY4, ITPR1, NRXN3, HTR2C, TTC8, CPS1, MDM4, RORC, FGG, CAMKK1, KLHL32, NHEJ1, RPH3AL, SLC26A9, KIAA0319, DUOXA1, MYOM1, AR, EXTL1, ZNF444, OAT, BACE2, WNT4, SETD4, MCTP2, ANKRD45, PAIP2B, TRIM71, ATP8A1, ADCK1, PCSK1, KLHL8, SLC16A12, RET, ALPL, ABLIM2, HEPACAM2, CPT1B, GRIPAP1, MTUS2, SLC46A3, GPRC5C, TBC1D19, ASXL3, MEGF9, PNPLA7, TSPYL2, ZC3H7A, DISC1, IGFBP5, KLK14, ANKRD16, PHPT1, PHKA1, H…
					PIK3C2G	WDFY4, ITPR1, NRXN3, HTR2C, TTC8, CPS1, MDM4, RORC, FGG, CAMKK1, KLHL32, NHEJ1, RPH3AL, SLC26A9, KIAA0319, DUOXA1, MYOM1, AR, EXTL1, ZNF444, OAT, BACE2, WNT4, SETD4, MCTP2, ANKRD45, PAIP2B, TRIM71, ATP8A1, ADCK1, PCSK1, KLHL8, SLC16A12, RET, ALPL, ABLIM2, HEPACAM2, CPT1B, GRIPAP1, MTUS2, SLC46A3, GPRC5C, TBC1D19, ASXL3, MEGF9, PNPLA7, TSPYL2, ZC3H7A, DISC1, IGFBP5, KLK14, ANKRD16, PHPT1, PHKA1, H…
					ACACB	WDFY4, ITPR1, NRXN3, HTR2C, TTC8, CPS1, MDM4, RORC, FGG, CAMKK1, KLHL32, NHEJ1, RPH3AL, SLC26A9, KIAA0319, DUOXA1, MYOM1, AR, EXTL1, ZNF444, OAT, BACE2, WNT4, SETD4, MCTP2, ANKRD45, PAIP2B, TRIM71, ATP8A1, ADCK1, PCSK1, KLHL8, SLC16A12, RET, ALPL, ABLIM2, HEPACAM2, CPT1B, GRIPAP1, MTUS2, SLC46A3, GPRC5C, TBC1D19, ASXL3, MEGF9, PNPLA7, TSPYL2, ZC3H7A, DISC1, IGFBP5, KLK14, ANKRD16, PHPT1, PHKA1, H…
					HAP1	WDFY4, ITPR1, NRXN3, HTR2C, TTC8, CPS1, MDM4, RORC, FGG, CAMKK1, KLHL32, NHEJ1, RPH3AL, SLC26A9, KIAA0319, DUOXA1, MYOM1, AR, EXTL1, ZNF444, OAT, BACE2, WNT4, SETD4, MCTP2, ANKRD45, PAIP2B, TRIM71, ATP8A1, ADCK1, PCSK1, KLHL8, SLC16A12, RET, ALPL, ABLIM2, HEPACAM2, CPT1B, GRIPAP1, MTUS2, SLC46A3, GPRC5C, TBC1D19, ASXL3, MEGF9, PNPLA7, TSPYL2, ZC3H7A, DISC1, IGFBP5, KLK14, ANKRD16, PHPT1, PHKA1, H…
					C10orf71	WDFY4, ITPR1, NRXN3, HTR2C, TTC8, CPS1, MDM4, RORC, FGG, CAMKK1, KLHL32, NHEJ1, RPH3AL, SLC26A9, KIAA0319, DUOXA1, MYOM1, AR, EXTL1, ZNF444, OAT, BACE2, WNT4, SETD4, MCTP2, ANKRD45, PAIP2B, TRIM71, ATP8A1, ADCK1, PCSK1, KLHL8, SLC16A12, RET, ALPL, ABLIM2, HEPACAM2, CPT1B, GRIPAP1, MTUS2, SLC46A3, GPRC5C, TBC1D19, ASXL3, MEGF9, PNPLA7, TSPYL2, ZC3H7A, DISC1, IGFBP5, KLK14, ANKRD16, PHPT1, PHKA1, H…
					HCN4	WDFY4, ITPR1, NRXN3, HTR2C, TTC8, CPS1, MDM4, RORC, FGG, CAMKK1, KLHL32, NHEJ1, RPH3AL, SLC26A9, KIAA0319, DUOXA1, MYOM1, AR, EXTL1, ZNF444, OAT, BACE2, WNT4, SETD4, MCTP2, ANKRD45, PAIP2B, TRIM71, ATP8A1, ADCK1, PCSK1, KLHL8, SLC16A12, RET, ALPL, ABLIM2, HEPACAM2, CPT1B, GRIPAP1, MTUS2, SLC46A3, GPRC5C, TBC1D19, ASXL3, MEGF9, PNPLA7, TSPYL2, ZC3H7A, DISC1, IGFBP5, KLK14, ANKRD16, PHPT1, PHKA1, H…
					DSG1	WDFY4, ITPR1, NRXN3, HTR2C, TTC8, CPS1, MDM4, RORC, FGG, CAMKK1, KLHL32, NHEJ1, RPH3AL, SLC26A9, KIAA0319, DUOXA1, MYOM1, AR, EXTL1, ZNF444, OAT, BACE2, WNT4, SETD4, MCTP2, ANKRD45, PAIP2B, TRIM71, ATP8A1, ADCK1, PCSK1, KLHL8, SLC16A12, RET, ALPL, ABLIM2, HEPACAM2, CPT1B, GRIPAP1, MTUS2, SLC46A3, GPRC5C, TBC1D19, ASXL3, MEGF9, PNPLA7, TSPYL2, ZC3H7A, DISC1, IGFBP5, KLK14, ANKRD16, PHPT1, PHKA1, H…
					MAPK15	WDFY4, ITPR1, NRXN3, HTR2C, TTC8, CPS1, MDM4, RORC, FGG, CAMKK1, KLHL32, NHEJ1, RPH3AL, SLC26A9, KIAA0319, DUOXA1, MYOM1, AR, EXTL1, ZNF444, OAT, BACE2, WNT4, SETD4, MCTP2, ANKRD45, PAIP2B, TRIM71, ATP8A1, ADCK1, PCSK1, KLHL8, SLC16A12, RET, ALPL, ABLIM2, HEPACAM2, CPT1B, GRIPAP1, MTUS2, SLC46A3, GPRC5C, TBC1D19, ASXL3, MEGF9, PNPLA7, TSPYL2, ZC3H7A, DISC1, IGFBP5, KLK14, ANKRD16, PHPT1, PHKA1, H…
					CHODL	WDFY4, ITPR1, NRXN3, HTR2C, TTC8, CPS1, MDM4, RORC, FGG, CAMKK1, KLHL32, NHEJ1, RPH3AL, SLC26A9, KIAA0319, DUOXA1, MYOM1, AR, EXTL1, ZNF444, OAT, BACE2, WNT4, SETD4, MCTP2, ANKRD45, PAIP2B, TRIM71, ATP8A1, ADCK1, PCSK1, KLHL8, SLC16A12, RET, ALPL, ABLIM2, HEPACAM2, CPT1B, GRIPAP1, MTUS2, SLC46A3, GPRC5C, TBC1D19, ASXL3, MEGF9, PNPLA7, TSPYL2, ZC3H7A, DISC1, IGFBP5, KLK14, ANKRD16, PHPT1, PHKA1, H…
					CD46	WDFY4, ITPR1, NRXN3, HTR2C, TTC8, CPS1, MDM4, RORC, FGG, CAMKK1, KLHL32, NHEJ1, RPH3AL, SLC26A9, KIAA0319, DUOXA1, MYOM1, AR, EXTL1, ZNF444, OAT, BACE2, WNT4, SETD4, MCTP2, ANKRD45, PAIP2B, TRIM71, ATP8A1, ADCK1, PCSK1, KLHL8, SLC16A12, RET, ALPL, ABLIM2, HEPACAM2, CPT1B, GRIPAP1, MTUS2, SLC46A3, GPRC5C, TBC1D19, ASXL3, MEGF9, PNPLA7, TSPYL2, ZC3H7A, DISC1, IGFBP5, KLK14, ANKRD16, PHPT1, PHKA1, H…
					MARK1	WDFY4, ITPR1, NRXN3, HTR2C, TTC8, CPS1, MDM4, RORC, FGG, CAMKK1, KLHL32, NHEJ1, RPH3AL, SLC26A9, KIAA0319, DUOXA1, MYOM1, AR, EXTL1, ZNF444, OAT, BACE2, WNT4, SETD4, MCTP2, ANKRD45, PAIP2B, TRIM71, ATP8A1, ADCK1, PCSK1, KLHL8, SLC16A12, RET, ALPL, ABLIM2, HEPACAM2, CPT1B, GRIPAP1, MTUS2, SLC46A3, GPRC5C, TBC1D19, ASXL3, MEGF9, PNPLA7, TSPYL2, ZC3H7A, DISC1, IGFBP5, KLK14, ANKRD16, PHPT1, PHKA1, H…
					MYO16	WDFY4, ITPR1, NRXN3, HTR2C, TTC8, CPS1, MDM4, RORC, FGG, CAMKK1, KLHL32, NHEJ1, RPH3AL, SLC26A9, KIAA0319, DUOXA1, MYOM1, AR, EXTL1, ZNF444, OAT, BACE2, WNT4, SETD4, MCTP2, ANKRD45, PAIP2B, TRIM71, ATP8A1, ADCK1, PCSK1, KLHL8, SLC16A12, RET, ALPL, ABLIM2, HEPACAM2, CPT1B, GRIPAP1, MTUS2, SLC46A3, GPRC5C, TBC1D19, ASXL3, MEGF9, PNPLA7, TSPYL2, ZC3H7A, DISC1, IGFBP5, KLK14, ANKRD16, PHPT1, PHKA1, H…
					CLDN10	WDFY4, ITPR1, NRXN3, HTR2C, TTC8, CPS1, MDM4, RORC, FGG, CAMKK1, KLHL32, NHEJ1, RPH3AL, SLC26A9, KIAA0319, DUOXA1, MYOM1, AR, EXTL1, ZNF444, OAT, BACE2, WNT4, SETD4, MCTP2, ANKRD45, PAIP2B, TRIM71, ATP8A1, ADCK1, PCSK1, KLHL8, SLC16A12, RET, ALPL, ABLIM2, HEPACAM2, CPT1B, GRIPAP1, MTUS2, SLC46A3, GPRC5C, TBC1D19, ASXL3, MEGF9, PNPLA7, TSPYL2, ZC3H7A, DISC1, IGFBP5, KLK14, ANKRD16, PHPT1, PHKA1, H…
					ACTC1	WDFY4, ITPR1, NRXN3, HTR2C, TTC8, CPS1, MDM4, RORC, FGG, CAMKK1, KLHL32, NHEJ1, RPH3AL, SLC26A9, KIAA0319, DUOXA1, MYOM1, AR, EXTL1, ZNF444, OAT, BACE2, WNT4, SETD4, MCTP2, ANKRD45, PAIP2B, TRIM71, ATP8A1, ADCK1, PCSK1, KLHL8, SLC16A12, RET, ALPL, ABLIM2, HEPACAM2, CPT1B, GRIPAP1, MTUS2, SLC46A3, GPRC5C, TBC1D19, ASXL3, MEGF9, PNPLA7, TSPYL2, ZC3H7A, DISC1, IGFBP5, KLK14, ANKRD16, PHPT1, PHKA1, H…
					AKR1C1	WDFY4, ITPR1, NRXN3, HTR2C, TTC8, CPS1, MDM4, RORC, FGG, CAMKK1, KLHL32, NHEJ1, RPH3AL, SLC26A9, KIAA0319, DUOXA1, MYOM1, AR, EXTL1, ZNF444, OAT, BACE2, WNT4, SETD4, MCTP2, ANKRD45, PAIP2B, TRIM71, ATP8A1, ADCK1, PCSK1, KLHL8, SLC16A12, RET, ALPL, ABLIM2, HEPACAM2, CPT1B, GRIPAP1, MTUS2, SLC46A3, GPRC5C, TBC1D19, ASXL3, MEGF9, PNPLA7, TSPYL2, ZC3H7A, DISC1, IGFBP5, KLK14, ANKRD16, PHPT1, PHKA1, H…
					AKR1C2	WDFY4, ITPR1, NRXN3, HTR2C, TTC8, CPS1, MDM4, RORC, FGG, CAMKK1, KLHL32, NHEJ1, RPH3AL, SLC26A9, KIAA0319, DUOXA1, MYOM1, AR, EXTL1, ZNF444, OAT, BACE2, WNT4, SETD4, MCTP2, ANKRD45, PAIP2B, TRIM71, ATP8A1, ADCK1, PCSK1, KLHL8, SLC16A12, RET, ALPL, ABLIM2, HEPACAM2, CPT1B, GRIPAP1, MTUS2, SLC46A3, GPRC5C, TBC1D19, ASXL3, MEGF9, PNPLA7, TSPYL2, ZC3H7A, DISC1, IGFBP5, KLK14, ANKRD16, PHPT1, PHKA1, H…
					AKR1C3	WDFY4, ITPR1, NRXN3, HTR2C, TTC8, CPS1, MDM4, RORC, FGG, CAMKK1, KLHL32, NHEJ1, RPH3AL, SLC26A9, KIAA0319, DUOXA1, MYOM1, AR, EXTL1, ZNF444, OAT, BACE2, WNT4, SETD4, MCTP2, ANKRD45, PAIP2B, TRIM71, ATP8A1, ADCK1, PCSK1, KLHL8, SLC16A12, RET, ALPL, ABLIM2, HEPACAM2, CPT1B, GRIPAP1, MTUS2, SLC46A3, GPRC5C, TBC1D19, ASXL3, MEGF9, PNPLA7, TSPYL2, ZC3H7A, DISC1, IGFBP5, KLK14, ANKRD16, PHPT1, PHKA1, H…
					ADHFE1	WDFY4, ITPR1, NRXN3, HTR2C, TTC8, CPS1, MDM4, RORC, FGG, CAMKK1, KLHL32, NHEJ1, RPH3AL, SLC26A9, KIAA0319, DUOXA1, MYOM1, AR, EXTL1, ZNF444, OAT, BACE2, WNT4, SETD4, MCTP2, ANKRD45, PAIP2B, TRIM71, ATP8A1, ADCK1, PCSK1, KLHL8, SLC16A12, RET, ALPL, ABLIM2, HEPACAM2, CPT1B, GRIPAP1, MTUS2, SLC46A3, GPRC5C, TBC1D19, ASXL3, MEGF9, PNPLA7, TSPYL2, ZC3H7A, DISC1, IGFBP5, KLK14, ANKRD16, PHPT1, PHKA1, H…
					C8B	WDFY4, ITPR1, NRXN3, HTR2C, TTC8, CPS1, MDM4, RORC, FGG, CAMKK1, KLHL32, NHEJ1, RPH3AL, SLC26A9, KIAA0319, DUOXA1, MYOM1, AR, EXTL1, ZNF444, OAT, BACE2, WNT4, SETD4, MCTP2, ANKRD45, PAIP2B, TRIM71, ATP8A1, ADCK1, PCSK1, KLHL8, SLC16A12, RET, ALPL, ABLIM2, HEPACAM2, CPT1B, GRIPAP1, MTUS2, SLC46A3, GPRC5C, TBC1D19, ASXL3, MEGF9, PNPLA7, TSPYL2, ZC3H7A, DISC1, IGFBP5, KLK14, ANKRD16, PHPT1, PHKA1, H…
					NEO1	WDFY4, ITPR1, NRXN3, HTR2C, TTC8, CPS1, MDM4, RORC, FGG, CAMKK1, KLHL32, NHEJ1, RPH3AL, SLC26A9, KIAA0319, DUOXA1, MYOM1, AR, EXTL1, ZNF444, OAT, BACE2, WNT4, SETD4, MCTP2, ANKRD45, PAIP2B, TRIM71, ATP8A1, ADCK1, PCSK1, KLHL8, SLC16A12, RET, ALPL, ABLIM2, HEPACAM2, CPT1B, GRIPAP1, MTUS2, SLC46A3, GPRC5C, TBC1D19, ASXL3, MEGF9, PNPLA7, TSPYL2, ZC3H7A, DISC1, IGFBP5, KLK14, ANKRD16, PHPT1, PHKA1, H…
					CYP4A11	WDFY4, ITPR1, NRXN3, HTR2C, TTC8, CPS1, MDM4, RORC, FGG, CAMKK1, KLHL32, NHEJ1, RPH3AL, SLC26A9, KIAA0319, DUOXA1, MYOM1, AR, EXTL1, ZNF444, OAT, BACE2, WNT4, SETD4, MCTP2, ANKRD45, PAIP2B, TRIM71, ATP8A1, ADCK1, PCSK1, KLHL8, SLC16A12, RET, ALPL, ABLIM2, HEPACAM2, CPT1B, GRIPAP1, MTUS2, SLC46A3, GPRC5C, TBC1D19, ASXL3, MEGF9, PNPLA7, TSPYL2, ZC3H7A, DISC1, IGFBP5, KLK14, ANKRD16, PHPT1, PHKA1, H…
					HGD	WDFY4, ITPR1, NRXN3, HTR2C, TTC8, CPS1, MDM4, RORC, FGG, CAMKK1, KLHL32, NHEJ1, RPH3AL, SLC26A9, KIAA0319, DUOXA1, MYOM1, AR, EXTL1, ZNF444, OAT, BACE2, WNT4, SETD4, MCTP2, ANKRD45, PAIP2B, TRIM71, ATP8A1, ADCK1, PCSK1, KLHL8, SLC16A12, RET, ALPL, ABLIM2, HEPACAM2, CPT1B, GRIPAP1, MTUS2, SLC46A3, GPRC5C, TBC1D19, ASXL3, MEGF9, PNPLA7, TSPYL2, ZC3H7A, DISC1, IGFBP5, KLK14, ANKRD16, PHPT1, PHKA1, H…
					SPATA20	WDFY4, ITPR1, NRXN3, HTR2C, TTC8, CPS1, MDM4, RORC, FGG, CAMKK1, KLHL32, NHEJ1, RPH3AL, SLC26A9, KIAA0319, DUOXA1, MYOM1, AR, EXTL1, ZNF444, OAT, BACE2, WNT4, SETD4, MCTP2, ANKRD45, PAIP2B, TRIM71, ATP8A1, ADCK1, PCSK1, KLHL8, SLC16A12, RET, ALPL, ABLIM2, HEPACAM2, CPT1B, GRIPAP1, MTUS2, SLC46A3, GPRC5C, TBC1D19, ASXL3, MEGF9, PNPLA7, TSPYL2, ZC3H7A, DISC1, IGFBP5, KLK14, ANKRD16, PHPT1, PHKA1, H…
					HUNK	WDFY4, ITPR1, NRXN3, HTR2C, TTC8, CPS1, MDM4, RORC, FGG, CAMKK1, KLHL32, NHEJ1, RPH3AL, SLC26A9, KIAA0319, DUOXA1, MYOM1, AR, EXTL1, ZNF444, OAT, BACE2, WNT4, SETD4, MCTP2, ANKRD45, PAIP2B, TRIM71, ATP8A1, ADCK1, PCSK1, KLHL8, SLC16A12, RET, ALPL, ABLIM2, HEPACAM2, CPT1B, GRIPAP1, MTUS2, SLC46A3, GPRC5C, TBC1D19, ASXL3, MEGF9, PNPLA7, TSPYL2, ZC3H7A, DISC1, IGFBP5, KLK14, ANKRD16, PHPT1, PHKA1, H…
					LYPD6	WDFY4, ITPR1, NRXN3, HTR2C, TTC8, CPS1, MDM4, RORC, FGG, CAMKK1, KLHL32, NHEJ1, RPH3AL, SLC26A9, KIAA0319, DUOXA1, MYOM1, AR, EXTL1, ZNF444, OAT, BACE2, WNT4, SETD4, MCTP2, ANKRD45, PAIP2B, TRIM71, ATP8A1, ADCK1, PCSK1, KLHL8, SLC16A12, RET, ALPL, ABLIM2, HEPACAM2, CPT1B, GRIPAP1, MTUS2, SLC46A3, GPRC5C, TBC1D19, ASXL3, MEGF9, PNPLA7, TSPYL2, ZC3H7A, DISC1, IGFBP5, KLK14, ANKRD16, PHPT1, PHKA1, H…
					SLC24A3	WDFY4, ITPR1, NRXN3, HTR2C, TTC8, CPS1, MDM4, RORC, FGG, CAMKK1, KLHL32, NHEJ1, RPH3AL, SLC26A9, KIAA0319, DUOXA1, MYOM1, AR, EXTL1, ZNF444, OAT, BACE2, WNT4, SETD4, MCTP2, ANKRD45, PAIP2B, TRIM71, ATP8A1, ADCK1, PCSK1, KLHL8, SLC16A12, RET, ALPL, ABLIM2, HEPACAM2, CPT1B, GRIPAP1, MTUS2, SLC46A3, GPRC5C, TBC1D19, ASXL3, MEGF9, PNPLA7, TSPYL2, ZC3H7A, DISC1, IGFBP5, KLK14, ANKRD16, PHPT1, PHKA1, H…
					PCDHB3	WDFY4, ITPR1, NRXN3, HTR2C, TTC8, CPS1, MDM4, RORC, FGG, CAMKK1, KLHL32, NHEJ1, RPH3AL, SLC26A9, KIAA0319, DUOXA1, MYOM1, AR, EXTL1, ZNF444, OAT, BACE2, WNT4, SETD4, MCTP2, ANKRD45, PAIP2B, TRIM71, ATP8A1, ADCK1, PCSK1, KLHL8, SLC16A12, RET, ALPL, ABLIM2, HEPACAM2, CPT1B, GRIPAP1, MTUS2, SLC46A3, GPRC5C, TBC1D19, ASXL3, MEGF9, PNPLA7, TSPYL2, ZC3H7A, DISC1, IGFBP5, KLK14, ANKRD16, PHPT1, PHKA1, H…
					AQP6	WDFY4, ITPR1, NRXN3, HTR2C, TTC8, CPS1, MDM4, RORC, FGG, CAMKK1, KLHL32, NHEJ1, RPH3AL, SLC26A9, KIAA0319, DUOXA1, MYOM1, AR, EXTL1, ZNF444, OAT, BACE2, WNT4, SETD4, MCTP2, ANKRD45, PAIP2B, TRIM71, ATP8A1, ADCK1, PCSK1, KLHL8, SLC16A12, RET, ALPL, ABLIM2, HEPACAM2, CPT1B, GRIPAP1, MTUS2, SLC46A3, GPRC5C, TBC1D19, ASXL3, MEGF9, PNPLA7, TSPYL2, ZC3H7A, DISC1, IGFBP5, KLK14, ANKRD16, PHPT1, PHKA1, H…
					CACNA2D2	WDFY4, ITPR1, NRXN3, HTR2C, TTC8, CPS1, MDM4, RORC, FGG, CAMKK1, KLHL32, NHEJ1, RPH3AL, SLC26A9, KIAA0319, DUOXA1, MYOM1, AR, EXTL1, ZNF444, OAT, BACE2, WNT4, SETD4, MCTP2, ANKRD45, PAIP2B, TRIM71, ATP8A1, ADCK1, PCSK1, KLHL8, SLC16A12, RET, ALPL, ABLIM2, HEPACAM2, CPT1B, GRIPAP1, MTUS2, SLC46A3, GPRC5C, TBC1D19, ASXL3, MEGF9, PNPLA7, TSPYL2, ZC3H7A, DISC1, IGFBP5, KLK14, ANKRD16, PHPT1, PHKA1, H…
					TMEM150C	WDFY4, ITPR1, NRXN3, HTR2C, TTC8, CPS1, MDM4, RORC, FGG, CAMKK1, KLHL32, NHEJ1, RPH3AL, SLC26A9, KIAA0319, DUOXA1, MYOM1, AR, EXTL1, ZNF444, OAT, BACE2, WNT4, SETD4, MCTP2, ANKRD45, PAIP2B, TRIM71, ATP8A1, ADCK1, PCSK1, KLHL8, SLC16A12, RET, ALPL, ABLIM2, HEPACAM2, CPT1B, GRIPAP1, MTUS2, SLC46A3, GPRC5C, TBC1D19, ASXL3, MEGF9, PNPLA7, TSPYL2, ZC3H7A, DISC1, IGFBP5, KLK14, ANKRD16, PHPT1, PHKA1, H…
					STAC2	WDFY4, ITPR1, NRXN3, HTR2C, TTC8, CPS1, MDM4, RORC, FGG, CAMKK1, KLHL32, NHEJ1, RPH3AL, SLC26A9, KIAA0319, DUOXA1, MYOM1, AR, EXTL1, ZNF444, OAT, BACE2, WNT4, SETD4, MCTP2, ANKRD45, PAIP2B, TRIM71, ATP8A1, ADCK1, PCSK1, KLHL8, SLC16A12, RET, ALPL, ABLIM2, HEPACAM2, CPT1B, GRIPAP1, MTUS2, SLC46A3, GPRC5C, TBC1D19, ASXL3, MEGF9, PNPLA7, TSPYL2, ZC3H7A, DISC1, IGFBP5, KLK14, ANKRD16, PHPT1, PHKA1, H…
					LRRC56	WDFY4, ITPR1, NRXN3, HTR2C, TTC8, CPS1, MDM4, RORC, FGG, CAMKK1, KLHL32, NHEJ1, RPH3AL, SLC26A9, KIAA0319, DUOXA1, MYOM1, AR, EXTL1, ZNF444, OAT, BACE2, WNT4, SETD4, MCTP2, ANKRD45, PAIP2B, TRIM71, ATP8A1, ADCK1, PCSK1, KLHL8, SLC16A12, RET, ALPL, ABLIM2, HEPACAM2, CPT1B, GRIPAP1, MTUS2, SLC46A3, GPRC5C, TBC1D19, ASXL3, MEGF9, PNPLA7, TSPYL2, ZC3H7A, DISC1, IGFBP5, KLK14, ANKRD16, PHPT1, PHKA1, H…
					SHANK2	WDFY4, ITPR1, NRXN3, HTR2C, TTC8, CPS1, MDM4, RORC, FGG, CAMKK1, KLHL32, NHEJ1, RPH3AL, SLC26A9, KIAA0319, DUOXA1, MYOM1, AR, EXTL1, ZNF444, OAT, BACE2, WNT4, SETD4, MCTP2, ANKRD45, PAIP2B, TRIM71, ATP8A1, ADCK1, PCSK1, KLHL8, SLC16A12, RET, ALPL, ABLIM2, HEPACAM2, CPT1B, GRIPAP1, MTUS2, SLC46A3, GPRC5C, TBC1D19, ASXL3, MEGF9, PNPLA7, TSPYL2, ZC3H7A, DISC1, IGFBP5, KLK14, ANKRD16, PHPT1, PHKA1, H…
					ELAVL4	WDFY4, ITPR1, NRXN3, HTR2C, TTC8, CPS1, MDM4, RORC, FGG, CAMKK1, KLHL32, NHEJ1, RPH3AL, SLC26A9, KIAA0319, DUOXA1, MYOM1, AR, EXTL1, ZNF444, OAT, BACE2, WNT4, SETD4, MCTP2, ANKRD45, PAIP2B, TRIM71, ATP8A1, ADCK1, PCSK1, KLHL8, SLC16A12, RET, ALPL, ABLIM2, HEPACAM2, CPT1B, GRIPAP1, MTUS2, SLC46A3, GPRC5C, TBC1D19, ASXL3, MEGF9, PNPLA7, TSPYL2, ZC3H7A, DISC1, IGFBP5, KLK14, ANKRD16, PHPT1, PHKA1, H…
					OSBPL1A	WDFY4, ITPR1, NRXN3, HTR2C, TTC8, CPS1, MDM4, RORC, FGG, CAMKK1, KLHL32, NHEJ1, RPH3AL, SLC26A9, KIAA0319, DUOXA1, MYOM1, AR, EXTL1, ZNF444, OAT, BACE2, WNT4, SETD4, MCTP2, ANKRD45, PAIP2B, TRIM71, ATP8A1, ADCK1, PCSK1, KLHL8, SLC16A12, RET, ALPL, ABLIM2, HEPACAM2, CPT1B, GRIPAP1, MTUS2, SLC46A3, GPRC5C, TBC1D19, ASXL3, MEGF9, PNPLA7, TSPYL2, ZC3H7A, DISC1, IGFBP5, KLK14, ANKRD16, PHPT1, PHKA1, H…
					RFX6	WDFY4, ITPR1, NRXN3, HTR2C, TTC8, CPS1, MDM4, RORC, FGG, CAMKK1, KLHL32, NHEJ1, RPH3AL, SLC26A9, KIAA0319, DUOXA1, MYOM1, AR, EXTL1, ZNF444, OAT, BACE2, WNT4, SETD4, MCTP2, ANKRD45, PAIP2B, TRIM71, ATP8A1, ADCK1, PCSK1, KLHL8, SLC16A12, RET, ALPL, ABLIM2, HEPACAM2, CPT1B, GRIPAP1, MTUS2, SLC46A3, GPRC5C, TBC1D19, ASXL3, MEGF9, PNPLA7, TSPYL2, ZC3H7A, DISC1, IGFBP5, KLK14, ANKRD16, PHPT1, PHKA1, H…
					OVOL2	WDFY4, ITPR1, NRXN3, HTR2C, TTC8, CPS1, MDM4, RORC, FGG, CAMKK1, KLHL32, NHEJ1, RPH3AL, SLC26A9, KIAA0319, DUOXA1, MYOM1, AR, EXTL1, ZNF444, OAT, BACE2, WNT4, SETD4, MCTP2, ANKRD45, PAIP2B, TRIM71, ATP8A1, ADCK1, PCSK1, KLHL8, SLC16A12, RET, ALPL, ABLIM2, HEPACAM2, CPT1B, GRIPAP1, MTUS2, SLC46A3, GPRC5C, TBC1D19, ASXL3, MEGF9, PNPLA7, TSPYL2, ZC3H7A, DISC1, IGFBP5, KLK14, ANKRD16, PHPT1, PHKA1, H…
					TBXAS1	WDFY4, ITPR1, NRXN3, HTR2C, TTC8, CPS1, MDM4, RORC, FGG, CAMKK1, KLHL32, NHEJ1, RPH3AL, SLC26A9, KIAA0319, DUOXA1, MYOM1, AR, EXTL1, ZNF444, OAT, BACE2, WNT4, SETD4, MCTP2, ANKRD45, PAIP2B, TRIM71, ATP8A1, ADCK1, PCSK1, KLHL8, SLC16A12, RET, ALPL, ABLIM2, HEPACAM2, CPT1B, GRIPAP1, MTUS2, SLC46A3, GPRC5C, TBC1D19, ASXL3, MEGF9, PNPLA7, TSPYL2, ZC3H7A, DISC1, IGFBP5, KLK14, ANKRD16, PHPT1, PHKA1, H…
					IYD	WDFY4, ITPR1, NRXN3, HTR2C, TTC8, CPS1, MDM4, RORC, FGG, CAMKK1, KLHL32, NHEJ1, RPH3AL, SLC26A9, KIAA0319, DUOXA1, MYOM1, AR, EXTL1, ZNF444, OAT, BACE2, WNT4, SETD4, MCTP2, ANKRD45, PAIP2B, TRIM71, ATP8A1, ADCK1, PCSK1, KLHL8, SLC16A12, RET, ALPL, ABLIM2, HEPACAM2, CPT1B, GRIPAP1, MTUS2, SLC46A3, GPRC5C, TBC1D19, ASXL3, MEGF9, PNPLA7, TSPYL2, ZC3H7A, DISC1, IGFBP5, KLK14, ANKRD16, PHPT1, PHKA1, H…
					LYPD1	WDFY4, ITPR1, NRXN3, HTR2C, TTC8, CPS1, MDM4, RORC, FGG, CAMKK1, KLHL32, NHEJ1, RPH3AL, SLC26A9, KIAA0319, DUOXA1, MYOM1, AR, EXTL1, ZNF444, OAT, BACE2, WNT4, SETD4, MCTP2, ANKRD45, PAIP2B, TRIM71, ATP8A1, ADCK1, PCSK1, KLHL8, SLC16A12, RET, ALPL, ABLIM2, HEPACAM2, CPT1B, GRIPAP1, MTUS2, SLC46A3, GPRC5C, TBC1D19, ASXL3, MEGF9, PNPLA7, TSPYL2, ZC3H7A, DISC1, IGFBP5, KLK14, ANKRD16, PHPT1, PHKA1, H…
					RBPMS2	WDFY4, ITPR1, NRXN3, HTR2C, TTC8, CPS1, MDM4, RORC, FGG, CAMKK1, KLHL32, NHEJ1, RPH3AL, SLC26A9, KIAA0319, DUOXA1, MYOM1, AR, EXTL1, ZNF444, OAT, BACE2, WNT4, SETD4, MCTP2, ANKRD45, PAIP2B, TRIM71, ATP8A1, ADCK1, PCSK1, KLHL8, SLC16A12, RET, ALPL, ABLIM2, HEPACAM2, CPT1B, GRIPAP1, MTUS2, SLC46A3, GPRC5C, TBC1D19, ASXL3, MEGF9, PNPLA7, TSPYL2, ZC3H7A, DISC1, IGFBP5, KLK14, ANKRD16, PHPT1, PHKA1, H…
					NEB	WDFY4, ITPR1, NRXN3, HTR2C, TTC8, CPS1, MDM4, RORC, FGG, CAMKK1, KLHL32, NHEJ1, RPH3AL, SLC26A9, KIAA0319, DUOXA1, MYOM1, AR, EXTL1, ZNF444, OAT, BACE2, WNT4, SETD4, MCTP2, ANKRD45, PAIP2B, TRIM71, ATP8A1, ADCK1, PCSK1, KLHL8, SLC16A12, RET, ALPL, ABLIM2, HEPACAM2, CPT1B, GRIPAP1, MTUS2, SLC46A3, GPRC5C, TBC1D19, ASXL3, MEGF9, PNPLA7, TSPYL2, ZC3H7A, DISC1, IGFBP5, KLK14, ANKRD16, PHPT1, PHKA1, H…
					ANG	WDFY4, ITPR1, NRXN3, HTR2C, TTC8, CPS1, MDM4, RORC, FGG, CAMKK1, KLHL32, NHEJ1, RPH3AL, SLC26A9, KIAA0319, DUOXA1, MYOM1, AR, EXTL1, ZNF444, OAT, BACE2, WNT4, SETD4, MCTP2, ANKRD45, PAIP2B, TRIM71, ATP8A1, ADCK1, PCSK1, KLHL8, SLC16A12, RET, ALPL, ABLIM2, HEPACAM2, CPT1B, GRIPAP1, MTUS2, SLC46A3, GPRC5C, TBC1D19, ASXL3, MEGF9, PNPLA7, TSPYL2, ZC3H7A, DISC1, IGFBP5, KLK14, ANKRD16, PHPT1, PHKA1, H…
					KIAA1324	WDFY4, ITPR1, NRXN3, HTR2C, TTC8, CPS1, MDM4, RORC, FGG, CAMKK1, KLHL32, NHEJ1, RPH3AL, SLC26A9, KIAA0319, DUOXA1, MYOM1, AR, EXTL1, ZNF444, OAT, BACE2, WNT4, SETD4, MCTP2, ANKRD45, PAIP2B, TRIM71, ATP8A1, ADCK1, PCSK1, KLHL8, SLC16A12, RET, ALPL, ABLIM2, HEPACAM2, CPT1B, GRIPAP1, MTUS2, SLC46A3, GPRC5C, TBC1D19, ASXL3, MEGF9, PNPLA7, TSPYL2, ZC3H7A, DISC1, IGFBP5, KLK14, ANKRD16, PHPT1, PHKA1, H…
					NBEA	WDFY4, ITPR1, NRXN3, HTR2C, TTC8, CPS1, MDM4, RORC, FGG, CAMKK1, KLHL32, NHEJ1, RPH3AL, SLC26A9, KIAA0319, DUOXA1, MYOM1, AR, EXTL1, ZNF444, OAT, BACE2, WNT4, SETD4, MCTP2, ANKRD45, PAIP2B, TRIM71, ATP8A1, ADCK1, PCSK1, KLHL8, SLC16A12, RET, ALPL, ABLIM2, HEPACAM2, CPT1B, GRIPAP1, MTUS2, SLC46A3, GPRC5C, TBC1D19, ASXL3, MEGF9, PNPLA7, TSPYL2, ZC3H7A, DISC1, IGFBP5, KLK14, ANKRD16, PHPT1, PHKA1, H…
					RANGRF	WDFY4, ITPR1, NRXN3, HTR2C, TTC8, CPS1, MDM4, RORC, FGG, CAMKK1, KLHL32, NHEJ1, RPH3AL, SLC26A9, KIAA0319, DUOXA1, MYOM1, AR, EXTL1, ZNF444, OAT, BACE2, WNT4, SETD4, MCTP2, ANKRD45, PAIP2B, TRIM71, ATP8A1, ADCK1, PCSK1, KLHL8, SLC16A12, RET, ALPL, ABLIM2, HEPACAM2, CPT1B, GRIPAP1, MTUS2, SLC46A3, GPRC5C, TBC1D19, ASXL3, MEGF9, PNPLA7, TSPYL2, ZC3H7A, DISC1, IGFBP5, KLK14, ANKRD16, PHPT1, PHKA1, H…
					NPW	WDFY4, ITPR1, NRXN3, HTR2C, TTC8, CPS1, MDM4, RORC, FGG, CAMKK1, KLHL32, NHEJ1, RPH3AL, SLC26A9, KIAA0319, DUOXA1, MYOM1, AR, EXTL1, ZNF444, OAT, BACE2, WNT4, SETD4, MCTP2, ANKRD45, PAIP2B, TRIM71, ATP8A1, ADCK1, PCSK1, KLHL8, SLC16A12, RET, ALPL, ABLIM2, HEPACAM2, CPT1B, GRIPAP1, MTUS2, SLC46A3, GPRC5C, TBC1D19, ASXL3, MEGF9, PNPLA7, TSPYL2, ZC3H7A, DISC1, IGFBP5, KLK14, ANKRD16, PHPT1, PHKA1, H…
					SEC61A2	WDFY4, ITPR1, NRXN3, HTR2C, TTC8, CPS1, MDM4, RORC, FGG, CAMKK1, KLHL32, NHEJ1, RPH3AL, SLC26A9, KIAA0319, DUOXA1, MYOM1, AR, EXTL1, ZNF444, OAT, BACE2, WNT4, SETD4, MCTP2, ANKRD45, PAIP2B, TRIM71, ATP8A1, ADCK1, PCSK1, KLHL8, SLC16A12, RET, ALPL, ABLIM2, HEPACAM2, CPT1B, GRIPAP1, MTUS2, SLC46A3, GPRC5C, TBC1D19, ASXL3, MEGF9, PNPLA7, TSPYL2, ZC3H7A, DISC1, IGFBP5, KLK14, ANKRD16, PHPT1, PHKA1, H…
					CRIP3	WDFY4, ITPR1, NRXN3, HTR2C, TTC8, CPS1, MDM4, RORC, FGG, CAMKK1, KLHL32, NHEJ1, RPH3AL, SLC26A9, KIAA0319, DUOXA1, MYOM1, AR, EXTL1, ZNF444, OAT, BACE2, WNT4, SETD4, MCTP2, ANKRD45, PAIP2B, TRIM71, ATP8A1, ADCK1, PCSK1, KLHL8, SLC16A12, RET, ALPL, ABLIM2, HEPACAM2, CPT1B, GRIPAP1, MTUS2, SLC46A3, GPRC5C, TBC1D19, ASXL3, MEGF9, PNPLA7, TSPYL2, ZC3H7A, DISC1, IGFBP5, KLK14, ANKRD16, PHPT1, PHKA1, H…
					KCNMB4	WDFY4, ITPR1, NRXN3, HTR2C, TTC8, CPS1, MDM4, RORC, FGG, CAMKK1, KLHL32, NHEJ1, RPH3AL, SLC26A9, KIAA0319, DUOXA1, MYOM1, AR, EXTL1, ZNF444, OAT, BACE2, WNT4, SETD4, MCTP2, ANKRD45, PAIP2B, TRIM71, ATP8A1, ADCK1, PCSK1, KLHL8, SLC16A12, RET, ALPL, ABLIM2, HEPACAM2, CPT1B, GRIPAP1, MTUS2, SLC46A3, GPRC5C, TBC1D19, ASXL3, MEGF9, PNPLA7, TSPYL2, ZC3H7A, DISC1, IGFBP5, KLK14, ANKRD16, PHPT1, PHKA1, H…
					EPHA7	WDFY4, ITPR1, NRXN3, HTR2C, TTC8, CPS1, MDM4, RORC, FGG, CAMKK1, KLHL32, NHEJ1, RPH3AL, SLC26A9, KIAA0319, DUOXA1, MYOM1, AR, EXTL1, ZNF444, OAT, BACE2, WNT4, SETD4, MCTP2, ANKRD45, PAIP2B, TRIM71, ATP8A1, ADCK1, PCSK1, KLHL8, SLC16A12, RET, ALPL, ABLIM2, HEPACAM2, CPT1B, GRIPAP1, MTUS2, SLC46A3, GPRC5C, TBC1D19, ASXL3, MEGF9, PNPLA7, TSPYL2, ZC3H7A, DISC1, IGFBP5, KLK14, ANKRD16, PHPT1, PHKA1, H…
					NCKAP5	WDFY4, ITPR1, NRXN3, HTR2C, TTC8, CPS1, MDM4, RORC, FGG, CAMKK1, KLHL32, NHEJ1, RPH3AL, SLC26A9, KIAA0319, DUOXA1, MYOM1, AR, EXTL1, ZNF444, OAT, BACE2, WNT4, SETD4, MCTP2, ANKRD45, PAIP2B, TRIM71, ATP8A1, ADCK1, PCSK1, KLHL8, SLC16A12, RET, ALPL, ABLIM2, HEPACAM2, CPT1B, GRIPAP1, MTUS2, SLC46A3, GPRC5C, TBC1D19, ASXL3, MEGF9, PNPLA7, TSPYL2, ZC3H7A, DISC1, IGFBP5, KLK14, ANKRD16, PHPT1, PHKA1, H…
					CXXC4	WDFY4, ITPR1, NRXN3, HTR2C, TTC8, CPS1, MDM4, RORC, FGG, CAMKK1, KLHL32, NHEJ1, RPH3AL, SLC26A9, KIAA0319, DUOXA1, MYOM1, AR, EXTL1, ZNF444, OAT, BACE2, WNT4, SETD4, MCTP2, ANKRD45, PAIP2B, TRIM71, ATP8A1, ADCK1, PCSK1, KLHL8, SLC16A12, RET, ALPL, ABLIM2, HEPACAM2, CPT1B, GRIPAP1, MTUS2, SLC46A3, GPRC5C, TBC1D19, ASXL3, MEGF9, PNPLA7, TSPYL2, ZC3H7A, DISC1, IGFBP5, KLK14, ANKRD16, PHPT1, PHKA1, H…
					ENAM	WDFY4, ITPR1, NRXN3, HTR2C, TTC8, CPS1, MDM4, RORC, FGG, CAMKK1, KLHL32, NHEJ1, RPH3AL, SLC26A9, KIAA0319, DUOXA1, MYOM1, AR, EXTL1, ZNF444, OAT, BACE2, WNT4, SETD4, MCTP2, ANKRD45, PAIP2B, TRIM71, ATP8A1, ADCK1, PCSK1, KLHL8, SLC16A12, RET, ALPL, ABLIM2, HEPACAM2, CPT1B, GRIPAP1, MTUS2, SLC46A3, GPRC5C, TBC1D19, ASXL3, MEGF9, PNPLA7, TSPYL2, ZC3H7A, DISC1, IGFBP5, KLK14, ANKRD16, PHPT1, PHKA1, H…
					ZBTB16	WDFY4, ITPR1, NRXN3, HTR2C, TTC8, CPS1, MDM4, RORC, FGG, CAMKK1, KLHL32, NHEJ1, RPH3AL, SLC26A9, KIAA0319, DUOXA1, MYOM1, AR, EXTL1, ZNF444, OAT, BACE2, WNT4, SETD4, MCTP2, ANKRD45, PAIP2B, TRIM71, ATP8A1, ADCK1, PCSK1, KLHL8, SLC16A12, RET, ALPL, ABLIM2, HEPACAM2, CPT1B, GRIPAP1, MTUS2, SLC46A3, GPRC5C, TBC1D19, ASXL3, MEGF9, PNPLA7, TSPYL2, ZC3H7A, DISC1, IGFBP5, KLK14, ANKRD16, PHPT1, PHKA1, H…
					TBX15	WDFY4, ITPR1, NRXN3, HTR2C, TTC8, CPS1, MDM4, RORC, FGG, CAMKK1, KLHL32, NHEJ1, RPH3AL, SLC26A9, KIAA0319, DUOXA1, MYOM1, AR, EXTL1, ZNF444, OAT, BACE2, WNT4, SETD4, MCTP2, ANKRD45, PAIP2B, TRIM71, ATP8A1, ADCK1, PCSK1, KLHL8, SLC16A12, RET, ALPL, ABLIM2, HEPACAM2, CPT1B, GRIPAP1, MTUS2, SLC46A3, GPRC5C, TBC1D19, ASXL3, MEGF9, PNPLA7, TSPYL2, ZC3H7A, DISC1, IGFBP5, KLK14, ANKRD16, PHPT1, PHKA1, H…
					GP2	WDFY4, ITPR1, NRXN3, HTR2C, TTC8, CPS1, MDM4, RORC, FGG, CAMKK1, KLHL32, NHEJ1, RPH3AL, SLC26A9, KIAA0319, DUOXA1, MYOM1, AR, EXTL1, ZNF444, OAT, BACE2, WNT4, SETD4, MCTP2, ANKRD45, PAIP2B, TRIM71, ATP8A1, ADCK1, PCSK1, KLHL8, SLC16A12, RET, ALPL, ABLIM2, HEPACAM2, CPT1B, GRIPAP1, MTUS2, SLC46A3, GPRC5C, TBC1D19, ASXL3, MEGF9, PNPLA7, TSPYL2, ZC3H7A, DISC1, IGFBP5, KLK14, ANKRD16, PHPT1, PHKA1, H…
					ADAMTSL3	WDFY4, ITPR1, NRXN3, HTR2C, TTC8, CPS1, MDM4, RORC, FGG, CAMKK1, KLHL32, NHEJ1, RPH3AL, SLC26A9, KIAA0319, DUOXA1, MYOM1, AR, EXTL1, ZNF444, OAT, BACE2, WNT4, SETD4, MCTP2, ANKRD45, PAIP2B, TRIM71, ATP8A1, ADCK1, PCSK1, KLHL8, SLC16A12, RET, ALPL, ABLIM2, HEPACAM2, CPT1B, GRIPAP1, MTUS2, SLC46A3, GPRC5C, TBC1D19, ASXL3, MEGF9, PNPLA7, TSPYL2, ZC3H7A, DISC1, IGFBP5, KLK14, ANKRD16, PHPT1, PHKA1, H…
					SLC38A11	WDFY4, ITPR1, NRXN3, HTR2C, TTC8, CPS1, MDM4, RORC, FGG, CAMKK1, KLHL32, NHEJ1, RPH3AL, SLC26A9, KIAA0319, DUOXA1, MYOM1, AR, EXTL1, ZNF444, OAT, BACE2, WNT4, SETD4, MCTP2, ANKRD45, PAIP2B, TRIM71, ATP8A1, ADCK1, PCSK1, KLHL8, SLC16A12, RET, ALPL, ABLIM2, HEPACAM2, CPT1B, GRIPAP1, MTUS2, SLC46A3, GPRC5C, TBC1D19, ASXL3, MEGF9, PNPLA7, TSPYL2, ZC3H7A, DISC1, IGFBP5, KLK14, ANKRD16, PHPT1, PHKA1, H…
					NAPB	WDFY4, ITPR1, NRXN3, HTR2C, TTC8, CPS1, MDM4, RORC, FGG, CAMKK1, KLHL32, NHEJ1, RPH3AL, SLC26A9, KIAA0319, DUOXA1, MYOM1, AR, EXTL1, ZNF444, OAT, BACE2, WNT4, SETD4, MCTP2, ANKRD45, PAIP2B, TRIM71, ATP8A1, ADCK1, PCSK1, KLHL8, SLC16A12, RET, ALPL, ABLIM2, HEPACAM2, CPT1B, GRIPAP1, MTUS2, SLC46A3, GPRC5C, TBC1D19, ASXL3, MEGF9, PNPLA7, TSPYL2, ZC3H7A, DISC1, IGFBP5, KLK14, ANKRD16, PHPT1, PHKA1, H…
					KCNK3	WDFY4, ITPR1, NRXN3, HTR2C, TTC8, CPS1, MDM4, RORC, FGG, CAMKK1, KLHL32, NHEJ1, RPH3AL, SLC26A9, KIAA0319, DUOXA1, MYOM1, AR, EXTL1, ZNF444, OAT, BACE2, WNT4, SETD4, MCTP2, ANKRD45, PAIP2B, TRIM71, ATP8A1, ADCK1, PCSK1, KLHL8, SLC16A12, RET, ALPL, ABLIM2, HEPACAM2, CPT1B, GRIPAP1, MTUS2, SLC46A3, GPRC5C, TBC1D19, ASXL3, MEGF9, PNPLA7, TSPYL2, ZC3H7A, DISC1, IGFBP5, KLK14, ANKRD16, PHPT1, PHKA1, H…
					TRPM6	WDFY4, ITPR1, NRXN3, HTR2C, TTC8, CPS1, MDM4, RORC, FGG, CAMKK1, KLHL32, NHEJ1, RPH3AL, SLC26A9, KIAA0319, DUOXA1, MYOM1, AR, EXTL1, ZNF444, OAT, BACE2, WNT4, SETD4, MCTP2, ANKRD45, PAIP2B, TRIM71, ATP8A1, ADCK1, PCSK1, KLHL8, SLC16A12, RET, ALPL, ABLIM2, HEPACAM2, CPT1B, GRIPAP1, MTUS2, SLC46A3, GPRC5C, TBC1D19, ASXL3, MEGF9, PNPLA7, TSPYL2, ZC3H7A, DISC1, IGFBP5, KLK14, ANKRD16, PHPT1, PHKA1, H…
					SCNN1G	WDFY4, ITPR1, NRXN3, HTR2C, TTC8, CPS1, MDM4, RORC, FGG, CAMKK1, KLHL32, NHEJ1, RPH3AL, SLC26A9, KIAA0319, DUOXA1, MYOM1, AR, EXTL1, ZNF444, OAT, BACE2, WNT4, SETD4, MCTP2, ANKRD45, PAIP2B, TRIM71, ATP8A1, ADCK1, PCSK1, KLHL8, SLC16A12, RET, ALPL, ABLIM2, HEPACAM2, CPT1B, GRIPAP1, MTUS2, SLC46A3, GPRC5C, TBC1D19, ASXL3, MEGF9, PNPLA7, TSPYL2, ZC3H7A, DISC1, IGFBP5, KLK14, ANKRD16, PHPT1, PHKA1, H…
					FOXN4	WDFY4, ITPR1, NRXN3, HTR2C, TTC8, CPS1, MDM4, RORC, FGG, CAMKK1, KLHL32, NHEJ1, RPH3AL, SLC26A9, KIAA0319, DUOXA1, MYOM1, AR, EXTL1, ZNF444, OAT, BACE2, WNT4, SETD4, MCTP2, ANKRD45, PAIP2B, TRIM71, ATP8A1, ADCK1, PCSK1, KLHL8, SLC16A12, RET, ALPL, ABLIM2, HEPACAM2, CPT1B, GRIPAP1, MTUS2, SLC46A3, GPRC5C, TBC1D19, ASXL3, MEGF9, PNPLA7, TSPYL2, ZC3H7A, DISC1, IGFBP5, KLK14, ANKRD16, PHPT1, PHKA1, H…
					OVGP1	WDFY4, ITPR1, NRXN3, HTR2C, TTC8, CPS1, MDM4, RORC, FGG, CAMKK1, KLHL32, NHEJ1, RPH3AL, SLC26A9, KIAA0319, DUOXA1, MYOM1, AR, EXTL1, ZNF444, OAT, BACE2, WNT4, SETD4, MCTP2, ANKRD45, PAIP2B, TRIM71, ATP8A1, ADCK1, PCSK1, KLHL8, SLC16A12, RET, ALPL, ABLIM2, HEPACAM2, CPT1B, GRIPAP1, MTUS2, SLC46A3, GPRC5C, TBC1D19, ASXL3, MEGF9, PNPLA7, TSPYL2, ZC3H7A, DISC1, IGFBP5, KLK14, ANKRD16, PHPT1, PHKA1, H…
					COL25A1	WDFY4, ITPR1, NRXN3, HTR2C, TTC8, CPS1, MDM4, RORC, FGG, CAMKK1, KLHL32, NHEJ1, RPH3AL, SLC26A9, KIAA0319, DUOXA1, MYOM1, AR, EXTL1, ZNF444, OAT, BACE2, WNT4, SETD4, MCTP2, ANKRD45, PAIP2B, TRIM71, ATP8A1, ADCK1, PCSK1, KLHL8, SLC16A12, RET, ALPL, ABLIM2, HEPACAM2, CPT1B, GRIPAP1, MTUS2, SLC46A3, GPRC5C, TBC1D19, ASXL3, MEGF9, PNPLA7, TSPYL2, ZC3H7A, DISC1, IGFBP5, KLK14, ANKRD16, PHPT1, PHKA1, H…
					RAB26	WDFY4, ITPR1, NRXN3, HTR2C, TTC8, CPS1, MDM4, RORC, FGG, CAMKK1, KLHL32, NHEJ1, RPH3AL, SLC26A9, KIAA0319, DUOXA1, MYOM1, AR, EXTL1, ZNF444, OAT, BACE2, WNT4, SETD4, MCTP2, ANKRD45, PAIP2B, TRIM71, ATP8A1, ADCK1, PCSK1, KLHL8, SLC16A12, RET, ALPL, ABLIM2, HEPACAM2, CPT1B, GRIPAP1, MTUS2, SLC46A3, GPRC5C, TBC1D19, ASXL3, MEGF9, PNPLA7, TSPYL2, ZC3H7A, DISC1, IGFBP5, KLK14, ANKRD16, PHPT1, PHKA1, H…
					SCGB3A2	WDFY4, ITPR1, NRXN3, HTR2C, TTC8, CPS1, MDM4, RORC, FGG, CAMKK1, KLHL32, NHEJ1, RPH3AL, SLC26A9, KIAA0319, DUOXA1, MYOM1, AR, EXTL1, ZNF444, OAT, BACE2, WNT4, SETD4, MCTP2, ANKRD45, PAIP2B, TRIM71, ATP8A1, ADCK1, PCSK1, KLHL8, SLC16A12, RET, ALPL, ABLIM2, HEPACAM2, CPT1B, GRIPAP1, MTUS2, SLC46A3, GPRC5C, TBC1D19, ASXL3, MEGF9, PNPLA7, TSPYL2, ZC3H7A, DISC1, IGFBP5, KLK14, ANKRD16, PHPT1, PHKA1, H…
					RNASE4	WDFY4, ITPR1, NRXN3, HTR2C, TTC8, CPS1, MDM4, RORC, FGG, CAMKK1, KLHL32, NHEJ1, RPH3AL, SLC26A9, KIAA0319, DUOXA1, MYOM1, AR, EXTL1, ZNF444, OAT, BACE2, WNT4, SETD4, MCTP2, ANKRD45, PAIP2B, TRIM71, ATP8A1, ADCK1, PCSK1, KLHL8, SLC16A12, RET, ALPL, ABLIM2, HEPACAM2, CPT1B, GRIPAP1, MTUS2, SLC46A3, GPRC5C, TBC1D19, ASXL3, MEGF9, PNPLA7, TSPYL2, ZC3H7A, DISC1, IGFBP5, KLK14, ANKRD16, PHPT1, PHKA1, H…
					MYH7B	WDFY4, ITPR1, NRXN3, HTR2C, TTC8, CPS1, MDM4, RORC, FGG, CAMKK1, KLHL32, NHEJ1, RPH3AL, SLC26A9, KIAA0319, DUOXA1, MYOM1, AR, EXTL1, ZNF444, OAT, BACE2, WNT4, SETD4, MCTP2, ANKRD45, PAIP2B, TRIM71, ATP8A1, ADCK1, PCSK1, KLHL8, SLC16A12, RET, ALPL, ABLIM2, HEPACAM2, CPT1B, GRIPAP1, MTUS2, SLC46A3, GPRC5C, TBC1D19, ASXL3, MEGF9, PNPLA7, TSPYL2, ZC3H7A, DISC1, IGFBP5, KLK14, ANKRD16, PHPT1, PHKA1, H…
					SLC14A2	WDFY4, ITPR1, NRXN3, HTR2C, TTC8, CPS1, MDM4, RORC, FGG, CAMKK1, KLHL32, NHEJ1, RPH3AL, SLC26A9, KIAA0319, DUOXA1, MYOM1, AR, EXTL1, ZNF444, OAT, BACE2, WNT4, SETD4, MCTP2, ANKRD45, PAIP2B, TRIM71, ATP8A1, ADCK1, PCSK1, KLHL8, SLC16A12, RET, ALPL, ABLIM2, HEPACAM2, CPT1B, GRIPAP1, MTUS2, SLC46A3, GPRC5C, TBC1D19, ASXL3, MEGF9, PNPLA7, TSPYL2, ZC3H7A, DISC1, IGFBP5, KLK14, ANKRD16, PHPT1, PHKA1, H…
					CAPS2	WDFY4, ITPR1, NRXN3, HTR2C, TTC8, CPS1, MDM4, RORC, FGG, CAMKK1, KLHL32, NHEJ1, RPH3AL, SLC26A9, KIAA0319, DUOXA1, MYOM1, AR, EXTL1, ZNF444, OAT, BACE2, WNT4, SETD4, MCTP2, ANKRD45, PAIP2B, TRIM71, ATP8A1, ADCK1, PCSK1, KLHL8, SLC16A12, RET, ALPL, ABLIM2, HEPACAM2, CPT1B, GRIPAP1, MTUS2, SLC46A3, GPRC5C, TBC1D19, ASXL3, MEGF9, PNPLA7, TSPYL2, ZC3H7A, DISC1, IGFBP5, KLK14, ANKRD16, PHPT1, PHKA1, H…
					C20orf96	WDFY4, ITPR1, NRXN3, HTR2C, TTC8, CPS1, MDM4, RORC, FGG, CAMKK1, KLHL32, NHEJ1, RPH3AL, SLC26A9, KIAA0319, DUOXA1, MYOM1, AR, EXTL1, ZNF444, OAT, BACE2, WNT4, SETD4, MCTP2, ANKRD45, PAIP2B, TRIM71, ATP8A1, ADCK1, PCSK1, KLHL8, SLC16A12, RET, ALPL, ABLIM2, HEPACAM2, CPT1B, GRIPAP1, MTUS2, SLC46A3, GPRC5C, TBC1D19, ASXL3, MEGF9, PNPLA7, TSPYL2, ZC3H7A, DISC1, IGFBP5, KLK14, ANKRD16, PHPT1, PHKA1, H…
					NTNG2	WDFY4, ITPR1, NRXN3, HTR2C, TTC8, CPS1, MDM4, RORC, FGG, CAMKK1, KLHL32, NHEJ1, RPH3AL, SLC26A9, KIAA0319, DUOXA1, MYOM1, AR, EXTL1, ZNF444, OAT, BACE2, WNT4, SETD4, MCTP2, ANKRD45, PAIP2B, TRIM71, ATP8A1, ADCK1, PCSK1, KLHL8, SLC16A12, RET, ALPL, ABLIM2, HEPACAM2, CPT1B, GRIPAP1, MTUS2, SLC46A3, GPRC5C, TBC1D19, ASXL3, MEGF9, PNPLA7, TSPYL2, ZC3H7A, DISC1, IGFBP5, KLK14, ANKRD16, PHPT1, PHKA1, H…
					B4GALNT2	WDFY4, ITPR1, NRXN3, HTR2C, TTC8, CPS1, MDM4, RORC, FGG, CAMKK1, KLHL32, NHEJ1, RPH3AL, SLC26A9, KIAA0319, DUOXA1, MYOM1, AR, EXTL1, ZNF444, OAT, BACE2, WNT4, SETD4, MCTP2, ANKRD45, PAIP2B, TRIM71, ATP8A1, ADCK1, PCSK1, KLHL8, SLC16A12, RET, ALPL, ABLIM2, HEPACAM2, CPT1B, GRIPAP1, MTUS2, SLC46A3, GPRC5C, TBC1D19, ASXL3, MEGF9, PNPLA7, TSPYL2, ZC3H7A, DISC1, IGFBP5, KLK14, ANKRD16, PHPT1, PHKA1, H…
					ATP1B2	WDFY4, ITPR1, NRXN3, HTR2C, TTC8, CPS1, MDM4, RORC, FGG, CAMKK1, KLHL32, NHEJ1, RPH3AL, SLC26A9, KIAA0319, DUOXA1, MYOM1, AR, EXTL1, ZNF444, OAT, BACE2, WNT4, SETD4, MCTP2, ANKRD45, PAIP2B, TRIM71, ATP8A1, ADCK1, PCSK1, KLHL8, SLC16A12, RET, ALPL, ABLIM2, HEPACAM2, CPT1B, GRIPAP1, MTUS2, SLC46A3, GPRC5C, TBC1D19, ASXL3, MEGF9, PNPLA7, TSPYL2, ZC3H7A, DISC1, IGFBP5, KLK14, ANKRD16, PHPT1, PHKA1, H…
					FGA	WDFY4, ITPR1, NRXN3, HTR2C, TTC8, CPS1, MDM4, RORC, FGG, CAMKK1, KLHL32, NHEJ1, RPH3AL, SLC26A9, KIAA0319, DUOXA1, MYOM1, AR, EXTL1, ZNF444, OAT, BACE2, WNT4, SETD4, MCTP2, ANKRD45, PAIP2B, TRIM71, ATP8A1, ADCK1, PCSK1, KLHL8, SLC16A12, RET, ALPL, ABLIM2, HEPACAM2, CPT1B, GRIPAP1, MTUS2, SLC46A3, GPRC5C, TBC1D19, ASXL3, MEGF9, PNPLA7, TSPYL2, ZC3H7A, DISC1, IGFBP5, KLK14, ANKRD16, PHPT1, PHKA1, H…
					MYBPC1	WDFY4, ITPR1, NRXN3, HTR2C, TTC8, CPS1, MDM4, RORC, FGG, CAMKK1, KLHL32, NHEJ1, RPH3AL, SLC26A9, KIAA0319, DUOXA1, MYOM1, AR, EXTL1, ZNF444, OAT, BACE2, WNT4, SETD4, MCTP2, ANKRD45, PAIP2B, TRIM71, ATP8A1, ADCK1, PCSK1, KLHL8, SLC16A12, RET, ALPL, ABLIM2, HEPACAM2, CPT1B, GRIPAP1, MTUS2, SLC46A3, GPRC5C, TBC1D19, ASXL3, MEGF9, PNPLA7, TSPYL2, ZC3H7A, DISC1, IGFBP5, KLK14, ANKRD16, PHPT1, PHKA1, H…
					NXPH1	WDFY4, ITPR1, NRXN3, HTR2C, TTC8, CPS1, MDM4, RORC, FGG, CAMKK1, KLHL32, NHEJ1, RPH3AL, SLC26A9, KIAA0319, DUOXA1, MYOM1, AR, EXTL1, ZNF444, OAT, BACE2, WNT4, SETD4, MCTP2, ANKRD45, PAIP2B, TRIM71, ATP8A1, ADCK1, PCSK1, KLHL8, SLC16A12, RET, ALPL, ABLIM2, HEPACAM2, CPT1B, GRIPAP1, MTUS2, SLC46A3, GPRC5C, TBC1D19, ASXL3, MEGF9, PNPLA7, TSPYL2, ZC3H7A, DISC1, IGFBP5, KLK14, ANKRD16, PHPT1, PHKA1, H…
					SMAD9	WDFY4, ITPR1, NRXN3, HTR2C, TTC8, CPS1, MDM4, RORC, FGG, CAMKK1, KLHL32, NHEJ1, RPH3AL, SLC26A9, KIAA0319, DUOXA1, MYOM1, AR, EXTL1, ZNF444, OAT, BACE2, WNT4, SETD4, MCTP2, ANKRD45, PAIP2B, TRIM71, ATP8A1, ADCK1, PCSK1, KLHL8, SLC16A12, RET, ALPL, ABLIM2, HEPACAM2, CPT1B, GRIPAP1, MTUS2, SLC46A3, GPRC5C, TBC1D19, ASXL3, MEGF9, PNPLA7, TSPYL2, ZC3H7A, DISC1, IGFBP5, KLK14, ANKRD16, PHPT1, PHKA1, H…
					GPT	WDFY4, ITPR1, NRXN3, HTR2C, TTC8, CPS1, MDM4, RORC, FGG, CAMKK1, KLHL32, NHEJ1, RPH3AL, SLC26A9, KIAA0319, DUOXA1, MYOM1, AR, EXTL1, ZNF444, OAT, BACE2, WNT4, SETD4, MCTP2, ANKRD45, PAIP2B, TRIM71, ATP8A1, ADCK1, PCSK1, KLHL8, SLC16A12, RET, ALPL, ABLIM2, HEPACAM2, CPT1B, GRIPAP1, MTUS2, SLC46A3, GPRC5C, TBC1D19, ASXL3, MEGF9, PNPLA7, TSPYL2, ZC3H7A, DISC1, IGFBP5, KLK14, ANKRD16, PHPT1, PHKA1, H…
					CALCB	WDFY4, ITPR1, NRXN3, HTR2C, TTC8, CPS1, MDM4, RORC, FGG, CAMKK1, KLHL32, NHEJ1, RPH3AL, SLC26A9, KIAA0319, DUOXA1, MYOM1, AR, EXTL1, ZNF444, OAT, BACE2, WNT4, SETD4, MCTP2, ANKRD45, PAIP2B, TRIM71, ATP8A1, ADCK1, PCSK1, KLHL8, SLC16A12, RET, ALPL, ABLIM2, HEPACAM2, CPT1B, GRIPAP1, MTUS2, SLC46A3, GPRC5C, TBC1D19, ASXL3, MEGF9, PNPLA7, TSPYL2, ZC3H7A, DISC1, IGFBP5, KLK14, ANKRD16, PHPT1, PHKA1, H…
					ADCYAP1	WDFY4, ITPR1, NRXN3, HTR2C, TTC8, CPS1, MDM4, RORC, FGG, CAMKK1, KLHL32, NHEJ1, RPH3AL, SLC26A9, KIAA0319, DUOXA1, MYOM1, AR, EXTL1, ZNF444, OAT, BACE2, WNT4, SETD4, MCTP2, ANKRD45, PAIP2B, TRIM71, ATP8A1, ADCK1, PCSK1, KLHL8, SLC16A12, RET, ALPL, ABLIM2, HEPACAM2, CPT1B, GRIPAP1, MTUS2, SLC46A3, GPRC5C, TBC1D19, ASXL3, MEGF9, PNPLA7, TSPYL2, ZC3H7A, DISC1, IGFBP5, KLK14, ANKRD16, PHPT1, PHKA1, H…
					TFAP2B	WDFY4, ITPR1, NRXN3, HTR2C, TTC8, CPS1, MDM4, RORC, FGG, CAMKK1, KLHL32, NHEJ1, RPH3AL, SLC26A9, KIAA0319, DUOXA1, MYOM1, AR, EXTL1, ZNF444, OAT, BACE2, WNT4, SETD4, MCTP2, ANKRD45, PAIP2B, TRIM71, ATP8A1, ADCK1, PCSK1, KLHL8, SLC16A12, RET, ALPL, ABLIM2, HEPACAM2, CPT1B, GRIPAP1, MTUS2, SLC46A3, GPRC5C, TBC1D19, ASXL3, MEGF9, PNPLA7, TSPYL2, ZC3H7A, DISC1, IGFBP5, KLK14, ANKRD16, PHPT1, PHKA1, H…
					PAPPA	WDFY4, ITPR1, NRXN3, HTR2C, TTC8, CPS1, MDM4, RORC, FGG, CAMKK1, KLHL32, NHEJ1, RPH3AL, SLC26A9, KIAA0319, DUOXA1, MYOM1, AR, EXTL1, ZNF444, OAT, BACE2, WNT4, SETD4, MCTP2, ANKRD45, PAIP2B, TRIM71, ATP8A1, ADCK1, PCSK1, KLHL8, SLC16A12, RET, ALPL, ABLIM2, HEPACAM2, CPT1B, GRIPAP1, MTUS2, SLC46A3, GPRC5C, TBC1D19, ASXL3, MEGF9, PNPLA7, TSPYL2, ZC3H7A, DISC1, IGFBP5, KLK14, ANKRD16, PHPT1, PHKA1, H…
					LRRIQ4	WDFY4, ITPR1, NRXN3, HTR2C, TTC8, CPS1, MDM4, RORC, FGG, CAMKK1, KLHL32, NHEJ1, RPH3AL, SLC26A9, KIAA0319, DUOXA1, MYOM1, AR, EXTL1, ZNF444, OAT, BACE2, WNT4, SETD4, MCTP2, ANKRD45, PAIP2B, TRIM71, ATP8A1, ADCK1, PCSK1, KLHL8, SLC16A12, RET, ALPL, ABLIM2, HEPACAM2, CPT1B, GRIPAP1, MTUS2, SLC46A3, GPRC5C, TBC1D19, ASXL3, MEGF9, PNPLA7, TSPYL2, ZC3H7A, DISC1, IGFBP5, KLK14, ANKRD16, PHPT1, PHKA1, H…
					FAM46A	WDFY4, ITPR1, NRXN3, HTR2C, TTC8, CPS1, MDM4, RORC, FGG, CAMKK1, KLHL32, NHEJ1, RPH3AL, SLC26A9, KIAA0319, DUOXA1, MYOM1, AR, EXTL1, ZNF444, OAT, BACE2, WNT4, SETD4, MCTP2, ANKRD45, PAIP2B, TRIM71, ATP8A1, ADCK1, PCSK1, KLHL8, SLC16A12, RET, ALPL, ABLIM2, HEPACAM2, CPT1B, GRIPAP1, MTUS2, SLC46A3, GPRC5C, TBC1D19, ASXL3, MEGF9, PNPLA7, TSPYL2, ZC3H7A, DISC1, IGFBP5, KLK14, ANKRD16, PHPT1, PHKA1, H…
					C9orf152	WDFY4, ITPR1, NRXN3, HTR2C, TTC8, CPS1, MDM4, RORC, FGG, CAMKK1, KLHL32, NHEJ1, RPH3AL, SLC26A9, KIAA0319, DUOXA1, MYOM1, AR, EXTL1, ZNF444, OAT, BACE2, WNT4, SETD4, MCTP2, ANKRD45, PAIP2B, TRIM71, ATP8A1, ADCK1, PCSK1, KLHL8, SLC16A12, RET, ALPL, ABLIM2, HEPACAM2, CPT1B, GRIPAP1, MTUS2, SLC46A3, GPRC5C, TBC1D19, ASXL3, MEGF9, PNPLA7, TSPYL2, ZC3H7A, DISC1, IGFBP5, KLK14, ANKRD16, PHPT1, PHKA1, H…
					TTC39C	WDFY4, ITPR1, NRXN3, HTR2C, TTC8, CPS1, MDM4, RORC, FGG, CAMKK1, KLHL32, NHEJ1, RPH3AL, SLC26A9, KIAA0319, DUOXA1, MYOM1, AR, EXTL1, ZNF444, OAT, BACE2, WNT4, SETD4, MCTP2, ANKRD45, PAIP2B, TRIM71, ATP8A1, ADCK1, PCSK1, KLHL8, SLC16A12, RET, ALPL, ABLIM2, HEPACAM2, CPT1B, GRIPAP1, MTUS2, SLC46A3, GPRC5C, TBC1D19, ASXL3, MEGF9, PNPLA7, TSPYL2, ZC3H7A, DISC1, IGFBP5, KLK14, ANKRD16, PHPT1, PHKA1, H…
					CNTN4	WDFY4, ITPR1, NRXN3, HTR2C, TTC8, CPS1, MDM4, RORC, FGG, CAMKK1, KLHL32, NHEJ1, RPH3AL, SLC26A9, KIAA0319, DUOXA1, MYOM1, AR, EXTL1, ZNF444, OAT, BACE2, WNT4, SETD4, MCTP2, ANKRD45, PAIP2B, TRIM71, ATP8A1, ADCK1, PCSK1, KLHL8, SLC16A12, RET, ALPL, ABLIM2, HEPACAM2, CPT1B, GRIPAP1, MTUS2, SLC46A3, GPRC5C, TBC1D19, ASXL3, MEGF9, PNPLA7, TSPYL2, ZC3H7A, DISC1, IGFBP5, KLK14, ANKRD16, PHPT1, PHKA1, H…
					MUC6	WDFY4, ITPR1, NRXN3, HTR2C, TTC8, CPS1, MDM4, RORC, FGG, CAMKK1, KLHL32, NHEJ1, RPH3AL, SLC26A9, KIAA0319, DUOXA1, MYOM1, AR, EXTL1, ZNF444, OAT, BACE2, WNT4, SETD4, MCTP2, ANKRD45, PAIP2B, TRIM71, ATP8A1, ADCK1, PCSK1, KLHL8, SLC16A12, RET, ALPL, ABLIM2, HEPACAM2, CPT1B, GRIPAP1, MTUS2, SLC46A3, GPRC5C, TBC1D19, ASXL3, MEGF9, PNPLA7, TSPYL2, ZC3H7A, DISC1, IGFBP5, KLK14, ANKRD16, PHPT1, PHKA1, H…
					RAB3C	WDFY4, ITPR1, NRXN3, HTR2C, TTC8, CPS1, MDM4, RORC, FGG, CAMKK1, KLHL32, NHEJ1, RPH3AL, SLC26A9, KIAA0319, DUOXA1, MYOM1, AR, EXTL1, ZNF444, OAT, BACE2, WNT4, SETD4, MCTP2, ANKRD45, PAIP2B, TRIM71, ATP8A1, ADCK1, PCSK1, KLHL8, SLC16A12, RET, ALPL, ABLIM2, HEPACAM2, CPT1B, GRIPAP1, MTUS2, SLC46A3, GPRC5C, TBC1D19, ASXL3, MEGF9, PNPLA7, TSPYL2, ZC3H7A, DISC1, IGFBP5, KLK14, ANKRD16, PHPT1, PHKA1, H…
					CACNA1D	WDFY4, ITPR1, NRXN3, HTR2C, TTC8, CPS1, MDM4, RORC, FGG, CAMKK1, KLHL32, NHEJ1, RPH3AL, SLC26A9, KIAA0319, DUOXA1, MYOM1, AR, EXTL1, ZNF444, OAT, BACE2, WNT4, SETD4, MCTP2, ANKRD45, PAIP2B, TRIM71, ATP8A1, ADCK1, PCSK1, KLHL8, SLC16A12, RET, ALPL, ABLIM2, HEPACAM2, CPT1B, GRIPAP1, MTUS2, SLC46A3, GPRC5C, TBC1D19, ASXL3, MEGF9, PNPLA7, TSPYL2, ZC3H7A, DISC1, IGFBP5, KLK14, ANKRD16, PHPT1, PHKA1, H…
					DAPK2	WDFY4, ITPR1, NRXN3, HTR2C, TTC8, CPS1, MDM4, RORC, FGG, CAMKK1, KLHL32, NHEJ1, RPH3AL, SLC26A9, KIAA0319, DUOXA1, MYOM1, AR, EXTL1, ZNF444, OAT, BACE2, WNT4, SETD4, MCTP2, ANKRD45, PAIP2B, TRIM71, ATP8A1, ADCK1, PCSK1, KLHL8, SLC16A12, RET, ALPL, ABLIM2, HEPACAM2, CPT1B, GRIPAP1, MTUS2, SLC46A3, GPRC5C, TBC1D19, ASXL3, MEGF9, PNPLA7, TSPYL2, ZC3H7A, DISC1, IGFBP5, KLK14, ANKRD16, PHPT1, PHKA1, H…
					NOS2	WDFY4, ITPR1, NRXN3, HTR2C, TTC8, CPS1, MDM4, RORC, FGG, CAMKK1, KLHL32, NHEJ1, RPH3AL, SLC26A9, KIAA0319, DUOXA1, MYOM1, AR, EXTL1, ZNF444, OAT, BACE2, WNT4, SETD4, MCTP2, ANKRD45, PAIP2B, TRIM71, ATP8A1, ADCK1, PCSK1, KLHL8, SLC16A12, RET, ALPL, ABLIM2, HEPACAM2, CPT1B, GRIPAP1, MTUS2, SLC46A3, GPRC5C, TBC1D19, ASXL3, MEGF9, PNPLA7, TSPYL2, ZC3H7A, DISC1, IGFBP5, KLK14, ANKRD16, PHPT1, PHKA1, H…
					SLC22A3	WDFY4, ITPR1, NRXN3, HTR2C, TTC8, CPS1, MDM4, RORC, FGG, CAMKK1, KLHL32, NHEJ1, RPH3AL, SLC26A9, KIAA0319, DUOXA1, MYOM1, AR, EXTL1, ZNF444, OAT, BACE2, WNT4, SETD4, MCTP2, ANKRD45, PAIP2B, TRIM71, ATP8A1, ADCK1, PCSK1, KLHL8, SLC16A12, RET, ALPL, ABLIM2, HEPACAM2, CPT1B, GRIPAP1, MTUS2, SLC46A3, GPRC5C, TBC1D19, ASXL3, MEGF9, PNPLA7, TSPYL2, ZC3H7A, DISC1, IGFBP5, KLK14, ANKRD16, PHPT1, PHKA1, H…
					MYT1	WDFY4, ITPR1, NRXN3, HTR2C, TTC8, CPS1, MDM4, RORC, FGG, CAMKK1, KLHL32, NHEJ1, RPH3AL, SLC26A9, KIAA0319, DUOXA1, MYOM1, AR, EXTL1, ZNF444, OAT, BACE2, WNT4, SETD4, MCTP2, ANKRD45, PAIP2B, TRIM71, ATP8A1, ADCK1, PCSK1, KLHL8, SLC16A12, RET, ALPL, ABLIM2, HEPACAM2, CPT1B, GRIPAP1, MTUS2, SLC46A3, GPRC5C, TBC1D19, ASXL3, MEGF9, PNPLA7, TSPYL2, ZC3H7A, DISC1, IGFBP5, KLK14, ANKRD16, PHPT1, PHKA1, H…
					GKAP1	WDFY4, ITPR1, NRXN3, HTR2C, TTC8, CPS1, MDM4, RORC, FGG, CAMKK1, KLHL32, NHEJ1, RPH3AL, SLC26A9, KIAA0319, DUOXA1, MYOM1, AR, EXTL1, ZNF444, OAT, BACE2, WNT4, SETD4, MCTP2, ANKRD45, PAIP2B, TRIM71, ATP8A1, ADCK1, PCSK1, KLHL8, SLC16A12, RET, ALPL, ABLIM2, HEPACAM2, CPT1B, GRIPAP1, MTUS2, SLC46A3, GPRC5C, TBC1D19, ASXL3, MEGF9, PNPLA7, TSPYL2, ZC3H7A, DISC1, IGFBP5, KLK14, ANKRD16, PHPT1, PHKA1, H…
					EGFL7	WDFY4, ITPR1, NRXN3, HTR2C, TTC8, CPS1, MDM4, RORC, FGG, CAMKK1, KLHL32, NHEJ1, RPH3AL, SLC26A9, KIAA0319, DUOXA1, MYOM1, AR, EXTL1, ZNF444, OAT, BACE2, WNT4, SETD4, MCTP2, ANKRD45, PAIP2B, TRIM71, ATP8A1, ADCK1, PCSK1, KLHL8, SLC16A12, RET, ALPL, ABLIM2, HEPACAM2, CPT1B, GRIPAP1, MTUS2, SLC46A3, GPRC5C, TBC1D19, ASXL3, MEGF9, PNPLA7, TSPYL2, ZC3H7A, DISC1, IGFBP5, KLK14, ANKRD16, PHPT1, PHKA1, H…
					CCDC57	WDFY4, ITPR1, NRXN3, HTR2C, TTC8, CPS1, MDM4, RORC, FGG, CAMKK1, KLHL32, NHEJ1, RPH3AL, SLC26A9, KIAA0319, DUOXA1, MYOM1, AR, EXTL1, ZNF444, OAT, BACE2, WNT4, SETD4, MCTP2, ANKRD45, PAIP2B, TRIM71, ATP8A1, ADCK1, PCSK1, KLHL8, SLC16A12, RET, ALPL, ABLIM2, HEPACAM2, CPT1B, GRIPAP1, MTUS2, SLC46A3, GPRC5C, TBC1D19, ASXL3, MEGF9, PNPLA7, TSPYL2, ZC3H7A, DISC1, IGFBP5, KLK14, ANKRD16, PHPT1, PHKA1, H…
					FOXP2	WDFY4, ITPR1, NRXN3, HTR2C, TTC8, CPS1, MDM4, RORC, FGG, CAMKK1, KLHL32, NHEJ1, RPH3AL, SLC26A9, KIAA0319, DUOXA1, MYOM1, AR, EXTL1, ZNF444, OAT, BACE2, WNT4, SETD4, MCTP2, ANKRD45, PAIP2B, TRIM71, ATP8A1, ADCK1, PCSK1, KLHL8, SLC16A12, RET, ALPL, ABLIM2, HEPACAM2, CPT1B, GRIPAP1, MTUS2, SLC46A3, GPRC5C, TBC1D19, ASXL3, MEGF9, PNPLA7, TSPYL2, ZC3H7A, DISC1, IGFBP5, KLK14, ANKRD16, PHPT1, PHKA1, H…
					GABRB3	WDFY4, ITPR1, NRXN3, HTR2C, TTC8, CPS1, MDM4, RORC, FGG, CAMKK1, KLHL32, NHEJ1, RPH3AL, SLC26A9, KIAA0319, DUOXA1, MYOM1, AR, EXTL1, ZNF444, OAT, BACE2, WNT4, SETD4, MCTP2, ANKRD45, PAIP2B, TRIM71, ATP8A1, ADCK1, PCSK1, KLHL8, SLC16A12, RET, ALPL, ABLIM2, HEPACAM2, CPT1B, GRIPAP1, MTUS2, SLC46A3, GPRC5C, TBC1D19, ASXL3, MEGF9, PNPLA7, TSPYL2, ZC3H7A, DISC1, IGFBP5, KLK14, ANKRD16, PHPT1, PHKA1, H…
					CACNA2D3	WDFY4, ITPR1, NRXN3, HTR2C, TTC8, CPS1, MDM4, RORC, FGG, CAMKK1, KLHL32, NHEJ1, RPH3AL, SLC26A9, KIAA0319, DUOXA1, MYOM1, AR, EXTL1, ZNF444, OAT, BACE2, WNT4, SETD4, MCTP2, ANKRD45, PAIP2B, TRIM71, ATP8A1, ADCK1, PCSK1, KLHL8, SLC16A12, RET, ALPL, ABLIM2, HEPACAM2, CPT1B, GRIPAP1, MTUS2, SLC46A3, GPRC5C, TBC1D19, ASXL3, MEGF9, PNPLA7, TSPYL2, ZC3H7A, DISC1, IGFBP5, KLK14, ANKRD16, PHPT1, PHKA1, H…
					CSGALNACT1	WDFY4, ITPR1, NRXN3, HTR2C, TTC8, CPS1, MDM4, RORC, FGG, CAMKK1, KLHL32, NHEJ1, RPH3AL, SLC26A9, KIAA0319, DUOXA1, MYOM1, AR, EXTL1, ZNF444, OAT, BACE2, WNT4, SETD4, MCTP2, ANKRD45, PAIP2B, TRIM71, ATP8A1, ADCK1, PCSK1, KLHL8, SLC16A12, RET, ALPL, ABLIM2, HEPACAM2, CPT1B, GRIPAP1, MTUS2, SLC46A3, GPRC5C, TBC1D19, ASXL3, MEGF9, PNPLA7, TSPYL2, ZC3H7A, DISC1, IGFBP5, KLK14, ANKRD16, PHPT1, PHKA1, H…
					PDIA2	WDFY4, ITPR1, NRXN3, HTR2C, TTC8, CPS1, MDM4, RORC, FGG, CAMKK1, KLHL32, NHEJ1, RPH3AL, SLC26A9, KIAA0319, DUOXA1, MYOM1, AR, EXTL1, ZNF444, OAT, BACE2, WNT4, SETD4, MCTP2, ANKRD45, PAIP2B, TRIM71, ATP8A1, ADCK1, PCSK1, KLHL8, SLC16A12, RET, ALPL, ABLIM2, HEPACAM2, CPT1B, GRIPAP1, MTUS2, SLC46A3, GPRC5C, TBC1D19, ASXL3, MEGF9, PNPLA7, TSPYL2, ZC3H7A, DISC1, IGFBP5, KLK14, ANKRD16, PHPT1, PHKA1, H…
					HAL	WDFY4, ITPR1, NRXN3, HTR2C, TTC8, CPS1, MDM4, RORC, FGG, CAMKK1, KLHL32, NHEJ1, RPH3AL, SLC26A9, KIAA0319, DUOXA1, MYOM1, AR, EXTL1, ZNF444, OAT, BACE2, WNT4, SETD4, MCTP2, ANKRD45, PAIP2B, TRIM71, ATP8A1, ADCK1, PCSK1, KLHL8, SLC16A12, RET, ALPL, ABLIM2, HEPACAM2, CPT1B, GRIPAP1, MTUS2, SLC46A3, GPRC5C, TBC1D19, ASXL3, MEGF9, PNPLA7, TSPYL2, ZC3H7A, DISC1, IGFBP5, KLK14, ANKRD16, PHPT1, PHKA1, H…
					FAM184B	WDFY4, ITPR1, NRXN3, HTR2C, TTC8, CPS1, MDM4, RORC, FGG, CAMKK1, KLHL32, NHEJ1, RPH3AL, SLC26A9, KIAA0319, DUOXA1, MYOM1, AR, EXTL1, ZNF444, OAT, BACE2, WNT4, SETD4, MCTP2, ANKRD45, PAIP2B, TRIM71, ATP8A1, ADCK1, PCSK1, KLHL8, SLC16A12, RET, ALPL, ABLIM2, HEPACAM2, CPT1B, GRIPAP1, MTUS2, SLC46A3, GPRC5C, TBC1D19, ASXL3, MEGF9, PNPLA7, TSPYL2, ZC3H7A, DISC1, IGFBP5, KLK14, ANKRD16, PHPT1, PHKA1, H…
					ADH1C	WDFY4, ITPR1, NRXN3, HTR2C, TTC8, CPS1, MDM4, RORC, FGG, CAMKK1, KLHL32, NHEJ1, RPH3AL, SLC26A9, KIAA0319, DUOXA1, MYOM1, AR, EXTL1, ZNF444, OAT, BACE2, WNT4, SETD4, MCTP2, ANKRD45, PAIP2B, TRIM71, ATP8A1, ADCK1, PCSK1, KLHL8, SLC16A12, RET, ALPL, ABLIM2, HEPACAM2, CPT1B, GRIPAP1, MTUS2, SLC46A3, GPRC5C, TBC1D19, ASXL3, MEGF9, PNPLA7, TSPYL2, ZC3H7A, DISC1, IGFBP5, KLK14, ANKRD16, PHPT1, PHKA1, H…
					RPRM	WDFY4, ITPR1, NRXN3, HTR2C, TTC8, CPS1, MDM4, RORC, FGG, CAMKK1, KLHL32, NHEJ1, RPH3AL, SLC26A9, KIAA0319, DUOXA1, MYOM1, AR, EXTL1, ZNF444, OAT, BACE2, WNT4, SETD4, MCTP2, ANKRD45, PAIP2B, TRIM71, ATP8A1, ADCK1, PCSK1, KLHL8, SLC16A12, RET, ALPL, ABLIM2, HEPACAM2, CPT1B, GRIPAP1, MTUS2, SLC46A3, GPRC5C, TBC1D19, ASXL3, MEGF9, PNPLA7, TSPYL2, ZC3H7A, DISC1, IGFBP5, KLK14, ANKRD16, PHPT1, PHKA1, H…
					CD302	WDFY4, ITPR1, NRXN3, HTR2C, TTC8, CPS1, MDM4, RORC, FGG, CAMKK1, KLHL32, NHEJ1, RPH3AL, SLC26A9, KIAA0319, DUOXA1, MYOM1, AR, EXTL1, ZNF444, OAT, BACE2, WNT4, SETD4, MCTP2, ANKRD45, PAIP2B, TRIM71, ATP8A1, ADCK1, PCSK1, KLHL8, SLC16A12, RET, ALPL, ABLIM2, HEPACAM2, CPT1B, GRIPAP1, MTUS2, SLC46A3, GPRC5C, TBC1D19, ASXL3, MEGF9, PNPLA7, TSPYL2, ZC3H7A, DISC1, IGFBP5, KLK14, ANKRD16, PHPT1, PHKA1, H…
					LONRF3	WDFY4, ITPR1, NRXN3, HTR2C, TTC8, CPS1, MDM4, RORC, FGG, CAMKK1, KLHL32, NHEJ1, RPH3AL, SLC26A9, KIAA0319, DUOXA1, MYOM1, AR, EXTL1, ZNF444, OAT, BACE2, WNT4, SETD4, MCTP2, ANKRD45, PAIP2B, TRIM71, ATP8A1, ADCK1, PCSK1, KLHL8, SLC16A12, RET, ALPL, ABLIM2, HEPACAM2, CPT1B, GRIPAP1, MTUS2, SLC46A3, GPRC5C, TBC1D19, ASXL3, MEGF9, PNPLA7, TSPYL2, ZC3H7A, DISC1, IGFBP5, KLK14, ANKRD16, PHPT1, PHKA1, H…
					PILRB	WDFY4, ITPR1, NRXN3, HTR2C, TTC8, CPS1, MDM4, RORC, FGG, CAMKK1, KLHL32, NHEJ1, RPH3AL, SLC26A9, KIAA0319, DUOXA1, MYOM1, AR, EXTL1, ZNF444, OAT, BACE2, WNT4, SETD4, MCTP2, ANKRD45, PAIP2B, TRIM71, ATP8A1, ADCK1, PCSK1, KLHL8, SLC16A12, RET, ALPL, ABLIM2, HEPACAM2, CPT1B, GRIPAP1, MTUS2, SLC46A3, GPRC5C, TBC1D19, ASXL3, MEGF9, PNPLA7, TSPYL2, ZC3H7A, DISC1, IGFBP5, KLK14, ANKRD16, PHPT1, PHKA1, H…
					HSD17B13	WDFY4, ITPR1, NRXN3, HTR2C, TTC8, CPS1, MDM4, RORC, FGG, CAMKK1, KLHL32, NHEJ1, RPH3AL, SLC26A9, KIAA0319, DUOXA1, MYOM1, AR, EXTL1, ZNF444, OAT, BACE2, WNT4, SETD4, MCTP2, ANKRD45, PAIP2B, TRIM71, ATP8A1, ADCK1, PCSK1, KLHL8, SLC16A12, RET, ALPL, ABLIM2, HEPACAM2, CPT1B, GRIPAP1, MTUS2, SLC46A3, GPRC5C, TBC1D19, ASXL3, MEGF9, PNPLA7, TSPYL2, ZC3H7A, DISC1, IGFBP5, KLK14, ANKRD16, PHPT1, PHKA1, H…
					FAM105A	WDFY4, ITPR1, NRXN3, HTR2C, TTC8, CPS1, MDM4, RORC, FGG, CAMKK1, KLHL32, NHEJ1, RPH3AL, SLC26A9, KIAA0319, DUOXA1, MYOM1, AR, EXTL1, ZNF444, OAT, BACE2, WNT4, SETD4, MCTP2, ANKRD45, PAIP2B, TRIM71, ATP8A1, ADCK1, PCSK1, KLHL8, SLC16A12, RET, ALPL, ABLIM2, HEPACAM2, CPT1B, GRIPAP1, MTUS2, SLC46A3, GPRC5C, TBC1D19, ASXL3, MEGF9, PNPLA7, TSPYL2, ZC3H7A, DISC1, IGFBP5, KLK14, ANKRD16, PHPT1, PHKA1, H…
					ANGPTL3	WDFY4, ITPR1, NRXN3, HTR2C, TTC8, CPS1, MDM4, RORC, FGG, CAMKK1, KLHL32, NHEJ1, RPH3AL, SLC26A9, KIAA0319, DUOXA1, MYOM1, AR, EXTL1, ZNF444, OAT, BACE2, WNT4, SETD4, MCTP2, ANKRD45, PAIP2B, TRIM71, ATP8A1, ADCK1, PCSK1, KLHL8, SLC16A12, RET, ALPL, ABLIM2, HEPACAM2, CPT1B, GRIPAP1, MTUS2, SLC46A3, GPRC5C, TBC1D19, ASXL3, MEGF9, PNPLA7, TSPYL2, ZC3H7A, DISC1, IGFBP5, KLK14, ANKRD16, PHPT1, PHKA1, H…
					SYBU	WDFY4, ITPR1, NRXN3, HTR2C, TTC8, CPS1, MDM4, RORC, FGG, CAMKK1, KLHL32, NHEJ1, RPH3AL, SLC26A9, KIAA0319, DUOXA1, MYOM1, AR, EXTL1, ZNF444, OAT, BACE2, WNT4, SETD4, MCTP2, ANKRD45, PAIP2B, TRIM71, ATP8A1, ADCK1, PCSK1, KLHL8, SLC16A12, RET, ALPL, ABLIM2, HEPACAM2, CPT1B, GRIPAP1, MTUS2, SLC46A3, GPRC5C, TBC1D19, ASXL3, MEGF9, PNPLA7, TSPYL2, ZC3H7A, DISC1, IGFBP5, KLK14, ANKRD16, PHPT1, PHKA1, H…
					LPAR3	WDFY4, ITPR1, NRXN3, HTR2C, TTC8, CPS1, MDM4, RORC, FGG, CAMKK1, KLHL32, NHEJ1, RPH3AL, SLC26A9, KIAA0319, DUOXA1, MYOM1, AR, EXTL1, ZNF444, OAT, BACE2, WNT4, SETD4, MCTP2, ANKRD45, PAIP2B, TRIM71, ATP8A1, ADCK1, PCSK1, KLHL8, SLC16A12, RET, ALPL, ABLIM2, HEPACAM2, CPT1B, GRIPAP1, MTUS2, SLC46A3, GPRC5C, TBC1D19, ASXL3, MEGF9, PNPLA7, TSPYL2, ZC3H7A, DISC1, IGFBP5, KLK14, ANKRD16, PHPT1, PHKA1, H…
					KL	WDFY4, ITPR1, NRXN3, HTR2C, TTC8, CPS1, MDM4, RORC, FGG, CAMKK1, KLHL32, NHEJ1, RPH3AL, SLC26A9, KIAA0319, DUOXA1, MYOM1, AR, EXTL1, ZNF444, OAT, BACE2, WNT4, SETD4, MCTP2, ANKRD45, PAIP2B, TRIM71, ATP8A1, ADCK1, PCSK1, KLHL8, SLC16A12, RET, ALPL, ABLIM2, HEPACAM2, CPT1B, GRIPAP1, MTUS2, SLC46A3, GPRC5C, TBC1D19, ASXL3, MEGF9, PNPLA7, TSPYL2, ZC3H7A, DISC1, IGFBP5, KLK14, ANKRD16, PHPT1, PHKA1, H…
					SULT1A3	WDFY4, ITPR1, NRXN3, HTR2C, TTC8, CPS1, MDM4, RORC, FGG, CAMKK1, KLHL32, NHEJ1, RPH3AL, SLC26A9, KIAA0319, DUOXA1, MYOM1, AR, EXTL1, ZNF444, OAT, BACE2, WNT4, SETD4, MCTP2, ANKRD45, PAIP2B, TRIM71, ATP8A1, ADCK1, PCSK1, KLHL8, SLC16A12, RET, ALPL, ABLIM2, HEPACAM2, CPT1B, GRIPAP1, MTUS2, SLC46A3, GPRC5C, TBC1D19, ASXL3, MEGF9, PNPLA7, TSPYL2, ZC3H7A, DISC1, IGFBP5, KLK14, ANKRD16, PHPT1, PHKA1, H…
					GNAI1	WDFY4, ITPR1, NRXN3, HTR2C, TTC8, CPS1, MDM4, RORC, FGG, CAMKK1, KLHL32, NHEJ1, RPH3AL, SLC26A9, KIAA0319, DUOXA1, MYOM1, AR, EXTL1, ZNF444, OAT, BACE2, WNT4, SETD4, MCTP2, ANKRD45, PAIP2B, TRIM71, ATP8A1, ADCK1, PCSK1, KLHL8, SLC16A12, RET, ALPL, ABLIM2, HEPACAM2, CPT1B, GRIPAP1, MTUS2, SLC46A3, GPRC5C, TBC1D19, ASXL3, MEGF9, PNPLA7, TSPYL2, ZC3H7A, DISC1, IGFBP5, KLK14, ANKRD16, PHPT1, PHKA1, H…
					PF4V1	WDFY4, ITPR1, NRXN3, HTR2C, TTC8, CPS1, MDM4, RORC, FGG, CAMKK1, KLHL32, NHEJ1, RPH3AL, SLC26A9, KIAA0319, DUOXA1, MYOM1, AR, EXTL1, ZNF444, OAT, BACE2, WNT4, SETD4, MCTP2, ANKRD45, PAIP2B, TRIM71, ATP8A1, ADCK1, PCSK1, KLHL8, SLC16A12, RET, ALPL, ABLIM2, HEPACAM2, CPT1B, GRIPAP1, MTUS2, SLC46A3, GPRC5C, TBC1D19, ASXL3, MEGF9, PNPLA7, TSPYL2, ZC3H7A, DISC1, IGFBP5, KLK14, ANKRD16, PHPT1, PHKA1, H…
					PDK4	WDFY4, ITPR1, NRXN3, HTR2C, TTC8, CPS1, MDM4, RORC, FGG, CAMKK1, KLHL32, NHEJ1, RPH3AL, SLC26A9, KIAA0319, DUOXA1, MYOM1, AR, EXTL1, ZNF444, OAT, BACE2, WNT4, SETD4, MCTP2, ANKRD45, PAIP2B, TRIM71, ATP8A1, ADCK1, PCSK1, KLHL8, SLC16A12, RET, ALPL, ABLIM2, HEPACAM2, CPT1B, GRIPAP1, MTUS2, SLC46A3, GPRC5C, TBC1D19, ASXL3, MEGF9, PNPLA7, TSPYL2, ZC3H7A, DISC1, IGFBP5, KLK14, ANKRD16, PHPT1, PHKA1, H…
					SCN3A	WDFY4, ITPR1, NRXN3, HTR2C, TTC8, CPS1, MDM4, RORC, FGG, CAMKK1, KLHL32, NHEJ1, RPH3AL, SLC26A9, KIAA0319, DUOXA1, MYOM1, AR, EXTL1, ZNF444, OAT, BACE2, WNT4, SETD4, MCTP2, ANKRD45, PAIP2B, TRIM71, ATP8A1, ADCK1, PCSK1, KLHL8, SLC16A12, RET, ALPL, ABLIM2, HEPACAM2, CPT1B, GRIPAP1, MTUS2, SLC46A3, GPRC5C, TBC1D19, ASXL3, MEGF9, PNPLA7, TSPYL2, ZC3H7A, DISC1, IGFBP5, KLK14, ANKRD16, PHPT1, PHKA1, H…
					AFF3	WDFY4, ITPR1, NRXN3, HTR2C, TTC8, CPS1, MDM4, RORC, FGG, CAMKK1, KLHL32, NHEJ1, RPH3AL, SLC26A9, KIAA0319, DUOXA1, MYOM1, AR, EXTL1, ZNF444, OAT, BACE2, WNT4, SETD4, MCTP2, ANKRD45, PAIP2B, TRIM71, ATP8A1, ADCK1, PCSK1, KLHL8, SLC16A12, RET, ALPL, ABLIM2, HEPACAM2, CPT1B, GRIPAP1, MTUS2, SLC46A3, GPRC5C, TBC1D19, ASXL3, MEGF9, PNPLA7, TSPYL2, ZC3H7A, DISC1, IGFBP5, KLK14, ANKRD16, PHPT1, PHKA1, H…
					DUSP22	WDFY4, ITPR1, NRXN3, HTR2C, TTC8, CPS1, MDM4, RORC, FGG, CAMKK1, KLHL32, NHEJ1, RPH3AL, SLC26A9, KIAA0319, DUOXA1, MYOM1, AR, EXTL1, ZNF444, OAT, BACE2, WNT4, SETD4, MCTP2, ANKRD45, PAIP2B, TRIM71, ATP8A1, ADCK1, PCSK1, KLHL8, SLC16A12, RET, ALPL, ABLIM2, HEPACAM2, CPT1B, GRIPAP1, MTUS2, SLC46A3, GPRC5C, TBC1D19, ASXL3, MEGF9, PNPLA7, TSPYL2, ZC3H7A, DISC1, IGFBP5, KLK14, ANKRD16, PHPT1, PHKA1, H…
					ZNF692	WDFY4, ITPR1, NRXN3, HTR2C, TTC8, CPS1, MDM4, RORC, FGG, CAMKK1, KLHL32, NHEJ1, RPH3AL, SLC26A9, KIAA0319, DUOXA1, MYOM1, AR, EXTL1, ZNF444, OAT, BACE2, WNT4, SETD4, MCTP2, ANKRD45, PAIP2B, TRIM71, ATP8A1, ADCK1, PCSK1, KLHL8, SLC16A12, RET, ALPL, ABLIM2, HEPACAM2, CPT1B, GRIPAP1, MTUS2, SLC46A3, GPRC5C, TBC1D19, ASXL3, MEGF9, PNPLA7, TSPYL2, ZC3H7A, DISC1, IGFBP5, KLK14, ANKRD16, PHPT1, PHKA1, H…
					DRP2	WDFY4, ITPR1, NRXN3, HTR2C, TTC8, CPS1, MDM4, RORC, FGG, CAMKK1, KLHL32, NHEJ1, RPH3AL, SLC26A9, KIAA0319, DUOXA1, MYOM1, AR, EXTL1, ZNF444, OAT, BACE2, WNT4, SETD4, MCTP2, ANKRD45, PAIP2B, TRIM71, ATP8A1, ADCK1, PCSK1, KLHL8, SLC16A12, RET, ALPL, ABLIM2, HEPACAM2, CPT1B, GRIPAP1, MTUS2, SLC46A3, GPRC5C, TBC1D19, ASXL3, MEGF9, PNPLA7, TSPYL2, ZC3H7A, DISC1, IGFBP5, KLK14, ANKRD16, PHPT1, PHKA1, H…
					CNTN3	WDFY4, ITPR1, NRXN3, HTR2C, TTC8, CPS1, MDM4, RORC, FGG, CAMKK1, KLHL32, NHEJ1, RPH3AL, SLC26A9, KIAA0319, DUOXA1, MYOM1, AR, EXTL1, ZNF444, OAT, BACE2, WNT4, SETD4, MCTP2, ANKRD45, PAIP2B, TRIM71, ATP8A1, ADCK1, PCSK1, KLHL8, SLC16A12, RET, ALPL, ABLIM2, HEPACAM2, CPT1B, GRIPAP1, MTUS2, SLC46A3, GPRC5C, TBC1D19, ASXL3, MEGF9, PNPLA7, TSPYL2, ZC3H7A, DISC1, IGFBP5, KLK14, ANKRD16, PHPT1, PHKA1, H…
					DHTKD1	WDFY4, ITPR1, NRXN3, HTR2C, TTC8, CPS1, MDM4, RORC, FGG, CAMKK1, KLHL32, NHEJ1, RPH3AL, SLC26A9, KIAA0319, DUOXA1, MYOM1, AR, EXTL1, ZNF444, OAT, BACE2, WNT4, SETD4, MCTP2, ANKRD45, PAIP2B, TRIM71, ATP8A1, ADCK1, PCSK1, KLHL8, SLC16A12, RET, ALPL, ABLIM2, HEPACAM2, CPT1B, GRIPAP1, MTUS2, SLC46A3, GPRC5C, TBC1D19, ASXL3, MEGF9, PNPLA7, TSPYL2, ZC3H7A, DISC1, IGFBP5, KLK14, ANKRD16, PHPT1, PHKA1, H…
					C11orf16	WDFY4, ITPR1, NRXN3, HTR2C, TTC8, CPS1, MDM4, RORC, FGG, CAMKK1, KLHL32, NHEJ1, RPH3AL, SLC26A9, KIAA0319, DUOXA1, MYOM1, AR, EXTL1, ZNF444, OAT, BACE2, WNT4, SETD4, MCTP2, ANKRD45, PAIP2B, TRIM71, ATP8A1, ADCK1, PCSK1, KLHL8, SLC16A12, RET, ALPL, ABLIM2, HEPACAM2, CPT1B, GRIPAP1, MTUS2, SLC46A3, GPRC5C, TBC1D19, ASXL3, MEGF9, PNPLA7, TSPYL2, ZC3H7A, DISC1, IGFBP5, KLK14, ANKRD16, PHPT1, PHKA1, H…
					MYRIP	WDFY4, ITPR1, NRXN3, HTR2C, TTC8, CPS1, MDM4, RORC, FGG, CAMKK1, KLHL32, NHEJ1, RPH3AL, SLC26A9, KIAA0319, DUOXA1, MYOM1, AR, EXTL1, ZNF444, OAT, BACE2, WNT4, SETD4, MCTP2, ANKRD45, PAIP2B, TRIM71, ATP8A1, ADCK1, PCSK1, KLHL8, SLC16A12, RET, ALPL, ABLIM2, HEPACAM2, CPT1B, GRIPAP1, MTUS2, SLC46A3, GPRC5C, TBC1D19, ASXL3, MEGF9, PNPLA7, TSPYL2, ZC3H7A, DISC1, IGFBP5, KLK14, ANKRD16, PHPT1, PHKA1, H…
					EDA	WDFY4, ITPR1, NRXN3, HTR2C, TTC8, CPS1, MDM4, RORC, FGG, CAMKK1, KLHL32, NHEJ1, RPH3AL, SLC26A9, KIAA0319, DUOXA1, MYOM1, AR, EXTL1, ZNF444, OAT, BACE2, WNT4, SETD4, MCTP2, ANKRD45, PAIP2B, TRIM71, ATP8A1, ADCK1, PCSK1, KLHL8, SLC16A12, RET, ALPL, ABLIM2, HEPACAM2, CPT1B, GRIPAP1, MTUS2, SLC46A3, GPRC5C, TBC1D19, ASXL3, MEGF9, PNPLA7, TSPYL2, ZC3H7A, DISC1, IGFBP5, KLK14, ANKRD16, PHPT1, PHKA1, H…
					SLC6A1	WDFY4, ITPR1, NRXN3, HTR2C, TTC8, CPS1, MDM4, RORC, FGG, CAMKK1, KLHL32, NHEJ1, RPH3AL, SLC26A9, KIAA0319, DUOXA1, MYOM1, AR, EXTL1, ZNF444, OAT, BACE2, WNT4, SETD4, MCTP2, ANKRD45, PAIP2B, TRIM71, ATP8A1, ADCK1, PCSK1, KLHL8, SLC16A12, RET, ALPL, ABLIM2, HEPACAM2, CPT1B, GRIPAP1, MTUS2, SLC46A3, GPRC5C, TBC1D19, ASXL3, MEGF9, PNPLA7, TSPYL2, ZC3H7A, DISC1, IGFBP5, KLK14, ANKRD16, PHPT1, PHKA1, H…
					VNN1	WDFY4, ITPR1, NRXN3, HTR2C, TTC8, CPS1, MDM4, RORC, FGG, CAMKK1, KLHL32, NHEJ1, RPH3AL, SLC26A9, KIAA0319, DUOXA1, MYOM1, AR, EXTL1, ZNF444, OAT, BACE2, WNT4, SETD4, MCTP2, ANKRD45, PAIP2B, TRIM71, ATP8A1, ADCK1, PCSK1, KLHL8, SLC16A12, RET, ALPL, ABLIM2, HEPACAM2, CPT1B, GRIPAP1, MTUS2, SLC46A3, GPRC5C, TBC1D19, ASXL3, MEGF9, PNPLA7, TSPYL2, ZC3H7A, DISC1, IGFBP5, KLK14, ANKRD16, PHPT1, PHKA1, H…
					NOTUM	WDFY4, ITPR1, NRXN3, HTR2C, TTC8, CPS1, MDM4, RORC, FGG, CAMKK1, KLHL32, NHEJ1, RPH3AL, SLC26A9, KIAA0319, DUOXA1, MYOM1, AR, EXTL1, ZNF444, OAT, BACE2, WNT4, SETD4, MCTP2, ANKRD45, PAIP2B, TRIM71, ATP8A1, ADCK1, PCSK1, KLHL8, SLC16A12, RET, ALPL, ABLIM2, HEPACAM2, CPT1B, GRIPAP1, MTUS2, SLC46A3, GPRC5C, TBC1D19, ASXL3, MEGF9, PNPLA7, TSPYL2, ZC3H7A, DISC1, IGFBP5, KLK14, ANKRD16, PHPT1, PHKA1, H…
					PLCB4	WDFY4, ITPR1, NRXN3, HTR2C, TTC8, CPS1, MDM4, RORC, FGG, CAMKK1, KLHL32, NHEJ1, RPH3AL, SLC26A9, KIAA0319, DUOXA1, MYOM1, AR, EXTL1, ZNF444, OAT, BACE2, WNT4, SETD4, MCTP2, ANKRD45, PAIP2B, TRIM71, ATP8A1, ADCK1, PCSK1, KLHL8, SLC16A12, RET, ALPL, ABLIM2, HEPACAM2, CPT1B, GRIPAP1, MTUS2, SLC46A3, GPRC5C, TBC1D19, ASXL3, MEGF9, PNPLA7, TSPYL2, ZC3H7A, DISC1, IGFBP5, KLK14, ANKRD16, PHPT1, PHKA1, H…
					CSMD1	WDFY4, ITPR1, NRXN3, HTR2C, TTC8, CPS1, MDM4, RORC, FGG, CAMKK1, KLHL32, NHEJ1, RPH3AL, SLC26A9, KIAA0319, DUOXA1, MYOM1, AR, EXTL1, ZNF444, OAT, BACE2, WNT4, SETD4, MCTP2, ANKRD45, PAIP2B, TRIM71, ATP8A1, ADCK1, PCSK1, KLHL8, SLC16A12, RET, ALPL, ABLIM2, HEPACAM2, CPT1B, GRIPAP1, MTUS2, SLC46A3, GPRC5C, TBC1D19, ASXL3, MEGF9, PNPLA7, TSPYL2, ZC3H7A, DISC1, IGFBP5, KLK14, ANKRD16, PHPT1, PHKA1, H…
					CDHR3	WDFY4, ITPR1, NRXN3, HTR2C, TTC8, CPS1, MDM4, RORC, FGG, CAMKK1, KLHL32, NHEJ1, RPH3AL, SLC26A9, KIAA0319, DUOXA1, MYOM1, AR, EXTL1, ZNF444, OAT, BACE2, WNT4, SETD4, MCTP2, ANKRD45, PAIP2B, TRIM71, ATP8A1, ADCK1, PCSK1, KLHL8, SLC16A12, RET, ALPL, ABLIM2, HEPACAM2, CPT1B, GRIPAP1, MTUS2, SLC46A3, GPRC5C, TBC1D19, ASXL3, MEGF9, PNPLA7, TSPYL2, ZC3H7A, DISC1, IGFBP5, KLK14, ANKRD16, PHPT1, PHKA1, H…
					NXF3	WDFY4, ITPR1, NRXN3, HTR2C, TTC8, CPS1, MDM4, RORC, FGG, CAMKK1, KLHL32, NHEJ1, RPH3AL, SLC26A9, KIAA0319, DUOXA1, MYOM1, AR, EXTL1, ZNF444, OAT, BACE2, WNT4, SETD4, MCTP2, ANKRD45, PAIP2B, TRIM71, ATP8A1, ADCK1, PCSK1, KLHL8, SLC16A12, RET, ALPL, ABLIM2, HEPACAM2, CPT1B, GRIPAP1, MTUS2, SLC46A3, GPRC5C, TBC1D19, ASXL3, MEGF9, PNPLA7, TSPYL2, ZC3H7A, DISC1, IGFBP5, KLK14, ANKRD16, PHPT1, PHKA1, H…
					METTL7A	WDFY4, ITPR1, NRXN3, HTR2C, TTC8, CPS1, MDM4, RORC, FGG, CAMKK1, KLHL32, NHEJ1, RPH3AL, SLC26A9, KIAA0319, DUOXA1, MYOM1, AR, EXTL1, ZNF444, OAT, BACE2, WNT4, SETD4, MCTP2, ANKRD45, PAIP2B, TRIM71, ATP8A1, ADCK1, PCSK1, KLHL8, SLC16A12, RET, ALPL, ABLIM2, HEPACAM2, CPT1B, GRIPAP1, MTUS2, SLC46A3, GPRC5C, TBC1D19, ASXL3, MEGF9, PNPLA7, TSPYL2, ZC3H7A, DISC1, IGFBP5, KLK14, ANKRD16, PHPT1, PHKA1, H…
					AMPH	WDFY4, ITPR1, NRXN3, HTR2C, TTC8, CPS1, MDM4, RORC, FGG, CAMKK1, KLHL32, NHEJ1, RPH3AL, SLC26A9, KIAA0319, DUOXA1, MYOM1, AR, EXTL1, ZNF444, OAT, BACE2, WNT4, SETD4, MCTP2, ANKRD45, PAIP2B, TRIM71, ATP8A1, ADCK1, PCSK1, KLHL8, SLC16A12, RET, ALPL, ABLIM2, HEPACAM2, CPT1B, GRIPAP1, MTUS2, SLC46A3, GPRC5C, TBC1D19, ASXL3, MEGF9, PNPLA7, TSPYL2, ZC3H7A, DISC1, IGFBP5, KLK14, ANKRD16, PHPT1, PHKA1, H…
					TMED6	WDFY4, ITPR1, NRXN3, HTR2C, TTC8, CPS1, MDM4, RORC, FGG, CAMKK1, KLHL32, NHEJ1, RPH3AL, SLC26A9, KIAA0319, DUOXA1, MYOM1, AR, EXTL1, ZNF444, OAT, BACE2, WNT4, SETD4, MCTP2, ANKRD45, PAIP2B, TRIM71, ATP8A1, ADCK1, PCSK1, KLHL8, SLC16A12, RET, ALPL, ABLIM2, HEPACAM2, CPT1B, GRIPAP1, MTUS2, SLC46A3, GPRC5C, TBC1D19, ASXL3, MEGF9, PNPLA7, TSPYL2, ZC3H7A, DISC1, IGFBP5, KLK14, ANKRD16, PHPT1, PHKA1, H…
					KHDRBS3	WDFY4, ITPR1, NRXN3, HTR2C, TTC8, CPS1, MDM4, RORC, FGG, CAMKK1, KLHL32, NHEJ1, RPH3AL, SLC26A9, KIAA0319, DUOXA1, MYOM1, AR, EXTL1, ZNF444, OAT, BACE2, WNT4, SETD4, MCTP2, ANKRD45, PAIP2B, TRIM71, ATP8A1, ADCK1, PCSK1, KLHL8, SLC16A12, RET, ALPL, ABLIM2, HEPACAM2, CPT1B, GRIPAP1, MTUS2, SLC46A3, GPRC5C, TBC1D19, ASXL3, MEGF9, PNPLA7, TSPYL2, ZC3H7A, DISC1, IGFBP5, KLK14, ANKRD16, PHPT1, PHKA1, H…
					SLC1A2	WDFY4, ITPR1, NRXN3, HTR2C, TTC8, CPS1, MDM4, RORC, FGG, CAMKK1, KLHL32, NHEJ1, RPH3AL, SLC26A9, KIAA0319, DUOXA1, MYOM1, AR, EXTL1, ZNF444, OAT, BACE2, WNT4, SETD4, MCTP2, ANKRD45, PAIP2B, TRIM71, ATP8A1, ADCK1, PCSK1, KLHL8, SLC16A12, RET, ALPL, ABLIM2, HEPACAM2, CPT1B, GRIPAP1, MTUS2, SLC46A3, GPRC5C, TBC1D19, ASXL3, MEGF9, PNPLA7, TSPYL2, ZC3H7A, DISC1, IGFBP5, KLK14, ANKRD16, PHPT1, PHKA1, H…
					SCN9A	WDFY4, ITPR1, NRXN3, HTR2C, TTC8, CPS1, MDM4, RORC, FGG, CAMKK1, KLHL32, NHEJ1, RPH3AL, SLC26A9, KIAA0319, DUOXA1, MYOM1, AR, EXTL1, ZNF444, OAT, BACE2, WNT4, SETD4, MCTP2, ANKRD45, PAIP2B, TRIM71, ATP8A1, ADCK1, PCSK1, KLHL8, SLC16A12, RET, ALPL, ABLIM2, HEPACAM2, CPT1B, GRIPAP1, MTUS2, SLC46A3, GPRC5C, TBC1D19, ASXL3, MEGF9, PNPLA7, TSPYL2, ZC3H7A, DISC1, IGFBP5, KLK14, ANKRD16, PHPT1, PHKA1, H…
					SLC26A1	WDFY4, ITPR1, NRXN3, HTR2C, TTC8, CPS1, MDM4, RORC, FGG, CAMKK1, KLHL32, NHEJ1, RPH3AL, SLC26A9, KIAA0319, DUOXA1, MYOM1, AR, EXTL1, ZNF444, OAT, BACE2, WNT4, SETD4, MCTP2, ANKRD45, PAIP2B, TRIM71, ATP8A1, ADCK1, PCSK1, KLHL8, SLC16A12, RET, ALPL, ABLIM2, HEPACAM2, CPT1B, GRIPAP1, MTUS2, SLC46A3, GPRC5C, TBC1D19, ASXL3, MEGF9, PNPLA7, TSPYL2, ZC3H7A, DISC1, IGFBP5, KLK14, ANKRD16, PHPT1, PHKA1, H…
					NPC1L1	WDFY4, ITPR1, NRXN3, HTR2C, TTC8, CPS1, MDM4, RORC, FGG, CAMKK1, KLHL32, NHEJ1, RPH3AL, SLC26A9, KIAA0319, DUOXA1, MYOM1, AR, EXTL1, ZNF444, OAT, BACE2, WNT4, SETD4, MCTP2, ANKRD45, PAIP2B, TRIM71, ATP8A1, ADCK1, PCSK1, KLHL8, SLC16A12, RET, ALPL, ABLIM2, HEPACAM2, CPT1B, GRIPAP1, MTUS2, SLC46A3, GPRC5C, TBC1D19, ASXL3, MEGF9, PNPLA7, TSPYL2, ZC3H7A, DISC1, IGFBP5, KLK14, ANKRD16, PHPT1, PHKA1, H…
					RFTN1	WDFY4, ITPR1, NRXN3, HTR2C, TTC8, CPS1, MDM4, RORC, FGG, CAMKK1, KLHL32, NHEJ1, RPH3AL, SLC26A9, KIAA0319, DUOXA1, MYOM1, AR, EXTL1, ZNF444, OAT, BACE2, WNT4, SETD4, MCTP2, ANKRD45, PAIP2B, TRIM71, ATP8A1, ADCK1, PCSK1, KLHL8, SLC16A12, RET, ALPL, ABLIM2, HEPACAM2, CPT1B, GRIPAP1, MTUS2, SLC46A3, GPRC5C, TBC1D19, ASXL3, MEGF9, PNPLA7, TSPYL2, ZC3H7A, DISC1, IGFBP5, KLK14, ANKRD16, PHPT1, PHKA1, H…
					TRPM3	WDFY4, ITPR1, NRXN3, HTR2C, TTC8, CPS1, MDM4, RORC, FGG, CAMKK1, KLHL32, NHEJ1, RPH3AL, SLC26A9, KIAA0319, DUOXA1, MYOM1, AR, EXTL1, ZNF444, OAT, BACE2, WNT4, SETD4, MCTP2, ANKRD45, PAIP2B, TRIM71, ATP8A1, ADCK1, PCSK1, KLHL8, SLC16A12, RET, ALPL, ABLIM2, HEPACAM2, CPT1B, GRIPAP1, MTUS2, SLC46A3, GPRC5C, TBC1D19, ASXL3, MEGF9, PNPLA7, TSPYL2, ZC3H7A, DISC1, IGFBP5, KLK14, ANKRD16, PHPT1, PHKA1, H…
					SLC7A2	WDFY4, ITPR1, NRXN3, HTR2C, TTC8, CPS1, MDM4, RORC, FGG, CAMKK1, KLHL32, NHEJ1, RPH3AL, SLC26A9, KIAA0319, DUOXA1, MYOM1, AR, EXTL1, ZNF444, OAT, BACE2, WNT4, SETD4, MCTP2, ANKRD45, PAIP2B, TRIM71, ATP8A1, ADCK1, PCSK1, KLHL8, SLC16A12, RET, ALPL, ABLIM2, HEPACAM2, CPT1B, GRIPAP1, MTUS2, SLC46A3, GPRC5C, TBC1D19, ASXL3, MEGF9, PNPLA7, TSPYL2, ZC3H7A, DISC1, IGFBP5, KLK14, ANKRD16, PHPT1, PHKA1, H…
					ST6GALNAC1	WDFY4, ITPR1, NRXN3, HTR2C, TTC8, CPS1, MDM4, RORC, FGG, CAMKK1, KLHL32, NHEJ1, RPH3AL, SLC26A9, KIAA0319, DUOXA1, MYOM1, AR, EXTL1, ZNF444, OAT, BACE2, WNT4, SETD4, MCTP2, ANKRD45, PAIP2B, TRIM71, ATP8A1, ADCK1, PCSK1, KLHL8, SLC16A12, RET, ALPL, ABLIM2, HEPACAM2, CPT1B, GRIPAP1, MTUS2, SLC46A3, GPRC5C, TBC1D19, ASXL3, MEGF9, PNPLA7, TSPYL2, ZC3H7A, DISC1, IGFBP5, KLK14, ANKRD16, PHPT1, PHKA1, H…
					LRRC10B	WDFY4, ITPR1, NRXN3, HTR2C, TTC8, CPS1, MDM4, RORC, FGG, CAMKK1, KLHL32, NHEJ1, RPH3AL, SLC26A9, KIAA0319, DUOXA1, MYOM1, AR, EXTL1, ZNF444, OAT, BACE2, WNT4, SETD4, MCTP2, ANKRD45, PAIP2B, TRIM71, ATP8A1, ADCK1, PCSK1, KLHL8, SLC16A12, RET, ALPL, ABLIM2, HEPACAM2, CPT1B, GRIPAP1, MTUS2, SLC46A3, GPRC5C, TBC1D19, ASXL3, MEGF9, PNPLA7, TSPYL2, ZC3H7A, DISC1, IGFBP5, KLK14, ANKRD16, PHPT1, PHKA1, H…
					LIMCH1	WDFY4, ITPR1, NRXN3, HTR2C, TTC8, CPS1, MDM4, RORC, FGG, CAMKK1, KLHL32, NHEJ1, RPH3AL, SLC26A9, KIAA0319, DUOXA1, MYOM1, AR, EXTL1, ZNF444, OAT, BACE2, WNT4, SETD4, MCTP2, ANKRD45, PAIP2B, TRIM71, ATP8A1, ADCK1, PCSK1, KLHL8, SLC16A12, RET, ALPL, ABLIM2, HEPACAM2, CPT1B, GRIPAP1, MTUS2, SLC46A3, GPRC5C, TBC1D19, ASXL3, MEGF9, PNPLA7, TSPYL2, ZC3H7A, DISC1, IGFBP5, KLK14, ANKRD16, PHPT1, PHKA1, H…
					PRKAA2	WDFY4, ITPR1, NRXN3, HTR2C, TTC8, CPS1, MDM4, RORC, FGG, CAMKK1, KLHL32, NHEJ1, RPH3AL, SLC26A9, KIAA0319, DUOXA1, MYOM1, AR, EXTL1, ZNF444, OAT, BACE2, WNT4, SETD4, MCTP2, ANKRD45, PAIP2B, TRIM71, ATP8A1, ADCK1, PCSK1, KLHL8, SLC16A12, RET, ALPL, ABLIM2, HEPACAM2, CPT1B, GRIPAP1, MTUS2, SLC46A3, GPRC5C, TBC1D19, ASXL3, MEGF9, PNPLA7, TSPYL2, ZC3H7A, DISC1, IGFBP5, KLK14, ANKRD16, PHPT1, PHKA1, H…
					TTLL6	WDFY4, ITPR1, NRXN3, HTR2C, TTC8, CPS1, MDM4, RORC, FGG, CAMKK1, KLHL32, NHEJ1, RPH3AL, SLC26A9, KIAA0319, DUOXA1, MYOM1, AR, EXTL1, ZNF444, OAT, BACE2, WNT4, SETD4, MCTP2, ANKRD45, PAIP2B, TRIM71, ATP8A1, ADCK1, PCSK1, KLHL8, SLC16A12, RET, ALPL, ABLIM2, HEPACAM2, CPT1B, GRIPAP1, MTUS2, SLC46A3, GPRC5C, TBC1D19, ASXL3, MEGF9, PNPLA7, TSPYL2, ZC3H7A, DISC1, IGFBP5, KLK14, ANKRD16, PHPT1, PHKA1, H…
					ACE2	WDFY4, ITPR1, NRXN3, HTR2C, TTC8, CPS1, MDM4, RORC, FGG, CAMKK1, KLHL32, NHEJ1, RPH3AL, SLC26A9, KIAA0319, DUOXA1, MYOM1, AR, EXTL1, ZNF444, OAT, BACE2, WNT4, SETD4, MCTP2, ANKRD45, PAIP2B, TRIM71, ATP8A1, ADCK1, PCSK1, KLHL8, SLC16A12, RET, ALPL, ABLIM2, HEPACAM2, CPT1B, GRIPAP1, MTUS2, SLC46A3, GPRC5C, TBC1D19, ASXL3, MEGF9, PNPLA7, TSPYL2, ZC3H7A, DISC1, IGFBP5, KLK14, ANKRD16, PHPT1, PHKA1, H…
					FN3K	WDFY4, ITPR1, NRXN3, HTR2C, TTC8, CPS1, MDM4, RORC, FGG, CAMKK1, KLHL32, NHEJ1, RPH3AL, SLC26A9, KIAA0319, DUOXA1, MYOM1, AR, EXTL1, ZNF444, OAT, BACE2, WNT4, SETD4, MCTP2, ANKRD45, PAIP2B, TRIM71, ATP8A1, ADCK1, PCSK1, KLHL8, SLC16A12, RET, ALPL, ABLIM2, HEPACAM2, CPT1B, GRIPAP1, MTUS2, SLC46A3, GPRC5C, TBC1D19, ASXL3, MEGF9, PNPLA7, TSPYL2, ZC3H7A, DISC1, IGFBP5, KLK14, ANKRD16, PHPT1, PHKA1, H…
					OBSCN	WDFY4, ITPR1, NRXN3, HTR2C, TTC8, CPS1, MDM4, RORC, FGG, CAMKK1, KLHL32, NHEJ1, RPH3AL, SLC26A9, KIAA0319, DUOXA1, MYOM1, AR, EXTL1, ZNF444, OAT, BACE2, WNT4, SETD4, MCTP2, ANKRD45, PAIP2B, TRIM71, ATP8A1, ADCK1, PCSK1, KLHL8, SLC16A12, RET, ALPL, ABLIM2, HEPACAM2, CPT1B, GRIPAP1, MTUS2, SLC46A3, GPRC5C, TBC1D19, ASXL3, MEGF9, PNPLA7, TSPYL2, ZC3H7A, DISC1, IGFBP5, KLK14, ANKRD16, PHPT1, PHKA1, H…
					LRP1B	WDFY4, ITPR1, NRXN3, HTR2C, TTC8, CPS1, MDM4, RORC, FGG, CAMKK1, KLHL32, NHEJ1, RPH3AL, SLC26A9, KIAA0319, DUOXA1, MYOM1, AR, EXTL1, ZNF444, OAT, BACE2, WNT4, SETD4, MCTP2, ANKRD45, PAIP2B, TRIM71, ATP8A1, ADCK1, PCSK1, KLHL8, SLC16A12, RET, ALPL, ABLIM2, HEPACAM2, CPT1B, GRIPAP1, MTUS2, SLC46A3, GPRC5C, TBC1D19, ASXL3, MEGF9, PNPLA7, TSPYL2, ZC3H7A, DISC1, IGFBP5, KLK14, ANKRD16, PHPT1, PHKA1, H…
					ANK2	WDFY4, ITPR1, NRXN3, HTR2C, TTC8, CPS1, MDM4, RORC, FGG, CAMKK1, KLHL32, NHEJ1, RPH3AL, SLC26A9, KIAA0319, DUOXA1, MYOM1, AR, EXTL1, ZNF444, OAT, BACE2, WNT4, SETD4, MCTP2, ANKRD45, PAIP2B, TRIM71, ATP8A1, ADCK1, PCSK1, KLHL8, SLC16A12, RET, ALPL, ABLIM2, HEPACAM2, CPT1B, GRIPAP1, MTUS2, SLC46A3, GPRC5C, TBC1D19, ASXL3, MEGF9, PNPLA7, TSPYL2, ZC3H7A, DISC1, IGFBP5, KLK14, ANKRD16, PHPT1, PHKA1, H…
					STK33	WDFY4, ITPR1, NRXN3, HTR2C, TTC8, CPS1, MDM4, RORC, FGG, CAMKK1, KLHL32, NHEJ1, RPH3AL, SLC26A9, KIAA0319, DUOXA1, MYOM1, AR, EXTL1, ZNF444, OAT, BACE2, WNT4, SETD4, MCTP2, ANKRD45, PAIP2B, TRIM71, ATP8A1, ADCK1, PCSK1, KLHL8, SLC16A12, RET, ALPL, ABLIM2, HEPACAM2, CPT1B, GRIPAP1, MTUS2, SLC46A3, GPRC5C, TBC1D19, ASXL3, MEGF9, PNPLA7, TSPYL2, ZC3H7A, DISC1, IGFBP5, KLK14, ANKRD16, PHPT1, PHKA1, H…
					CYP4B1	WDFY4, ITPR1, NRXN3, HTR2C, TTC8, CPS1, MDM4, RORC, FGG, CAMKK1, KLHL32, NHEJ1, RPH3AL, SLC26A9, KIAA0319, DUOXA1, MYOM1, AR, EXTL1, ZNF444, OAT, BACE2, WNT4, SETD4, MCTP2, ANKRD45, PAIP2B, TRIM71, ATP8A1, ADCK1, PCSK1, KLHL8, SLC16A12, RET, ALPL, ABLIM2, HEPACAM2, CPT1B, GRIPAP1, MTUS2, SLC46A3, GPRC5C, TBC1D19, ASXL3, MEGF9, PNPLA7, TSPYL2, ZC3H7A, DISC1, IGFBP5, KLK14, ANKRD16, PHPT1, PHKA1, H…
					TMTC1	WDFY4, ITPR1, NRXN3, HTR2C, TTC8, CPS1, MDM4, RORC, FGG, CAMKK1, KLHL32, NHEJ1, RPH3AL, SLC26A9, KIAA0319, DUOXA1, MYOM1, AR, EXTL1, ZNF444, OAT, BACE2, WNT4, SETD4, MCTP2, ANKRD45, PAIP2B, TRIM71, ATP8A1, ADCK1, PCSK1, KLHL8, SLC16A12, RET, ALPL, ABLIM2, HEPACAM2, CPT1B, GRIPAP1, MTUS2, SLC46A3, GPRC5C, TBC1D19, ASXL3, MEGF9, PNPLA7, TSPYL2, ZC3H7A, DISC1, IGFBP5, KLK14, ANKRD16, PHPT1, PHKA1, H…
					VNN3	WDFY4, ITPR1, NRXN3, HTR2C, TTC8, CPS1, MDM4, RORC, FGG, CAMKK1, KLHL32, NHEJ1, RPH3AL, SLC26A9, KIAA0319, DUOXA1, MYOM1, AR, EXTL1, ZNF444, OAT, BACE2, WNT4, SETD4, MCTP2, ANKRD45, PAIP2B, TRIM71, ATP8A1, ADCK1, PCSK1, KLHL8, SLC16A12, RET, ALPL, ABLIM2, HEPACAM2, CPT1B, GRIPAP1, MTUS2, SLC46A3, GPRC5C, TBC1D19, ASXL3, MEGF9, PNPLA7, TSPYL2, ZC3H7A, DISC1, IGFBP5, KLK14, ANKRD16, PHPT1, PHKA1, H…
					GREB1	WDFY4, ITPR1, NRXN3, HTR2C, TTC8, CPS1, MDM4, RORC, FGG, CAMKK1, KLHL32, NHEJ1, RPH3AL, SLC26A9, KIAA0319, DUOXA1, MYOM1, AR, EXTL1, ZNF444, OAT, BACE2, WNT4, SETD4, MCTP2, ANKRD45, PAIP2B, TRIM71, ATP8A1, ADCK1, PCSK1, KLHL8, SLC16A12, RET, ALPL, ABLIM2, HEPACAM2, CPT1B, GRIPAP1, MTUS2, SLC46A3, GPRC5C, TBC1D19, ASXL3, MEGF9, PNPLA7, TSPYL2, ZC3H7A, DISC1, IGFBP5, KLK14, ANKRD16, PHPT1, PHKA1, H…
					KYNU	WDFY4, ITPR1, NRXN3, HTR2C, TTC8, CPS1, MDM4, RORC, FGG, CAMKK1, KLHL32, NHEJ1, RPH3AL, SLC26A9, KIAA0319, DUOXA1, MYOM1, AR, EXTL1, ZNF444, OAT, BACE2, WNT4, SETD4, MCTP2, ANKRD45, PAIP2B, TRIM71, ATP8A1, ADCK1, PCSK1, KLHL8, SLC16A12, RET, ALPL, ABLIM2, HEPACAM2, CPT1B, GRIPAP1, MTUS2, SLC46A3, GPRC5C, TBC1D19, ASXL3, MEGF9, PNPLA7, TSPYL2, ZC3H7A, DISC1, IGFBP5, KLK14, ANKRD16, PHPT1, PHKA1, H…
					CA8	WDFY4, ITPR1, NRXN3, HTR2C, TTC8, CPS1, MDM4, RORC, FGG, CAMKK1, KLHL32, NHEJ1, RPH3AL, SLC26A9, KIAA0319, DUOXA1, MYOM1, AR, EXTL1, ZNF444, OAT, BACE2, WNT4, SETD4, MCTP2, ANKRD45, PAIP2B, TRIM71, ATP8A1, ADCK1, PCSK1, KLHL8, SLC16A12, RET, ALPL, ABLIM2, HEPACAM2, CPT1B, GRIPAP1, MTUS2, SLC46A3, GPRC5C, TBC1D19, ASXL3, MEGF9, PNPLA7, TSPYL2, ZC3H7A, DISC1, IGFBP5, KLK14, ANKRD16, PHPT1, PHKA1, H…
					F7	WDFY4, ITPR1, NRXN3, HTR2C, TTC8, CPS1, MDM4, RORC, FGG, CAMKK1, KLHL32, NHEJ1, RPH3AL, SLC26A9, KIAA0319, DUOXA1, MYOM1, AR, EXTL1, ZNF444, OAT, BACE2, WNT4, SETD4, MCTP2, ANKRD45, PAIP2B, TRIM71, ATP8A1, ADCK1, PCSK1, KLHL8, SLC16A12, RET, ALPL, ABLIM2, HEPACAM2, CPT1B, GRIPAP1, MTUS2, SLC46A3, GPRC5C, TBC1D19, ASXL3, MEGF9, PNPLA7, TSPYL2, ZC3H7A, DISC1, IGFBP5, KLK14, ANKRD16, PHPT1, PHKA1, H…
					SERPINA3	WDFY4, ITPR1, NRXN3, HTR2C, TTC8, CPS1, MDM4, RORC, FGG, CAMKK1, KLHL32, NHEJ1, RPH3AL, SLC26A9, KIAA0319, DUOXA1, MYOM1, AR, EXTL1, ZNF444, OAT, BACE2, WNT4, SETD4, MCTP2, ANKRD45, PAIP2B, TRIM71, ATP8A1, ADCK1, PCSK1, KLHL8, SLC16A12, RET, ALPL, ABLIM2, HEPACAM2, CPT1B, GRIPAP1, MTUS2, SLC46A3, GPRC5C, TBC1D19, ASXL3, MEGF9, PNPLA7, TSPYL2, ZC3H7A, DISC1, IGFBP5, KLK14, ANKRD16, PHPT1, PHKA1, H…
					SORD	WDFY4, ITPR1, NRXN3, HTR2C, TTC8, CPS1, MDM4, RORC, FGG, CAMKK1, KLHL32, NHEJ1, RPH3AL, SLC26A9, KIAA0319, DUOXA1, MYOM1, AR, EXTL1, ZNF444, OAT, BACE2, WNT4, SETD4, MCTP2, ANKRD45, PAIP2B, TRIM71, ATP8A1, ADCK1, PCSK1, KLHL8, SLC16A12, RET, ALPL, ABLIM2, HEPACAM2, CPT1B, GRIPAP1, MTUS2, SLC46A3, GPRC5C, TBC1D19, ASXL3, MEGF9, PNPLA7, TSPYL2, ZC3H7A, DISC1, IGFBP5, KLK14, ANKRD16, PHPT1, PHKA1, H…
					SLC7A8	WDFY4, ITPR1, NRXN3, HTR2C, TTC8, CPS1, MDM4, RORC, FGG, CAMKK1, KLHL32, NHEJ1, RPH3AL, SLC26A9, KIAA0319, DUOXA1, MYOM1, AR, EXTL1, ZNF444, OAT, BACE2, WNT4, SETD4, MCTP2, ANKRD45, PAIP2B, TRIM71, ATP8A1, ADCK1, PCSK1, KLHL8, SLC16A12, RET, ALPL, ABLIM2, HEPACAM2, CPT1B, GRIPAP1, MTUS2, SLC46A3, GPRC5C, TBC1D19, ASXL3, MEGF9, PNPLA7, TSPYL2, ZC3H7A, DISC1, IGFBP5, KLK14, ANKRD16, PHPT1, PHKA1, H…
					SLC26A4	WDFY4, ITPR1, NRXN3, HTR2C, TTC8, CPS1, MDM4, RORC, FGG, CAMKK1, KLHL32, NHEJ1, RPH3AL, SLC26A9, KIAA0319, DUOXA1, MYOM1, AR, EXTL1, ZNF444, OAT, BACE2, WNT4, SETD4, MCTP2, ANKRD45, PAIP2B, TRIM71, ATP8A1, ADCK1, PCSK1, KLHL8, SLC16A12, RET, ALPL, ABLIM2, HEPACAM2, CPT1B, GRIPAP1, MTUS2, SLC46A3, GPRC5C, TBC1D19, ASXL3, MEGF9, PNPLA7, TSPYL2, ZC3H7A, DISC1, IGFBP5, KLK14, ANKRD16, PHPT1, PHKA1, H…
					LPL	WDFY4, ITPR1, NRXN3, HTR2C, TTC8, CPS1, MDM4, RORC, FGG, CAMKK1, KLHL32, NHEJ1, RPH3AL, SLC26A9, KIAA0319, DUOXA1, MYOM1, AR, EXTL1, ZNF444, OAT, BACE2, WNT4, SETD4, MCTP2, ANKRD45, PAIP2B, TRIM71, ATP8A1, ADCK1, PCSK1, KLHL8, SLC16A12, RET, ALPL, ABLIM2, HEPACAM2, CPT1B, GRIPAP1, MTUS2, SLC46A3, GPRC5C, TBC1D19, ASXL3, MEGF9, PNPLA7, TSPYL2, ZC3H7A, DISC1, IGFBP5, KLK14, ANKRD16, PHPT1, PHKA1, H…
					CES1	WDFY4, ITPR1, NRXN3, HTR2C, TTC8, CPS1, MDM4, RORC, FGG, CAMKK1, KLHL32, NHEJ1, RPH3AL, SLC26A9, KIAA0319, DUOXA1, MYOM1, AR, EXTL1, ZNF444, OAT, BACE2, WNT4, SETD4, MCTP2, ANKRD45, PAIP2B, TRIM71, ATP8A1, ADCK1, PCSK1, KLHL8, SLC16A12, RET, ALPL, ABLIM2, HEPACAM2, CPT1B, GRIPAP1, MTUS2, SLC46A3, GPRC5C, TBC1D19, ASXL3, MEGF9, PNPLA7, TSPYL2, ZC3H7A, DISC1, IGFBP5, KLK14, ANKRD16, PHPT1, PHKA1, H…
